# Supplementary material for: Genetic Risk, Health-Associated Lifestyle, and Risk of Early-onset Total Cancer and Breast Cancer
Source: PubMed Central journal article supplement — medRxiv. 2024 Apr 6:2024.04.04.24305361. Preprint. [Version 1] doi: 10.1101/2024.04.04.24305361 (PMC11023660; doi:10.1101/2024.04.04.24305361), 2024-04-06
Supplement: media-1.pdf [file media-1.pdf]

## Supplement 2

### (Other Supplementary Tables: List of SNPs included in the cancer site-specific PRSs)

#### Genetic Risk, Health-Associated Lifestyle, and Risk of Early-onset Total Cancer and Breast Cancer

Yin Zhang, Sara Lindström, Peter Kraft, Yuxi Liu

**eTable S1**

List of SNPs included in breast cancer PRS

**eTable S2**

List of SNPs included in melanoma PRS

**eTable S3**

List of SNPs included in colorectal cancer PRS

**eTable S4**

List of SNPs included in non-Hodgkin lymphoma PRS

**eTable S5**

List of SNPs included in ovarian cancer PRS

**eTable S6**

List of SNPs included in prostate cancer PRS

**eTable S7**

List of SNPs included in brain cancer PRS

**eTable S8**

List of SNPs included in head and neck cancer PRS

**eTable S9**

List of SNPs included in lung cancer PRS

**eTable S10**

List of SNPs included in endometrial cancer PRS

**eTable S11**

List of SNPs included in testicular cancer PRS

**eTable S12**

List of SNPs included in thyroid cancer PRS

**eTable S13**

List of SNPs included in kidney cancer PRS

**eTable S14**

List of SNPs included in multiple myeloma PRS

**eTable S15**

List of SNPs included in cervical cancer PRS

**eTable S16**

List of SNPs included in pancreatic cancer PRS

**eTable S17**

List of SNPs included in stomach cancer PRS

**eTable S18**

List of SNPs included in lymphoid leukemia PRS

**eTable S19**

List of SNPs included in bladder cancer PRS

**eTable S20**

List of SNPs included in Hodgkin's lymphoma PRS

**eTable S21**

List of SNPs included in larynx cancer PRS

**eTable S22**

List of SNPs included in tracheal cancer PRS

**eTable S23**

List of SNPs included in esophageal cancer PRS

**eTable S1. List of SNPs included in breast cancer PRS**

| Accession              | Chr name | Chr position | Effect allele | Other allele | Effect weight | Include |
|------------------------|----------|--------------|---------------|--------------|---------------|---------|
| PGS000004_hmPOS_GRCh37 | 1        | 100880328    | T             | A            | 0.0373        | NO      |
| PGS000004_hmPOS_GRCh37 | 1        | 10566215     | G             | A            | -0.0586       | YES     |
| PGS000004_hmPOS_GRCh37 | 1        | 110198129    | C             | CAAA         | 0.0458        | YES     |
| PGS000004_hmPOS_GRCh37 | 1        | 114445880    | A             | G            | 0.0621        | YES     |
| PGS000004_hmPOS_GRCh37 | 1        | 118141492    | C             | A            | 0.0452        | YES     |
| PGS000004_hmPOS_GRCh37 | 1        | 120257110    | C             | T            | 0.0385        | YES     |
| PGS000004_hmPOS_GRCh37 | 1        | 121280613    | G             | A            | 0.0881        | YES     |
| PGS000004_hmPOS_GRCh37 | 1        | 121287994    | G             | A            | -0.0673       | YES     |
| PGS000004_hmPOS_GRCh37 | 1        | 145604302    | CT            | C            | -0.0399       | YES     |
| PGS000004_hmPOS_GRCh37 | 1        | 149906413    | C             | T            | 0.0548        | YES     |
| PGS000004_hmPOS_GRCh37 | 1        | 155556971    | A             | G            | 0.0499        | YES     |
| PGS000004_hmPOS_GRCh37 | 1        | 168171052    | C             | CA           | -0.068        | YES     |
| PGS000004_hmPOS_GRCh37 | 1        | 172328767    | TA            | T            | -0.0435       | YES     |
| PGS000004_hmPOS_GRCh37 | 1        | 18807339     | C             | T            | -0.0564       | YES     |
| PGS000004_hmPOS_GRCh37 | 1        | 201437832    | T             | C            | 0.0917        | YES     |
| PGS000004_hmPOS_GRCh37 | 1        | 202184600    | T             | C            | -0.0065       | YES     |
| PGS000004_hmPOS_GRCh37 | 1        | 203770448    | A             | T            | 0.0498        | NO      |
| PGS000004_hmPOS_GRCh37 | 1        | 204502514    | TTCTGAAACAGGG | T            | -0.0321       | YES     |
| PGS000004_hmPOS_GRCh37 | 1        | 208076291    | A             | G            | -0.0366       | YES     |
| PGS000004_hmPOS_GRCh37 | 1        | 217053815    | G             | T            | 0.0417        | YES     |
| PGS000004_hmPOS_GRCh37 | 1        | 217220574    | A             | G            | -0.044        | YES     |
| PGS000004_hmPOS_GRCh37 | 1        | 220671050    | T             | C            | 0.0418        | YES     |
| PGS000004_hmPOS_GRCh37 | 1        | 242034263    | G             | A            | 0.1428        | YES     |
| PGS000004_hmPOS_GRCh37 | 1        | 41380440     | T             | C            | 0.0426        | YES     |
| PGS000004_hmPOS_GRCh37 | 1        | 41389220     | C             | T            | 0.155         | YES     |
| PGS000004_hmPOS_GRCh37 | 1        | 46670206     | T             | TC           | 0.0447        | YES     |
| PGS000004_hmPOS_GRCh37 | 1        | 51467096     | C             | CT           | 0.0374        | YES     |
| PGS000004_hmPOS_GRCh37 | 1        | 7917076      | A             | G            | -0.0409       | YES     |
| PGS000004_hmPOS_GRCh37 | 1        | 88156923     | A             | G            | 0.0494        | YES     |
| PGS000004_hmPOS_GRCh37 | 1        | 88428199     | A             | C            | -0.0387       | YES     |
| PGS000004_hmPOS_GRCh37 | 2        | 10138983     | C             | T            | 0.0603        | YES     |
| PGS000004_hmPOS_GRCh37 | 2        | 121058254    | G             | A            | -0.0334       | YES     |
| PGS000004_hmPOS_GRCh37 | 2        | 121089731    | C             | T            | -0.0427       | YES     |
| PGS000004_hmPOS_GRCh37 | 2        | 121159205    | A             | G            | -0.044        | YES     |
| PGS000004_hmPOS_GRCh37 | 2        | 121246568    | C             | T            | 0.0992        | YES     |
| PGS000004_hmPOS_GRCh37 | 2        | 172974566    | G             | C            | -0.0473       | NO      |
| PGS000004_hmPOS_GRCh37 | 2        | 172974566    | G             | C            | -0.0473       | NO      |
| PGS000004_hmPOS_GRCh37 | 2        | 174212910    | G             | A            | 0.0593        | YES     |
| PGS000004_hmPOS_GRCh37 | 2        | 192381934    | T             | C            | 0.0316        | YES     |
| PGS000004_hmPOS_GRCh37 | 2        | 19315675     | A             | T            | -0.0331       | NO      |
| PGS000004_hmPOS_GRCh37 | 2        | 202204741    | C             | T            | -0.0492       | YES     |
| PGS000004_hmPOS_GRCh37 | 2        | 217920769    | T             | G            | -0.1318       | YES     |
| PGS000004_hmPOS_GRCh37 | 2        | 217955896    | G             | GA           | -0.2016       | YES     |
| PGS000004_hmPOS_GRCh37 | 2        | 218292158    | G             | C            | -0.0757       | NO      |
| PGS000004_hmPOS_GRCh37 | 2        | 218714845    | A             | G            | -0.0431       | YES     |
| PGS000004_hmPOS_GRCh37 | 2        | 241388857    | A             | C            | -0.1232       | YES     |

|                        |   |           |     |         |         |     |
|------------------------|---|-----------|-----|---------|---------|-----|
| PGS000004_hmPOS_GRCh37 | 2 | 25129473  | G   | A       | -0.0427 | YES |
| PGS000004_hmPOS_GRCh37 | 2 | 29179452  | C   | G       | -0.0066 | NO  |
| PGS000004_hmPOS_GRCh37 | 2 | 29615233  | C   | T       | -0.0427 | YES |
| PGS000004_hmPOS_GRCh37 | 2 | 39699510  | CT  | C       | -0.0402 | YES |
| PGS000004_hmPOS_GRCh37 | 2 | 70172587  | A   | G       | -0.0412 | YES |
| PGS000004_hmPOS_GRCh37 | 2 | 88358825  | C   | G       | 0.0473  | NO  |
| PGS000004_hmPOS_GRCh37 | 3 | 141112859 | C   | CTT     | 0.0551  | YES |
| PGS000004_hmPOS_GRCh37 | 3 | 172285237 | A   | G       | 0.0422  | YES |
| PGS000004_hmPOS_GRCh37 | 3 | 189774456 | T   | C       | -0.0478 | YES |
| PGS000004_hmPOS_GRCh37 | 3 | 27353716  | A   | C       | 0.0748  | YES |
| PGS000004_hmPOS_GRCh37 | 3 | 27388664  | G   | C       | 0.0502  | NO  |
| PGS000004_hmPOS_GRCh37 | 3 | 29294845  | T   | C       | -0.1281 | YES |
| PGS000004_hmPOS_GRCh37 | 3 | 30684907  | T   | C       | 0.0592  | YES |
| PGS000004_hmPOS_GRCh37 | 3 | 46888198  | C   | T       | -0.0806 | YES |
| PGS000004_hmPOS_GRCh37 | 3 | 4742251   | G   | A       | 0.0616  | YES |
| PGS000004_hmPOS_GRCh37 | 3 | 49709912  | CT  | C       | -0.0367 | YES |
| PGS000004_hmPOS_GRCh37 | 3 | 55970777  | AT  | A       | -0.1195 | YES |
| PGS000004_hmPOS_GRCh37 | 3 | 59373745  | T   | C       | -0.0394 | YES |
| PGS000004_hmPOS_GRCh37 | 3 | 63887449  | TTG | T       | 0.0648  | NO  |
| PGS000004_hmPOS_GRCh37 | 3 | 71620370  | G   | T       | -0.0374 | YES |
| PGS000004_hmPOS_GRCh37 | 3 | 87037543  | G   | A       | -0.0723 | YES |
| PGS000004_hmPOS_GRCh37 | 3 | 99403877  | A   | G       | -0.0376 | YES |
| PGS000004_hmPOS_GRCh37 | 4 | 106069013 | T   | G       | 0.0471  | YES |
| PGS000004_hmPOS_GRCh37 | 4 | 126752992 | AAT | A       | -0.0377 | NO  |
| PGS000004_hmPOS_GRCh37 | 4 | 143467195 | T   | C       | -0.0569 | YES |
| PGS000004_hmPOS_GRCh37 | 4 | 151218296 | C   | CATATTT | 0.0388  | YES |
| PGS000004_hmPOS_GRCh37 | 4 | 175842495 | A   | G       | -0.0898 | YES |
| PGS000004_hmPOS_GRCh37 | 4 | 175847436 | A   | C       | 0.0348  | YES |
| PGS000004_hmPOS_GRCh37 | 4 | 187503758 | T   | A       | 0.0357  | NO  |
| PGS000004_hmPOS_GRCh37 | 4 | 38784633  | T   | G       | 0.0489  | YES |
| PGS000004_hmPOS_GRCh37 | 4 | 84370124  | TA  | TAA     | -0.0464 | NO  |
| PGS000004_hmPOS_GRCh37 | 4 | 89240476  | A   | G       | 0.0352  | YES |
| PGS000004_hmPOS_GRCh37 | 4 | 92594859  | T   | TTCTTTC | -0.0407 | YES |
| PGS000004_hmPOS_GRCh37 | 5 | 104300273 | T   | G       | -0.0487 | YES |
| PGS000004_hmPOS_GRCh37 | 5 | 122478676 | A   | C       | -0.0386 | YES |
| PGS000004_hmPOS_GRCh37 | 5 | 122705244 | T   | C       | 0.0944  | YES |
| PGS000004_hmPOS_GRCh37 | 5 | 1279790   | T   | C       | 0.0617  | YES |
| PGS000004_hmPOS_GRCh37 | 5 | 1296255   | AG  | A       | -0.0549 | YES |
| PGS000004_hmPOS_GRCh37 | 5 | 131640536 | G   | A       | 0.0392  | YES |
| PGS000004_hmPOS_GRCh37 | 5 | 132407058 | T   | C       | -0.0388 | YES |
| PGS000004_hmPOS_GRCh37 | 5 | 1353077   | C   | T       | 0.1552  | YES |
| PGS000004_hmPOS_GRCh37 | 5 | 158244083 | T   | C       | -0.0677 | YES |
| PGS000004_hmPOS_GRCh37 | 5 | 16231194  | C   | G       | -0.0426 | NO  |
| PGS000004_hmPOS_GRCh37 | 5 | 169591460 | C   | T       | 0.0412  | YES |
| PGS000004_hmPOS_GRCh37 | 5 | 173358154 | A   | G       | 0.0365  | YES |
| PGS000004_hmPOS_GRCh37 | 5 | 176134882 | C   | T       | 0.0363  | YES |
| PGS000004_hmPOS_GRCh37 | 5 | 2777029   | A   | G       | 0.0391  | YES |
| PGS000004_hmPOS_GRCh37 | 5 | 32579616  | T   | TCA     | 0.0363  | YES |
| PGS000004_hmPOS_GRCh37 | 5 | 345109    | C   | T       | 0.084   | YES |

|                        |   |           |     |          |         |     |
|------------------------|---|-----------|-----|----------|---------|-----|
| PGS000004_hmPOS_GRCh37 | 5 | 44508264  | GT  | G        | -0.1177 | YES |
| PGS000004_hmPOS_GRCh37 | 5 | 44619502  | G   | A        | -0.1101 | YES |
| PGS000004_hmPOS_GRCh37 | 5 | 44649944  | T   | C        | 0.0492  | YES |
| PGS000004_hmPOS_GRCh37 | 5 | 44706498  | G   | A        | 0.0497  | YES |
| PGS000004_hmPOS_GRCh37 | 5 | 44853593  | C   | G        | -0.0336 | NO  |
| PGS000004_hmPOS_GRCh37 | 5 | 52679539  | CA  | C        | 0.0571  | NO  |
| PGS000004_hmPOS_GRCh37 | 5 | 55662540  | CT  | C        | -0.0458 | YES |
| PGS000004_hmPOS_GRCh37 | 5 | 55965167  | T   | C        | 0.0394  | YES |
| PGS000004_hmPOS_GRCh37 | 5 | 56023083  | G   | T        | 0.1366  | YES |
| PGS000004_hmPOS_GRCh37 | 5 | 56042972  | T   | C        | 0.0865  | YES |
| PGS000004_hmPOS_GRCh37 | 5 | 56045081  | C   | T        | -0.0564 | YES |
| PGS000004_hmPOS_GRCh37 | 5 | 58241712  | T   | C        | -0.0434 | YES |
| PGS000004_hmPOS_GRCh37 | 5 | 71965007  | A   | G        | -0.041  | YES |
| PGS000004_hmPOS_GRCh37 | 5 | 73234583  | C   | T        | -0.0363 | YES |
| PGS000004_hmPOS_GRCh37 | 5 | 77155397  | G   | GT       | -0.0408 | YES |
| PGS000004_hmPOS_GRCh37 | 5 | 79180995  | GA  | G        | 0.0328  | YES |
| PGS000004_hmPOS_GRCh37 | 5 | 81512947  | T   | TA       | -0.0598 | YES |
| PGS000004_hmPOS_GRCh37 | 5 | 90789470  | A   | G        | -0.0564 | YES |
| PGS000004_hmPOS_GRCh37 | 6 | 130341728 | CT  | C        | 0.0472  | YES |
| PGS000004_hmPOS_GRCh37 | 6 | 13713366  | C   | G        | -0.0553 | NO  |
| PGS000004_hmPOS_GRCh37 | 6 | 149595505 | C   | T        | -0.0476 | YES |
| PGS000004_hmPOS_GRCh37 | 6 | 151949806 | C   | A        | 0.0703  | YES |
| PGS000004_hmPOS_GRCh37 | 6 | 151955914 | G   | A        | 0.1449  | YES |
| PGS000004_hmPOS_GRCh37 | 6 | 152022664 | C   | CAAAAAAA | 0.0137  | YES |
| PGS000004_hmPOS_GRCh37 | 6 | 152023191 | A   | G        | 0.0626  | YES |
| PGS000004_hmPOS_GRCh37 | 6 | 152055978 | T   | A        | 0.074   | NO  |
| PGS000004_hmPOS_GRCh37 | 6 | 152432902 | T   | C        | 0.0649  | YES |
| PGS000004_hmPOS_GRCh37 | 6 | 16399557  | T   | C        | -0.0373 | YES |
| PGS000004_hmPOS_GRCh37 | 6 | 169006947 | G   | C        | -0.0308 | NO  |
| PGS000004_hmPOS_GRCh37 | 6 | 170332621 | C   | T        | 0.0373  | YES |
| PGS000004_hmPOS_GRCh37 | 6 | 18783140  | A   | G        | 0.0326  | YES |
| PGS000004_hmPOS_GRCh37 | 6 | 20537845  | C   | CA       | -0.0391 | YES |
| PGS000004_hmPOS_GRCh37 | 6 | 21923810  | C   | T        | -0.0321 | YES |
| PGS000004_hmPOS_GRCh37 | 6 | 27425644  | C   | G        | -0.0737 | NO  |
| PGS000004_hmPOS_GRCh37 | 6 | 43227141  | A   | G        | -0.064  | YES |
| PGS000004_hmPOS_GRCh37 | 6 | 82263549  | A   | AAT      | 0.0477  | YES |
| PGS000004_hmPOS_GRCh37 | 6 | 85912194  | C   | CAA      | 0.0762  | YES |
| PGS000004_hmPOS_GRCh37 | 6 | 87803819  | C   | T        | 0.0383  | YES |
| PGS000004_hmPOS_GRCh37 | 7 | 101552440 | A   | G        | -0.0568 | YES |
| PGS000004_hmPOS_GRCh37 | 7 | 102481842 | C   | T        | 0.0418  | YES |
| PGS000004_hmPOS_GRCh37 | 7 | 130656911 | T   | C        | -0.0476 | YES |
| PGS000004_hmPOS_GRCh37 | 7 | 130674481 | A   | G        | 0.0416  | YES |
| PGS000004_hmPOS_GRCh37 | 7 | 139943702 | C   | CT       | 0.0582  | YES |
| PGS000004_hmPOS_GRCh37 | 7 | 144048902 | T   | G        | -0.0563 | YES |
| PGS000004_hmPOS_GRCh37 | 7 | 21940960  | G   | A        | -0.0467 | YES |
| PGS000004_hmPOS_GRCh37 | 7 | 25569548  | T   | C        | -0.0486 | YES |
| PGS000004_hmPOS_GRCh37 | 7 | 28869017  | A   | G        | -0.0572 | YES |
| PGS000004_hmPOS_GRCh37 | 7 | 55192256  | C   | A        | -0.0349 | YES |
| PGS000004_hmPOS_GRCh37 | 7 | 91459189  | ATT | A        | 0.0452  | NO  |

|                        |    |           |    |       |         |     |
|------------------------|----|-----------|----|-------|---------|-----|
| PGS000004_hmPOS_GRCh37 | 7  | 94113799  | C  | T     | 0.0449  | YES |
| PGS000004_hmPOS_GRCh37 | 7  | 98005235  | A  | G     | -0.0467 | YES |
| PGS000004_hmPOS_GRCh37 | 7  | 99948655  | G  | T     | 0.042   | YES |
| PGS000004_hmPOS_GRCh37 | 8  | 102483100 | C  | T     | 0.0593  | YES |
| PGS000004_hmPOS_GRCh37 | 8  | 106358620 | T  | A     | -0.0745 | NO  |
| PGS000004_hmPOS_GRCh37 | 8  | 117209548 | G  | A     | -0.0417 | YES |
| PGS000004_hmPOS_GRCh37 | 8  | 120862186 | G  | A     | 0.0527  | YES |
| PGS000004_hmPOS_GRCh37 | 8  | 124563705 | C  | T     | 0.0477  | YES |
| PGS000004_hmPOS_GRCh37 | 8  | 124571581 | A  | G     | 0.034   | YES |
| PGS000004_hmPOS_GRCh37 | 8  | 124739913 | G  | T     | 0.0466  | YES |
| PGS000004_hmPOS_GRCh37 | 8  | 128213561 | CA | C     | -0.043  | YES |
| PGS000004_hmPOS_GRCh37 | 8  | 128370949 | G  | C     | 0.0642  | NO  |
| PGS000004_hmPOS_GRCh37 | 8  | 128372172 | G  | A     | 0.0597  | YES |
| PGS000004_hmPOS_GRCh37 | 8  | 129199566 | A  | G     | 0.0615  | YES |
| PGS000004_hmPOS_GRCh37 | 8  | 143669254 | G  | A     | -0.0346 | YES |
| PGS000004_hmPOS_GRCh37 | 8  | 170692    | C  | T     | 0.0477  | YES |
| PGS000004_hmPOS_GRCh37 | 8  | 17787610  | C  | CT    | -0.0377 | YES |
| PGS000004_hmPOS_GRCh37 | 8  | 23447496  | G  | A     | -0.0389 | YES |
| PGS000004_hmPOS_GRCh37 | 8  | 23663653  | A  | C     | 0.0335  | YES |
| PGS000004_hmPOS_GRCh37 | 8  | 29509616  | C  | A     | -0.0601 | YES |
| PGS000004_hmPOS_GRCh37 | 8  | 36858483  | G  | A     | -0.076  | YES |
| PGS000004_hmPOS_GRCh37 | 8  | 76230943  | G  | A     | 0.0755  | YES |
| PGS000004_hmPOS_GRCh37 | 8  | 76333056  | T  | C     | 0.1129  | YES |
| PGS000004_hmPOS_GRCh37 | 8  | 76378165  | T  | G     | -0.0391 | YES |
| PGS000004_hmPOS_GRCh37 | 9  | 110303808 | T  | TAA   | 0.0797  | YES |
| PGS000004_hmPOS_GRCh37 | 9  | 110837073 | G  | A     | 0.1158  | YES |
| PGS000004_hmPOS_GRCh37 | 9  | 110837176 | T  | C     | 0.0653  | YES |
| PGS000004_hmPOS_GRCh37 | 9  | 110849525 | T  | G     | 0.0153  | YES |
| PGS000004_hmPOS_GRCh37 | 9  | 110885479 | T  | C     | 0.0877  | YES |
| PGS000004_hmPOS_GRCh37 | 9  | 119313486 | G  | A     | -0.0462 | YES |
| PGS000004_hmPOS_GRCh37 | 9  | 129424719 | G  | A     | -0.0382 | YES |
| PGS000004_hmPOS_GRCh37 | 9  | 136146597 | T  | C     | 0.04    | YES |
| PGS000004_hmPOS_GRCh37 | 9  | 21964882  | C  | CAAAA | 0.055   | YES |
| PGS000004_hmPOS_GRCh37 | 9  | 22041998  | G  | C     | 0.0289  | NO  |
| PGS000004_hmPOS_GRCh37 | 9  | 36928288  | C  | T     | 0.0249  | YES |
| PGS000004_hmPOS_GRCh37 | 9  | 6880263   | G  | A     | 0.0348  | YES |
| PGS000004_hmPOS_GRCh37 | 9  | 87782211  | C  | T     | 0.0361  | YES |
| PGS000004_hmPOS_GRCh37 | 9  | 98362587  | C  | T     | 0.0576  | YES |
| PGS000004_hmPOS_GRCh37 | 10 | 114777670 | T  | C     | 0.0472  | YES |
| PGS000004_hmPOS_GRCh37 | 10 | 115128491 | C  | T     | -0.0592 | YES |
| PGS000004_hmPOS_GRCh37 | 10 | 123095209 | A  | G     | -0.0538 | YES |
| PGS000004_hmPOS_GRCh37 | 10 | 123340107 | G  | A     | 0.1508  | YES |
| PGS000004_hmPOS_GRCh37 | 10 | 123340431 | G  | GC    | -0.2408 | YES |
| PGS000004_hmPOS_GRCh37 | 10 | 123349324 | T  | A     | -0.2609 | NO  |
| PGS000004_hmPOS_GRCh37 | 10 | 13892298  | A  | G     | 0.0371  | YES |
| PGS000004_hmPOS_GRCh37 | 10 | 22032942  | G  | A     | -0.058  | YES |
| PGS000004_hmPOS_GRCh37 | 10 | 22477776  | A  | ACC   | 0.1687  | YES |
| PGS000004_hmPOS_GRCh37 | 10 | 22861490  | C  | A     | 0.0875  | NO  |
| PGS000004_hmPOS_GRCh37 | 10 | 38523626  | A  | C     | 0.0404  | YES |

|                        |    |           |    |     |         |     |
|------------------------|----|-----------|----|-----|---------|-----|
| PGS000004_hmPOS_GRCh37 | 10 | 5794652   | G  | A   | 0.047   | YES |
| PGS000004_hmPOS_GRCh37 | 10 | 64299890  | G  | A   | -0.1345 | YES |
| PGS000004_hmPOS_GRCh37 | 10 | 64819996  | T  | G   | 0.0472  | YES |
| PGS000004_hmPOS_GRCh37 | 10 | 71335574  | T  | C   | -0.0404 | YES |
| PGS000004_hmPOS_GRCh37 | 10 | 80851257  | T  | G   | -0.0805 | YES |
| PGS000004_hmPOS_GRCh37 | 10 | 80886726  | G  | A   | 0.0762  | YES |
| PGS000004_hmPOS_GRCh37 | 10 | 95292187  | C  | CAA | -0.0512 | YES |
| PGS000004_hmPOS_GRCh37 | 11 | 103614438 | G  | T   | 0.0147  | YES |
| PGS000004_hmPOS_GRCh37 | 11 | 108267402 | CA | C   | -0.0022 | YES |
| PGS000004_hmPOS_GRCh37 | 11 | 111696440 | C  | T   | -0.0396 | YES |
| PGS000004_hmPOS_GRCh37 | 11 | 116727936 | T  | A   | -0.0423 | NO  |
| PGS000004_hmPOS_GRCh37 | 11 | 122966626 | G  | A   | -0.0383 | YES |
| PGS000004_hmPOS_GRCh37 | 11 | 129243417 | G  | T   | -0.0543 | YES |
| PGS000004_hmPOS_GRCh37 | 11 | 129461016 | G  | A   | 0.0453  | YES |
| PGS000004_hmPOS_GRCh37 | 11 | 18664241  | G  | T   | 0.0461  | YES |
| PGS000004_hmPOS_GRCh37 | 11 | 1895708   | A  | C   | -0.0762 | YES |
| PGS000004_hmPOS_GRCh37 | 11 | 42844441  | T  | C   | -0.0336 | YES |
| PGS000004_hmPOS_GRCh37 | 11 | 433617    | C  | T   | -0.0437 | YES |
| PGS000004_hmPOS_GRCh37 | 11 | 44368892  | A  | G   | 0.0374  | YES |
| PGS000004_hmPOS_GRCh37 | 11 | 46318032  | G  | C   | -0.0748 | NO  |
| PGS000004_hmPOS_GRCh37 | 11 | 65553492  | A  | C   | 0.0425  | YES |
| PGS000004_hmPOS_GRCh37 | 11 | 65572431  | A  | G   | -0.0347 | YES |
| PGS000004_hmPOS_GRCh37 | 11 | 69328130  | T  | A   | -0.0423 | NO  |
| PGS000004_hmPOS_GRCh37 | 11 | 69330983  | A  | G   | 0.1022  | YES |
| PGS000004_hmPOS_GRCh37 | 11 | 69331418  | T  | C   | 0.1782  | YES |
| PGS000004_hmPOS_GRCh37 | 11 | 803017    | G  | A   | 0.0457  | YES |
| PGS000004_hmPOS_GRCh37 | 12 | 103097887 | T  | C   | 0.0546  | YES |
| PGS000004_hmPOS_GRCh37 | 12 | 111600134 | T  | G   | -0.0442 | YES |
| PGS000004_hmPOS_GRCh37 | 12 | 115108136 | C  | T   | 0.0465  | YES |
| PGS000004_hmPOS_GRCh37 | 12 | 115796577 | G  | A   | -0.0428 | YES |
| PGS000004_hmPOS_GRCh37 | 12 | 115835836 | C  | T   | -0.0813 | YES |
| PGS000004_hmPOS_GRCh37 | 12 | 120832146 | T  | C   | 0.0516  | YES |
| PGS000004_hmPOS_GRCh37 | 12 | 14413931  | C  | G   | 0.0484  | NO  |
| PGS000004_hmPOS_GRCh37 | 12 | 28149568  | T  | C   | -0.062  | YES |
| PGS000004_hmPOS_GRCh37 | 12 | 28174817  | T  | C   | -0.0856 | YES |
| PGS000004_hmPOS_GRCh37 | 12 | 28347382  | T  | C   | -0.0521 | YES |
| PGS000004_hmPOS_GRCh37 | 12 | 29140260  | A  | G   | 0.0647  | YES |
| PGS000004_hmPOS_GRCh37 | 12 | 293626    | G  | A   | 0.0401  | YES |
| PGS000004_hmPOS_GRCh37 | 12 | 57146069  | G  | T   | -0.0579 | YES |
| PGS000004_hmPOS_GRCh37 | 12 | 70798355  | T  | A   | 0.0469  | NO  |
| PGS000004_hmPOS_GRCh37 | 12 | 83064195  | GA | G   | 0.0671  | YES |
| PGS000004_hmPOS_GRCh37 | 12 | 85004551  | T  | C   | 0.0348  | YES |
| PGS000004_hmPOS_GRCh37 | 12 | 96027759  | G  | A   | -0.0867 | YES |
| PGS000004_hmPOS_GRCh37 | 13 | 32839990  | A  | G   | 0.0424  | YES |
| PGS000004_hmPOS_GRCh37 | 13 | 32972626  | T  | A   | 0.2687  | NO  |
| PGS000004_hmPOS_GRCh37 | 13 | 43501356  | G  | A   | 0.0517  | YES |
| PGS000004_hmPOS_GRCh37 | 13 | 73806982  | C  | T   | 0.0345  | YES |
| PGS000004_hmPOS_GRCh37 | 13 | 73960952  | G  | A   | 0.0399  | YES |
| PGS000004_hmPOS_GRCh37 | 14 | 105213978 | G  | T   | 0.0399  | YES |

|                        |    |           |    |        |         |     |
|------------------------|----|-----------|----|--------|---------|-----|
| PGS000004_hmPOS_GRCh37 | 14 | 37128564  | A  | C      | -0.0733 | YES |
| PGS000004_hmPOS_GRCh37 | 14 | 37228504  | T  | C      | 0.039   | YES |
| PGS000004_hmPOS_GRCh37 | 14 | 68660428  | C  | T      | -0.0474 | YES |
| PGS000004_hmPOS_GRCh37 | 14 | 68979835  | C  | T      | -0.0911 | YES |
| PGS000004_hmPOS_GRCh37 | 14 | 91751788  | T  | TC     | 0.038   | YES |
| PGS000004_hmPOS_GRCh37 | 14 | 91841069  | G  | A      | 0.0513  | YES |
| PGS000004_hmPOS_GRCh37 | 14 | 93070286  | T  | C      | -0.0577 | YES |
| PGS000004_hmPOS_GRCh37 | 15 | 100905819 | C  | A      | -0.0608 | YES |
| PGS000004_hmPOS_GRCh37 | 15 | 46680811  | A  | C      | -0.1973 | YES |
| PGS000004_hmPOS_GRCh37 | 15 | 50694306  | G  | A      | -0.0417 | YES |
| PGS000004_hmPOS_GRCh37 | 15 | 66630569  | A  | G      | -0.0369 | YES |
| PGS000004_hmPOS_GRCh37 | 15 | 67457698  | G  | A      | 0.0782  | YES |
| PGS000004_hmPOS_GRCh37 | 15 | 75750383  | C  | T      | -0.0413 | YES |
| PGS000004_hmPOS_GRCh37 | 15 | 91512267  | T  | G      | -0.0589 | YES |
| PGS000004_hmPOS_GRCh37 | 16 | 10706580  | A  | G      | -0.074  | YES |
| PGS000004_hmPOS_GRCh37 | 16 | 23007047  | T  | G      | 0.1218  | YES |
| PGS000004_hmPOS_GRCh37 | 16 | 4008542   | C  | CAAAAA | -0.0329 | YES |
| PGS000004_hmPOS_GRCh37 | 16 | 4106788   | A  | C      | -0.03   | YES |
| PGS000004_hmPOS_GRCh37 | 16 | 52538825  | A  | C      | 0.1147  | YES |
| PGS000004_hmPOS_GRCh37 | 16 | 52599188  | T  | C      | 0.107   | YES |
| PGS000004_hmPOS_GRCh37 | 16 | 53809123  | T  | C      | -0.0704 | YES |
| PGS000004_hmPOS_GRCh37 | 16 | 53861139  | T  | C      | -0.0338 | YES |
| PGS000004_hmPOS_GRCh37 | 16 | 53861592  | A  | G      | -0.0337 | YES |
| PGS000004_hmPOS_GRCh37 | 16 | 54682064  | A  | G      | 0.0477  | YES |
| PGS000004_hmPOS_GRCh37 | 16 | 6963972   | G  | C      | 0.0354  | NO  |
| PGS000004_hmPOS_GRCh37 | 16 | 80648296  | G  | A      | 0.0839  | YES |
| PGS000004_hmPOS_GRCh37 | 16 | 85145977  | C  | T      | -0.0211 | YES |
| PGS000004_hmPOS_GRCh37 | 16 | 87086492  | C  | T      | -0.0469 | YES |
| PGS000004_hmPOS_GRCh37 | 17 | 29168077  | T  | G      | -0.0568 | YES |
| PGS000004_hmPOS_GRCh37 | 17 | 39251123  | C  | T      | 0.0799  | YES |
| PGS000004_hmPOS_GRCh37 | 17 | 40127060  | C  | T      | 0.0174  | YES |
| PGS000004_hmPOS_GRCh37 | 17 | 40485239  | T  | G      | -0.0571 | YES |
| PGS000004_hmPOS_GRCh37 | 17 | 40744470  | A  | G      | 0.2017  | YES |
| PGS000004_hmPOS_GRCh37 | 17 | 43212339  | CT | C      | 0.0438  | YES |
| PGS000004_hmPOS_GRCh37 | 17 | 44283858  | A  | G      | -0.054  | YES |
| PGS000004_hmPOS_GRCh37 | 17 | 53209774  | C  | A      | -0.0793 | YES |
| PGS000004_hmPOS_GRCh37 | 17 | 77781725  | G  | A      | -0.0401 | YES |
| PGS000004_hmPOS_GRCh37 | 18 | 11696613  | T  | C      | -0.0381 | YES |
| PGS000004_hmPOS_GRCh37 | 18 | 20634253  | T  | C      | -0.0415 | YES |
| PGS000004_hmPOS_GRCh37 | 18 | 24125857  | C  | T      | 0.0346  | YES |
| PGS000004_hmPOS_GRCh37 | 18 | 24337424  | G  | C      | 0.0455  | NO  |
| PGS000004_hmPOS_GRCh37 | 18 | 24518050  | A  | AT     | -0.0599 | YES |
| PGS000004_hmPOS_GRCh37 | 18 | 25407513  | G  | C      | 0.0399  | NO  |
| PGS000004_hmPOS_GRCh37 | 18 | 29981526  | A  | G      | -0.1058 | YES |
| PGS000004_hmPOS_GRCh37 | 18 | 42411803  | C  | G      | -0.0877 | NO  |
| PGS000004_hmPOS_GRCh37 | 18 | 42888797  | C  | T      | -0.0542 | YES |
| PGS000004_hmPOS_GRCh37 | 19 | 13249921  | T  | G      | 0.0956  | YES |
| PGS000004_hmPOS_GRCh37 | 19 | 17393925  | A  | C      | 0.0378  | YES |
| PGS000004_hmPOS_GRCh37 | 19 | 18569492  | T  | C      | -0.0719 | YES |

|                        |    |          |           |       |         |     |
|------------------------|----|----------|-----------|-------|---------|-----|
| PGS000004_hmPOS_GRCh37 | 19 | 19517054 | CGGGCG    | C     | 0.0437  | YES |
| PGS000004_hmPOS_GRCh37 | 19 | 44283031 | C         | T     | 0.0619  | YES |
| PGS000004_hmPOS_GRCh37 | 19 | 46166073 | C         | T     | -0.036  | YES |
| PGS000004_hmPOS_GRCh37 | 19 | 55816678 | T         | C     | -0.0359 | YES |
| PGS000004_hmPOS_GRCh37 | 20 | 11379842 | C         | T     | 0.0844  | YES |
| PGS000004_hmPOS_GRCh37 | 20 | 41613706 | G         | C     | 0.0315  | NO  |
| PGS000004_hmPOS_GRCh37 | 20 | 52296849 | A         | G     | 0.044   | YES |
| PGS000004_hmPOS_GRCh37 | 20 | 5948227  | A         | G     | 0.076   | YES |
| PGS000004_hmPOS_GRCh37 | 21 | 16364756 | G         | T     | 0.0646  | YES |
| PGS000004_hmPOS_GRCh37 | 21 | 16566350 | G         | A     | 0.0595  | YES |
| PGS000004_hmPOS_GRCh37 | 21 | 16574455 | A         | C     | -0.0707 | YES |
| PGS000004_hmPOS_GRCh37 | 21 | 47762932 | A         | G     | 0.0946  | YES |
| PGS000004_hmPOS_GRCh37 | 22 | 19766137 | T         | C     | -0.0367 | YES |
| PGS000004_hmPOS_GRCh37 | 22 | 29121087 | G         | A     | 0.1839  | YES |
| PGS000004_hmPOS_GRCh37 | 22 | 29135543 | A         | G     | 0.0654  | YES |
| PGS000004_hmPOS_GRCh37 | 22 | 29203724 | T         | C     | 0.1405  | YES |
| PGS000004_hmPOS_GRCh37 | 22 | 29551872 | G         | A     | -0.1716 | YES |
| PGS000004_hmPOS_GRCh37 | 22 | 38583315 | AAAAGAAAG | AAAAG | -0.0471 | NO  |
| PGS000004_hmPOS_GRCh37 | 22 | 39343916 | A         | T     | 0.0407  | NO  |
| PGS000004_hmPOS_GRCh37 | 22 | 40904707 | C         | CT    | 0.1148  | YES |
| PGS000004_hmPOS_GRCh37 | 22 | 43433100 | T         | C     | -0.06   | YES |
| PGS000004_hmPOS_GRCh37 | 22 | 45319953 | A         | G     | -0.0134 | YES |
| PGS000004_hmPOS_GRCh37 | 22 | 46283297 | A         | G     | 0.0736  | YES |

Abbreviations: SNP, Single nucleotide polymorphism; PRS, polygenic risk score.

Total number of variants: 313

Matched, n (%): 275 (87.86%)

Exclusions due to ambiguously matched, n (%): 30 (9.58%)

Exclusions due to unmatched, n (%): 8 (2.56%)



**eTable S2. List of SNPs included in melanoma PRS**

| Accession              | Chr name | Chr position | Effect allele | Other allele | Effect weight | Include |
|------------------------|----------|--------------|---------------|--------------|---------------|---------|
| PGS000790_hmPOS_GRCh37 | 1        | 150860471    | T             | C            | 6.48          | YES     |
| PGS000790_hmPOS_GRCh37 | 2        | 38276549     | A             | G            | 6.13          | YES     |
| PGS000790_hmPOS_GRCh37 | 2        | 202162811    | A             | G            | 6.13          | YES     |
| PGS000790_hmPOS_GRCh37 | 5        | 1322087      | A             | G            | 5.54          | YES     |
| PGS000790_hmPOS_GRCh37 | 5        | 33946571     | G             | A            | 9.64          | YES     |
| PGS000790_hmPOS_GRCh37 | 6        | 421281       | A             | G            | 7.45          | YES     |
| PGS000790_hmPOS_GRCh37 | 6        | 21163919     | C             | T            | 5.57          | YES     |
| PGS000790_hmPOS_GRCh37 | 7        | 16984280     | T             | C            | 6.01          | YES     |
| PGS000790_hmPOS_GRCh37 | 9        | 21803880     | C             | A            | 8.47          | YES     |
| PGS000790_hmPOS_GRCh37 | 9        | 109060830    | T             | C            | 6.52          | YES     |
| PGS000790_hmPOS_GRCh37 | 10       | 105668843    | G             | A            | 5.98          | YES     |
| PGS000790_hmPOS_GRCh37 | 11       | 69367118     | A             | C            | 7.16          | YES     |
| PGS000790_hmPOS_GRCh37 | 11       | 89011046     | A             | G            | 7.63          | YES     |
| PGS000790_hmPOS_GRCh37 | 11       | 108175462    | G             | A            | 5.91          | YES     |
| PGS000790_hmPOS_GRCh37 | 15       | 28335820     | A             | G            | 6.69          | YES     |
| PGS000790_hmPOS_GRCh37 | 16       | 54114824     | A             | G            | 6.95          | YES     |
| PGS000790_hmPOS_GRCh37 | 16       | 89726484     | A             | G            | 7.11          | YES     |
| PGS000790_hmPOS_GRCh37 | 16       | 89986117     | T             | C            | 12.73         | YES     |
| PGS000790_hmPOS_GRCh37 | 16       | 90029417     | G             | A            | 6.45          | YES     |
| PGS000790_hmPOS_GRCh37 | 16       | 90066936     | A             | C            | 9.88          | YES     |
| PGS000790_hmPOS_GRCh37 | 20       | 31806588     | C             | T            | 6.29          | YES     |
| PGS000790_hmPOS_GRCh37 | 20       | 32665748     | A             | G            | 9.88          | YES     |
| PGS000790_hmPOS_GRCh37 | 21       | 42746081     | A             | G            | 5.94          | YES     |
| PGS000790_hmPOS_GRCh37 | 22       | 38563471     | C             | T            | 6.03          | YES     |

Abbreviations: SNP, Single nucleotide polymorphism; PRS, polygenic risk score.

Total number of variants: 24

Matched, n (%): 24 (100%)

Exclusions due to ambiguously matched, n (%): 0 (0%)

Exclusions due to unmatched, n (%): 0 (0%)

**eTable S3. List of SNPs included in colorectal cancer PRS**

| Accession              | Chr name | Chr position | Effect allele | Other allele | Effect weight | Include |
|------------------------|----------|--------------|---------------|--------------|---------------|---------|
| PGS002252_hmPOS_GRCh37 | 1        | 22587728     | T             | C            | 0.0504        | YES     |
| PGS002252_hmPOS_GRCh37 | 1        | 38455891     | G             | C            | 0.0523        | NO      |
| PGS002252_hmPOS_GRCh37 | 1        | 55246035     | C             | T            | 0.0665        | YES     |
| PGS002252_hmPOS_GRCh37 | 1        | 62673037     | C             | T            | 0.077         | YES     |
| PGS002252_hmPOS_GRCh37 | 1        | 183002639    | A             | G            | 0.073         | YES     |
| PGS002252_hmPOS_GRCh37 | 1        | 222112634    | G             | A            | 0.0877        | YES     |
| PGS002252_hmPOS_GRCh37 | 2        | 48686695     | T             | A            | 0.0953        | NO      |
| PGS002252_hmPOS_GRCh37 | 2        | 98275354     | G             | A            | 0.1133        | YES     |
| PGS002252_hmPOS_GRCh37 | 2        | 159964552    | C             | T            | 0.0511        | YES     |
| PGS002252_hmPOS_GRCh37 | 2        | 199612407    | C             | T            | 0.0535        | YES     |
| PGS002252_hmPOS_GRCh37 | 2        | 199781586    | T             | C            | 0.0627        | YES     |
| PGS002252_hmPOS_GRCh37 | 2        | 219191256    | T             | C            | 0.0613        | YES     |
| PGS002252_hmPOS_GRCh37 | 3        | 40915239     | G             | A            | 0.0994        | YES     |
| PGS002252_hmPOS_GRCh37 | 3        | 53088285     | G             | T            | 0.0677        | YES     |
| PGS002252_hmPOS_GRCh37 | 3        | 66365163     | A             | G            | 0.0597        | YES     |
| PGS002252_hmPOS_GRCh37 | 3        | 112903888    | A             | G            | 0.0474        | YES     |
| PGS002252_hmPOS_GRCh37 | 3        | 112916918    | C             | T            | 0.077         | YES     |
| PGS002252_hmPOS_GRCh37 | 3        | 112999560    | G             | A            | 0.1761        | YES     |
| PGS002252_hmPOS_GRCh37 | 3        | 133701119    | A             | G            | 0.0597        | YES     |
| PGS002252_hmPOS_GRCh37 | 3        | 133748789    | T             | C            | 0.0953        | YES     |
| PGS002252_hmPOS_GRCh37 | 3        | 169517436    | C             | T            | 0.0453        | YES     |
| PGS002252_hmPOS_GRCh37 | 4        | 94938618     | A             | C            | 0.052         | YES     |
| PGS002252_hmPOS_GRCh37 | 4        | 106128760    | A             | G            | 0.0522        | YES     |
| PGS002252_hmPOS_GRCh37 | 4        | 145659064    | C             | T            | 0.0842        | YES     |
| PGS002252_hmPOS_GRCh37 | 5        | 1240204      | T             | C            | 0.1119        | YES     |
| PGS002252_hmPOS_GRCh37 | 5        | 1296486      | G             | A            | 0.0865        | YES     |
| PGS002252_hmPOS_GRCh37 | 5        | 40102443     | A             | G            | 0.0545        | YES     |
| PGS002252_hmPOS_GRCh37 | 5        | 40280076     | A             | G            | 0.1013        | YES     |
| PGS002252_hmPOS_GRCh37 | 5        | 98206082     | T             | A            | 0.5559        | NO      |
| PGS002252_hmPOS_GRCh37 | 5        | 112097351    | G             | A            | 0.6286        | YES     |
| PGS002252_hmPOS_GRCh37 | 5        | 125988175    | G             | A            | 0.0862        | YES     |
| PGS002252_hmPOS_GRCh37 | 5        | 134467220    | C             | T            | 0.0693        | YES     |
| PGS002252_hmPOS_GRCh37 | 6        | 12292772     | T             | G            | 0.0677        | YES     |
| PGS002252_hmPOS_GRCh37 | 6        | 29809860     | A             | G            | 0.1133        | YES     |
| PGS002252_hmPOS_GRCh37 | 6        | 30758466     | G             | A            | 0.0677        | YES     |
| PGS002252_hmPOS_GRCh37 | 6        | 31010185     | C             | T            | 0.1545        | YES     |
| PGS002252_hmPOS_GRCh37 | 6        | 31315512     | G             | A            | 0.0698        | YES     |
| PGS002252_hmPOS_GRCh37 | 6        | 31449620     | C             | T            | 0.1118        | YES     |
| PGS002252_hmPOS_GRCh37 | 6        | 32191339     | T             | C            | 0.1484        | YES     |
| PGS002252_hmPOS_GRCh37 | 6        | 32593080     | G             | A            | 0.0889        | YES     |
| PGS002252_hmPOS_GRCh37 | 6        | 35569562     | A             | G            | 0.0778        | YES     |
| PGS002252_hmPOS_GRCh37 | 6        | 36623379     | A             | G            | 0.054         | YES     |
| PGS002252_hmPOS_GRCh37 | 6        | 41702582     | C             | T            | 0.033         | YES     |
| PGS002252_hmPOS_GRCh37 | 6        | 105970139    | C             | A            | 0.0322        | YES     |
| PGS002252_hmPOS_GRCh37 | 6        | 55566108     | G             | A            | 0.068         | YES     |

|                        |    |           |   |   |        |     |
|------------------------|----|-----------|---|---|--------|-----|
| PGS002252_hmPOS_GRCh37 | 6  | 55712124  | C | T | 0.0724 | YES |
| PGS002252_hmPOS_GRCh37 | 7  | 45136423  | T | C | 0.065  | YES |
| PGS002252_hmPOS_GRCh37 | 7  | 46094089  | T | C | 0.0643 | YES |
| PGS002252_hmPOS_GRCh37 | 7  | 46926695  | C | T | 0.0583 | YES |
| PGS002252_hmPOS_GRCh37 | 7  | 47511161  | G | A | 0.077  | YES |
| PGS002252_hmPOS_GRCh37 | 8  | 117630683 | C | A | 0.2099 | YES |
| PGS002252_hmPOS_GRCh37 | 8  | 117632965 | G | C | 0.0677 | NO  |
| PGS002252_hmPOS_GRCh37 | 8  | 117790914 | A | C | 0.1139 | YES |
| PGS002252_hmPOS_GRCh37 | 8  | 128413305 | G | T | 0.1052 | YES |
| PGS002252_hmPOS_GRCh37 | 8  | 128414892 | T | C | 0.0606 | YES |
| PGS002252_hmPOS_GRCh37 | 8  | 128571855 | G | T | 0.0608 | YES |
| PGS002252_hmPOS_GRCh37 | 9  | 22103183  | G | T | 0.0504 | YES |
| PGS002252_hmPOS_GRCh37 | 9  | 101679752 | T | G | 0.0818 | YES |
| PGS002252_hmPOS_GRCh37 | 9  | 113671403 | C | T | 0.0637 | YES |
| PGS002252_hmPOS_GRCh37 | 10 | 8663875   | C | T | 0.0462 | YES |
| PGS002252_hmPOS_GRCh37 | 10 | 8739580   | T | A | 0.1064 | NO  |
| PGS002252_hmPOS_GRCh37 | 10 | 52648454  | C | T | 0.073  | YES |
| PGS002252_hmPOS_GRCh37 | 10 | 80819132  | G | A | 0.0765 | YES |
| PGS002252_hmPOS_GRCh37 | 10 | 81046265  | C | T | 0.0483 | YES |
| PGS002252_hmPOS_GRCh37 | 10 | 101315166 | G | A | 0.0514 | YES |
| PGS002252_hmPOS_GRCh37 | 10 | 101351704 | G | A | 0.0889 | YES |
| PGS002252_hmPOS_GRCh37 | 10 | 114288619 | C | T | 0.0975 | YES |
| PGS002252_hmPOS_GRCh37 | 10 | 114722621 | A | G | 0.0527 | YES |
| PGS002252_hmPOS_GRCh37 | 11 | 10286755  | C | A | 0.0953 | YES |
| PGS002252_hmPOS_GRCh37 | 11 | 61549025  | G | A | 0.0636 | YES |
| PGS002252_hmPOS_GRCh37 | 11 | 74280012  | G | T | 0.078  | YES |
| PGS002252_hmPOS_GRCh37 | 11 | 74409077  | C | T | 0.0603 | YES |
| PGS002252_hmPOS_GRCh37 | 11 | 74427921  | C | T | 0.1934 | YES |
| PGS002252_hmPOS_GRCh37 | 11 | 100717136 | G | A | 0.0774 | YES |
| PGS002252_hmPOS_GRCh37 | 11 | 101656397 | T | A | 0.0537 | NO  |
| PGS002252_hmPOS_GRCh37 | 11 | 111156836 | T | C | 0.1122 | YES |
| PGS002252_hmPOS_GRCh37 | 12 | 4368607   | C | T | 0.089  | YES |
| PGS002252_hmPOS_GRCh37 | 12 | 4388271   | T | C | 0.1181 | YES |
| PGS002252_hmPOS_GRCh37 | 12 | 4400808   | T | C | 0.055  | YES |
| PGS002252_hmPOS_GRCh37 | 12 | 6406904   | C | T | 0.051  | YES |
| PGS002252_hmPOS_GRCh37 | 12 | 6421174   | T | A | 0.0597 | NO  |
| PGS002252_hmPOS_GRCh37 | 12 | 12035649  | C | T | 0.0145 | YES |
| PGS002252_hmPOS_GRCh37 | 12 | 31594813  | T | C | 0.3646 | YES |
| PGS002252_hmPOS_GRCh37 | 12 | 43134191  | G | A | 0.053  | YES |
| PGS002252_hmPOS_GRCh37 | 12 | 51171090  | G | A | 0.0896 | YES |
| PGS002252_hmPOS_GRCh37 | 12 | 57533690  | A | C | 0.053  | YES |
| PGS002252_hmPOS_GRCh37 | 12 | 111973358 | G | A | 0.0737 | YES |
| PGS002252_hmPOS_GRCh37 | 12 | 115100714 | C | T | 0.0456 | YES |
| PGS002252_hmPOS_GRCh37 | 12 | 115890922 | C | T | 0.066  | YES |
| PGS002252_hmPOS_GRCh37 | 12 | 117763309 | A | C | 0.064  | YES |
| PGS002252_hmPOS_GRCh37 | 13 | 34092165  | C | T | 0.0468 | NO  |
| PGS002252_hmPOS_GRCh37 | 13 | 37462010  | G | A | 0.0758 | YES |
| PGS002252_hmPOS_GRCh37 | 13 | 73649152  | A | G | 0.0505 | YES |

|                        |    |           |   |   |        |     |
|------------------------|----|-----------|---|---|--------|-----|
| PGS002252_hmPOS_GRCh37 | 13 | 73791554  | C | T | 0.0982 | YES |
| PGS002252_hmPOS_GRCh37 | 13 | 73997961  | A | G | 0.0544 | YES |
| PGS002252_hmPOS_GRCh37 | 13 | 78609615  | C | T | 0.1044 | YES |
| PGS002252_hmPOS_GRCh37 | 13 | 111075881 | T | C | 0.0549 | YES |
| PGS002252_hmPOS_GRCh37 | 14 | 54369299  | A | G | 0.0407 | YES |
| PGS002252_hmPOS_GRCh37 | 14 | 54419106  | C | A | 0.0912 | YES |
| PGS002252_hmPOS_GRCh37 | 14 | 54445157  | G | A | 0.0465 | YES |
| PGS002252_hmPOS_GRCh37 | 14 | 59189361  | G | A | 0.0691 | YES |
| PGS002252_hmPOS_GRCh37 | 14 | 59208437  | A | G | 0.0454 | YES |
| PGS002252_hmPOS_GRCh37 | 15 | 32992836  | G | A | 0.0464 | YES |
| PGS002252_hmPOS_GRCh37 | 15 | 33010736  | A | G | 0.1248 | YES |
| PGS002252_hmPOS_GRCh37 | 15 | 33156386  | A | G | 0.0705 | YES |
| PGS002252_hmPOS_GRCh37 | 15 | 67007018  | C | G | 0.0476 | NO  |
| PGS002252_hmPOS_GRCh37 | 15 | 67402824  | C | T | 0.0689 | YES |
| PGS002252_hmPOS_GRCh37 | 15 | 68060389  | G | T | 0.049  | YES |
| PGS002252_hmPOS_GRCh37 | 15 | 91172901  | T | C | 0.1044 | YES |
| PGS002252_hmPOS_GRCh37 | 16 | 68743939  | A | C | 0.055  | YES |
| PGS002252_hmPOS_GRCh37 | 16 | 80043258  | C | A | 0.0498 | YES |
| PGS002252_hmPOS_GRCh37 | 16 | 86252544  | A | G | 0.0472 | YES |
| PGS002252_hmPOS_GRCh37 | 16 | 86339315  | T | C | 0.0487 | YES |
| PGS002252_hmPOS_GRCh37 | 16 | 86703949  | T | C | 0.0481 | YES |
| PGS002252_hmPOS_GRCh37 | 17 | 809643    | G | A | 0.0514 | YES |
| PGS002252_hmPOS_GRCh37 | 17 | 814243    | A | T | 0.068  | NO  |
| PGS002252_hmPOS_GRCh37 | 17 | 10707241  | A | G | 0.0748 | YES |
| PGS002252_hmPOS_GRCh37 | 17 | 70413253  | A | G | 0.0595 | YES |
| PGS002252_hmPOS_GRCh37 | 8  | 24766973  | A | G | 0.6995 | NO  |
| PGS002252_hmPOS_GRCh37 | 2  | 101194093 | G | A | 0.0882 | NO  |
| PGS002252_hmPOS_GRCh37 | 14 | 54705203  | A | T | 0.1606 | NO  |
| PGS002252_hmPOS_GRCh37 | 2  | 53218607  | T | G | 0.1939 | NO  |
| PGS002252_hmPOS_GRCh37 | 19 | 41871573  | A | G | 0.0441 | YES |
| PGS002252_hmPOS_GRCh37 | 12 | 8047901   | T | C | 0.0632 | NO  |
| PGS002252_hmPOS_GRCh37 | 20 | 6376457   | G | C | 0.0795 | NO  |
| PGS002252_hmPOS_GRCh37 | 20 | 6603622   | C | T | 0.0627 | YES |
| PGS002252_hmPOS_GRCh37 | 20 | 6699595   | G | T | 0.0819 | YES |
| PGS002252_hmPOS_GRCh37 | 20 | 6762221   | T | C | 0.0714 | YES |
| PGS002252_hmPOS_GRCh37 | 8  | 135019276 | G | A | 0.0874 | NO  |
| PGS002252_hmPOS_GRCh37 | 20 | 33213196  | C | A | 0.045  | YES |
| PGS002252_hmPOS_GRCh37 | 20 | 42666475  | T | C | 0.0597 | YES |
| PGS002252_hmPOS_GRCh37 | 20 | 47340117  | A | G | 0.0719 | YES |
| PGS002252_hmPOS_GRCh37 | 20 | 48983697  | C | T | 0.0446 | YES |
| PGS002252_hmPOS_GRCh37 | 20 | 49055318  | C | T | 0.0547 | YES |
| PGS002252_hmPOS_GRCh37 | 20 | 49256285  | T | C | 0.062  | YES |
| PGS002252_hmPOS_GRCh37 | 20 | 57475191  | G | A | 0.077  | YES |
| PGS002252_hmPOS_GRCh37 | 20 | 60932414  | C | T | 0.1146 | YES |
| PGS002252_hmPOS_GRCh37 | 20 | 62308612  | T | G | 0.0593 | YES |

Abbreviations: SNP, Single nucleotide polymorphism; PRS, polygenic risk score.

Total number of variants: 141

Matched, n (%): 121 (85.82%)

Exclusions due to ambiguously matched, n (%): 10 (7.09%)

Exclusions due to unmatched, n (%): 10 (7.09%)

**eTable S4. List of SNPs included in non-Hodgkin lymphoma PRS**

| Accession              | Chr name | Chr position | Effect allele | Other allele | Effect weight | Include |
|------------------------|----------|--------------|---------------|--------------|---------------|---------|
| PGS000791_hmPOS_GRCh37 | 2        | 24694472     | T             | C            | 5.48          | YES     |
| PGS000791_hmPOS_GRCh37 | 3        | 121800487    | A             | C            | 5.93          | YES     |
| PGS000791_hmPOS_GRCh37 | 3        | 121817613    | A             | G            | 6.16          | YES     |
| PGS000791_hmPOS_GRCh37 | 3        | 188299902    | G             | A            | 6.45          | YES     |
| PGS000791_hmPOS_GRCh37 | 6        | 484453       | G             | C            | 9.49          | NO      |
| PGS000791_hmPOS_GRCh37 | 6        | 29832526     | T             | C            | 5.75          | YES     |
| PGS000791_hmPOS_GRCh37 | 6        | 31074030     | C             | A            | 6.61          | YES     |
| PGS000791_hmPOS_GRCh37 | 6        | 31322790     | A             | T            | 6.33          | NO      |
| PGS000791_hmPOS_GRCh37 | 6        | 32370587     | C             | G            | 7.86          | NO      |
| PGS000791_hmPOS_GRCh37 | 6        | 32444544     | T             | C            | 21.23         | YES     |
| PGS000791_hmPOS_GRCh37 | 6        | 32665420     | G             | T            | 13.24         | YES     |
| PGS000791_hmPOS_GRCh37 | 6        | 32741868     | C             | T            | 9.41          | YES     |
| PGS000791_hmPOS_GRCh37 | 6        | 32796751     | C             | T            | 7.52          | YES     |
| PGS000791_hmPOS_GRCh37 | 8        | 129076573    | T             | C            | 7.13          | YES     |
| PGS000791_hmPOS_GRCh37 | 8        | 129269466    | A             | G            | 6.62          | YES     |
| PGS000791_hmPOS_GRCh37 | 11       | 58060192     | T             | C            | 5.5           | YES     |
| PGS000791_hmPOS_GRCh37 | 11       | 118741842    | C             | T            | 9.15          | YES     |
| PGS000791_hmPOS_GRCh37 | 11       | 128492739    | T             | C            | 6.53          | YES     |
| PGS000791_hmPOS_GRCh37 | 18       | 60783211     | G             | A            | 6.14          | YES     |

Abbreviations: SNP, Single nucleotide polymorphism; PRS, polygenic risk score.

Total number of variants: 19

Matched, n (%): 16 (84.21%)

Exclusions due to ambiguously matched, n (%): 3 (15.79%)

Exclusions due to unmatched, n (%): 0 (0%)

**eTable S5. List of SNPs included in ovarian cancer PRS**

| Accession              | Chr name | Chr position | Effect allele | Other allele | Effect weight | Include |
|------------------------|----------|--------------|---------------|--------------|---------------|---------|
| PGS003394_hmPOS_GRCh37 | 1        | 22468215     | T             | C            | 0.0808        | YES     |
| PGS003394_hmPOS_GRCh37 | 1        | 38082122     | A             | G            | 0.0835        | YES     |
| PGS003394_hmPOS_GRCh37 | 2        | 111818658    | C             | A            | 0.0642        | YES     |
| PGS003394_hmPOS_GRCh37 | 2        | 111915946    | T             | G            | -0.0118       | YES     |
| PGS003394_hmPOS_GRCh37 | 2        | 113973964    | C             | T            | 0.0518        | YES     |
| PGS003394_hmPOS_GRCh37 | 2        | 113979364    | A             | G            | 0.0323        | YES     |
| PGS003394_hmPOS_GRCh37 | 2        | 177037831    | G             | C            | -0.1005       | NO      |
| PGS003394_hmPOS_GRCh37 | 3        | 156402487    | T             | C            | 0.3647        | YES     |
| PGS003394_hmPOS_GRCh37 | 3        | 190531882    | A             | G            | -0.0668       | YES     |
| PGS003394_hmPOS_GRCh37 | 4        | 70577859     | A             | G            | -0.0574       | YES     |
| PGS003394_hmPOS_GRCh37 | 5        | 1279790      | T             | C            | 0.0351        | YES     |
| PGS003394_hmPOS_GRCh37 | 5        | 1285974      | A             | C            | 0.059         | YES     |
| PGS003394_hmPOS_GRCh37 | 5        | 1287194      | A             | G            | -0.0849       | YES     |
| PGS003394_hmPOS_GRCh37 | 5        | 1295349      | G             | A            | -0.0797       | YES     |
| PGS003394_hmPOS_GRCh37 | 5        | 54476556     | A             | G            | -0.0666       | YES     |
| PGS003394_hmPOS_GRCh37 | 8        | 82653644     | G             | A            | 0.1294        | YES     |
| PGS003394_hmPOS_GRCh37 | 8        | 128817883    | G             | A            | 0.076         | YES     |
| PGS003394_hmPOS_GRCh37 | 8        | 129069820    | A             | G            | -0.0692       | YES     |
| PGS003394_hmPOS_GRCh37 | 8        | 129217984    | C             | G            | 0.0485        | NO      |
| PGS003394_hmPOS_GRCh37 | 8        | 129551633    | A             | G            | -0.1759       | YES     |
| PGS003394_hmPOS_GRCh37 | 9        | 16914716     | A             | G            | -0.1392       | YES     |
| PGS003394_hmPOS_GRCh37 | 9        | 16914835     | C             | A            | -0.101        | YES     |
| PGS003394_hmPOS_GRCh37 | 9        | 19044489     | A             | G            | 0.0788        | YES     |
| PGS003394_hmPOS_GRCh37 | 9        | 106912892    | A             | G            | 0.0582        | YES     |
| PGS003394_hmPOS_GRCh37 | 9        | 136155000    | T             | C            | 0.0931        | YES     |
| PGS003394_hmPOS_GRCh37 | 10       | 21821274     | A             | G            | 0.0799        | YES     |
| PGS003394_hmPOS_GRCh37 | 10       | 112011084    | G             | A            | 0.0752        | YES     |
| PGS003394_hmPOS_GRCh37 | 12       | 121415293    | A             | G            | -0.0593       | YES     |
| PGS003394_hmPOS_GRCh37 | 15       | 91535329     | T             | G            | -0.0804       | YES     |
| PGS003394_hmPOS_GRCh37 | 17       | 36100767     | G             | A            | -0.0582       | YES     |
| PGS003394_hmPOS_GRCh37 | 17       | 44790203     | G             | A            | 0.1026        | YES     |
| PGS003394_hmPOS_GRCh37 | 17       | 46472432     | G             | C            | 0.1182        | NO      |
| PGS003394_hmPOS_GRCh37 | 18       | 21425852     | C             | T            | -0.0283       | YES     |
| PGS003394_hmPOS_GRCh37 | 19       | 17390291     | C             | T            | 0.0797        | YES     |
| PGS003394_hmPOS_GRCh37 | 19       | 17409380     | T             | C            | -0.0613       | YES     |
| PGS003394_hmPOS_GRCh37 | 21       | 36080398     | C             | T            | -0.0599       | YES     |

Abbreviations: SNP, Single nucleotide polymorphism; PRS, polygenic risk score.

Total number of variants: 36

Matched, n (%): 33 (91.67%)

Exclusions due to ambiguously matched, n (%): 3 (8.33%)

Exclusions due to unmatched, n (%): 0 (0%)

**eTable S6. List of SNPs included in prostate cancer PRS**

| Accession              | Chr name | Chr position | Effect allele | Other allele | Effect weight | Include |
|------------------------|----------|--------------|---------------|--------------|---------------|---------|
| PGS000662_hmPOS_GRCh37 | 1        | 5743196      | T             | C            | 0.102298257   | YES     |
| PGS000662_hmPOS_GRCh37 | 1        | 10564675     | A             | G            | 0.042411273   | YES     |
| PGS000662_hmPOS_GRCh37 | 1        | 16376831     | C             | T            | 0.055506528   | YES     |
| PGS000662_hmPOS_GRCh37 | 1        | 46251655     | T             | C            | 0.07282201    | YES     |
| PGS000662_hmPOS_GRCh37 | 1        | 88210716     | AT            | A            | 0.048255598   | NO      |
| PGS000662_hmPOS_GRCh37 | 1        | 150772613    | C             | T            | 0.080240037   | YES     |
| PGS000662_hmPOS_GRCh37 | 1        | 150954671    | A             | G            | 0.067047369   | YES     |
| PGS000662_hmPOS_GRCh37 | 1        | 153923276    | T             | C            | 0.066274137   | YES     |
| PGS000662_hmPOS_GRCh37 | 1        | 154980351    | T             | C            | 0.056375028   | YES     |
| PGS000662_hmPOS_GRCh37 | 1        | 155118588    | C             | T            | 0.155225047   | YES     |
| PGS000662_hmPOS_GRCh37 | 1        | 155690186    | A             | C            | 0.159117402   | YES     |
| PGS000662_hmPOS_GRCh37 | 1        | 157119915    | C             | G            | 0.135841227   | NO      |
| PGS000662_hmPOS_GRCh37 | 1        | 163295678    | A             | C            | 0.047902642   | YES     |
| PGS000662_hmPOS_GRCh37 | 1        | 167135941    | T             | A            | 0.069514594   | NO      |
| PGS000662_hmPOS_GRCh37 | 1        | 179897070    | A             | C            | 0.059516664   | YES     |
| PGS000662_hmPOS_GRCh37 | 1        | 183032448    | CTAAG         | C            | 0.041323726   | NO      |
| PGS000662_hmPOS_GRCh37 | 1        | 204030363    | TTTTG         | T            | 0.046586396   | NO      |
| PGS000662_hmPOS_GRCh37 | 1        | 204518842    | A             | C            | 0.098400085   | YES     |
| PGS000662_hmPOS_GRCh37 | 1        | 205739266    | C             | T            | 0.052895608   | YES     |
| PGS000662_hmPOS_GRCh37 | 2        | 8598444      | T             | G            | 0.045271509   | YES     |
| PGS000662_hmPOS_GRCh37 | 2        | 10094526     | G             | A            | 0.079052443   | YES     |
| PGS000662_hmPOS_GRCh37 | 2        | 10781975     | T             | C            | 0.063322715   | YES     |
| PGS000662_hmPOS_GRCh37 | 2        | 16016503     | C             | A            | 0.066285498   | YES     |
| PGS000662_hmPOS_GRCh37 | 2        | 20878105     | G             | A            | 0.087466559   | YES     |
| PGS000662_hmPOS_GRCh37 | 2        | 43064555     | C             | G            | 0.04556022    | NO      |
| PGS000662_hmPOS_GRCh37 | 2        | 43637998     | A             | G            | 0.084466752   | YES     |
| PGS000662_hmPOS_GRCh37 | 2        | 43851282     | C             | G            | 0.055212234   | NO      |
| PGS000662_hmPOS_GRCh37 | 2        | 62752975     | G             | A            | 0.106870463   | YES     |
| PGS000662_hmPOS_GRCh37 | 2        | 63277843     | G             | C            | 0.112596574   | NO      |
| PGS000662_hmPOS_GRCh37 | 2        | 63938756     | G             | A            | 0.243643948   | YES     |
| PGS000662_hmPOS_GRCh37 | 2        | 66652885     | T             | C            | 0.159911493   | YES     |
| PGS000662_hmPOS_GRCh37 | 2        | 85767735     | C             | T            | 0.085899411   | YES     |
| PGS000662_hmPOS_GRCh37 | 2        | 111861993    | A             | T            | 0.095280687   | NO      |
| PGS000662_hmPOS_GRCh37 | 2        | 111893096    | T             | G            | 0.058380501   | YES     |
| PGS000662_hmPOS_GRCh37 | 2        | 121103598    | T             | C            | 0.08789715    | YES     |
| PGS000662_hmPOS_GRCh37 | 2        | 121373466    | G             | A            | 0.065252998   | YES     |
| PGS000662_hmPOS_GRCh37 | 2        | 169012955    | C             | T            | 0.059835828   | YES     |
| PGS000662_hmPOS_GRCh37 | 2        | 173319930    | C             | T            | 0.229445977   | YES     |
| PGS000662_hmPOS_GRCh37 | 2        | 174234547    | C             | T            | 0.056961427   | YES     |
| PGS000662_hmPOS_GRCh37 | 2        | 202126615    | G             | A            | 0.050616031   | YES     |
| PGS000662_hmPOS_GRCh37 | 2        | 208118301    | C             | T            | 0.050644581   | YES     |
| PGS000662_hmPOS_GRCh37 | 2        | 238411293    | C             | T            | 0.133853627   | YES     |
| PGS000662_hmPOS_GRCh37 | 2        | 238443226    | G             | A            | 0.062186442   | YES     |
| PGS000662_hmPOS_GRCh37 | 2        | 242135265    | A             | G            | 0.283885104   | YES     |
| PGS000662_hmPOS_GRCh37 | 2        | 242139600    | G             | A            | 0.359062222   | YES     |



|                        |   |           |   |        |             |     |
|------------------------|---|-----------|---|--------|-------------|-----|
| PGS000662_hmPOS_GRCh37 | 2 | 242141719 | C | T      | 0.053496477 | YES |
| PGS000662_hmPOS_GRCh37 | 2 | 242157241 | A | G      | 0.11056242  | YES |
| PGS000662_hmPOS_GRCh37 | 3 | 18738940  | A | G      | 0.059491057 | YES |
| PGS000662_hmPOS_GRCh37 | 3 | 23153062  | A | C      | 0.06163615  | YES |
| PGS000662_hmPOS_GRCh37 | 3 | 49621719  | A | AT     | 0.068887973 | NO  |
| PGS000662_hmPOS_GRCh37 | 3 | 70796696  | T | C      | 0.041720931 | YES |
| PGS000662_hmPOS_GRCh37 | 3 | 87144017  | G | A      | 0.164627225 | YES |
| PGS000662_hmPOS_GRCh37 | 3 | 87175984  | C | T      | 0.093723754 | YES |
| PGS000662_hmPOS_GRCh37 | 3 | 87399362  | A | G      | 0.15607593  | YES |
| PGS000662_hmPOS_GRCh37 | 3 | 106962521 | G | C      | 0.047017378 | NO  |
| PGS000662_hmPOS_GRCh37 | 3 | 107193337 | C | T      | 0.081504805 | YES |
| PGS000662_hmPOS_GRCh37 | 3 | 113300183 | A | T      | 0.084309919 | NO  |
| PGS000662_hmPOS_GRCh37 | 3 | 127898501 | C | A      | 0.101362283 | YES |
| PGS000662_hmPOS_GRCh37 | 3 | 128213994 | G | A      | 0.093750697 | YES |
| PGS000662_hmPOS_GRCh37 | 3 | 137562823 | A | G      | 0.047975041 | YES |
| PGS000662_hmPOS_GRCh37 | 3 | 141147414 | C | T      | 0.05209769  | YES |
| PGS000662_hmPOS_GRCh37 | 3 | 152011746 | C | CAT    | 0.088057213 | NO  |
| PGS000662_hmPOS_GRCh37 | 3 | 169482335 | T | C      | 0.07375821  | YES |
| PGS000662_hmPOS_GRCh37 | 3 | 170074517 | G | C      | 0.190119611 | NO  |
| PGS000662_hmPOS_GRCh37 | 3 | 170083541 | C | CTTTTT | 0.10473957  | NO  |
| PGS000662_hmPOS_GRCh37 | 3 | 172381777 | C | T      | 0.0546219   | YES |
| PGS000662_hmPOS_GRCh37 | 4 | 74442349  | G | C      | 0.204832836 | NO  |
| PGS000662_hmPOS_GRCh37 | 4 | 74477135  | T | A      | 0.07520493  | NO  |
| PGS000662_hmPOS_GRCh37 | 4 | 95544718  | G | A      | 0.077460586 | YES |
| PGS000662_hmPOS_GRCh37 | 4 | 106061534 | C | A      | 0.097055643 | YES |
| PGS000662_hmPOS_GRCh37 | 4 | 106064754 | C | T      | 0.079845258 | YES |
| PGS000662_hmPOS_GRCh37 | 4 | 140948835 | C | T      | 0.060799244 | YES |
| PGS000662_hmPOS_GRCh37 | 4 | 146879237 | G | A      | 0.064685356 | YES |
| PGS000662_hmPOS_GRCh37 | 4 | 152030340 | T | C      | 0.085442782 | YES |
| PGS000662_hmPOS_GRCh37 | 5 | 1280028   | G | A      | 0.135158159 | YES |
| PGS000662_hmPOS_GRCh37 | 5 | 1292118   | A | G      | 0.172287838 | YES |
| PGS000662_hmPOS_GRCh37 | 5 | 1294086   | T | C      | 0.072437187 | YES |
| PGS000662_hmPOS_GRCh37 | 5 | 1891174   | G | C      | 0.138338763 | NO  |
| PGS000662_hmPOS_GRCh37 | 5 | 14372363  | T | TGA    | 0.056987101 | NO  |
| PGS000662_hmPOS_GRCh37 | 5 | 37833419  | T | C      | 0.038762919 | YES |
| PGS000662_hmPOS_GRCh37 | 5 | 44368506  | T | C      | 0.039043082 | YES |
| PGS000662_hmPOS_GRCh37 | 5 | 56087910  | A | G      | 0.051060896 | YES |
| PGS000662_hmPOS_GRCh37 | 5 | 133836209 | T | C      | 0.077994327 | YES |
| PGS000662_hmPOS_GRCh37 | 5 | 169172133 | A | G      | 0.275653809 | YES |
| PGS000662_hmPOS_GRCh37 | 5 | 172959030 | C | A      | 0.042565359 | YES |
| PGS000662_hmPOS_GRCh37 | 5 | 177683905 | G | A      | 0.104830802 | YES |
| PGS000662_hmPOS_GRCh37 | 5 | 177891551 | G | A      | 0.050421302 | YES |
| PGS000662_hmPOS_GRCh37 | 6 | 1670985   | A | G      | 0.044086511 | YES |
| PGS000662_hmPOS_GRCh37 | 6 | 11217897  | T | C      | 0.066566318 | YES |
| PGS000662_hmPOS_GRCh37 | 6 | 21330689  | C | T      | 0.089547244 | YES |
| PGS000662_hmPOS_GRCh37 | 6 | 21471490  | G | A      | 0.058062324 | YES |
| PGS000662_hmPOS_GRCh37 | 6 | 21878849  | A | C      | 0.043143107 | YES |
| PGS000662_hmPOS_GRCh37 | 6 | 26649831  | C | CT     | 0.044483881 | NO  |

|                        |   |           |    |         |              |     |
|------------------------|---|-----------|----|---------|--------------|-----|
| PGS000662_hmPOS_GRCh37 | 6 | 30216712  | C  | T       | 0.045601728  | YES |
| PGS000662_hmPOS_GRCh37 | 6 | 32652620  | A  | G       | 0.049032422  | YES |
| PGS000662_hmPOS_GRCh37 | 6 | 34793124  | A  | G       | 0.04748673   | YES |
| PGS000662_hmPOS_GRCh37 | 6 | 41536587  | G  | T       | 0.10184104   | YES |
| PGS000662_hmPOS_GRCh37 | 6 | 43709785  | C  | T       | 0.041792627  | YES |
| PGS000662_hmPOS_GRCh37 | 6 | 76495882  | A  | G       | 0.077914375  | YES |
| PGS000662_hmPOS_GRCh37 | 6 | 109295293 | C  | T       | 0.073721053  | YES |
| PGS000662_hmPOS_GRCh37 | 6 | 117200434 | C  | A       | 0.146268108  | YES |
| PGS000662_hmPOS_GRCh37 | 6 | 134292718 | G  | GTGTTGT | 0.049325055  | NO  |
| PGS000662_hmPOS_GRCh37 | 6 | 153447516 | C  | T       | 0.072334334  | YES |
| PGS000662_hmPOS_GRCh37 | 6 | 160150279 | C  | T       | 0.065796318  | YES |
| PGS000662_hmPOS_GRCh37 | 6 | 160581544 | TG | T       | 0.190781896  | NO  |
| PGS000662_hmPOS_GRCh37 | 7 | 1928159   | T  | C       | 0.044010136  | YES |
| PGS000662_hmPOS_GRCh37 | 7 | 20414111  | T  | TA      | 0.048596315  | NO  |
| PGS000662_hmPOS_GRCh37 | 7 | 20999211  | C  | A       | 0.088812729  | YES |
| PGS000662_hmPOS_GRCh37 | 7 | 21812043  | T  | G       | 0.049687897  | YES |
| PGS000662_hmPOS_GRCh37 | 7 | 27564862  | A  | C       | 0.06707809   | YES |
| PGS000662_hmPOS_GRCh37 | 7 | 27976563  | G  | A       | 0.111327016  | YES |
| PGS000662_hmPOS_GRCh37 | 7 | 40877473  | A  | G       | 0.080139298  | YES |
| PGS000662_hmPOS_GRCh37 | 7 | 47451918  | A  | T       | 0.051018785  | NO  |
| PGS000662_hmPOS_GRCh37 | 7 | 92577760  | C  | T       | 0.056403933  | YES |
| PGS000662_hmPOS_GRCh37 | 7 | 97688440  | A  | G       | 0.101354017  | YES |
| PGS000662_hmPOS_GRCh37 | 8 | 8498803   | G  | A       | 0.061774284  | YES |
| PGS000662_hmPOS_GRCh37 | 8 | 11217455  | C  | T       | 0.048335618  | YES |
| PGS000662_hmPOS_GRCh37 | 8 | 23470785  | A  | G       | 0.072294359  | YES |
| PGS000662_hmPOS_GRCh37 | 8 | 23529521  | G  | A       | 0.169346695  | YES |
| PGS000662_hmPOS_GRCh37 | 8 | 25894202  | C  | CCAAA   | 0.077048439  | NO  |
| PGS000662_hmPOS_GRCh37 | 8 | 26063165  | A  | C       | 0.060975403  | YES |
| PGS000662_hmPOS_GRCh37 | 8 | 38644914  | A  | G       | 0.045607893  | YES |
| PGS000662_hmPOS_GRCh37 | 8 | 108923107 | G  | A       | 0.058608641  | YES |
| PGS000662_hmPOS_GRCh37 | 8 | 127836926 | C  | CAA     | 0.034625563  | NO  |
| PGS000662_hmPOS_GRCh37 | 8 | 127901649 | G  | A       | 0.089020363  | YES |
| PGS000662_hmPOS_GRCh37 | 8 | 127922200 | A  | T       | -0.149935287 | NO  |
| PGS000662_hmPOS_GRCh37 | 8 | 128027954 | G  | A       | 0.18129333   | YES |
| PGS000662_hmPOS_GRCh37 | 8 | 128074815 | T  | A       | 0.735882073  | NO  |
| PGS000662_hmPOS_GRCh37 | 8 | 128077146 | A  | G       | 0.637777711  | YES |
| PGS000662_hmPOS_GRCh37 | 8 | 128103969 | T  | C       | 0.374930958  | YES |
| PGS000662_hmPOS_GRCh37 | 8 | 128104117 | G  | A       | 0.819477616  | YES |
| PGS000662_hmPOS_GRCh37 | 8 | 128104218 | G  | A       | 0.097171134  | YES |
| PGS000662_hmPOS_GRCh37 | 8 | 128325355 | T  | C       | 0.056212284  | YES |
| PGS000662_hmPOS_GRCh37 | 8 | 128342866 | A  | G       | 0.114037591  | YES |
| PGS000662_hmPOS_GRCh37 | 8 | 128413305 | G  | T       | 0.159518618  | YES |
| PGS000662_hmPOS_GRCh37 | 8 | 128532137 | T  | C       | 0.349467374  | YES |
| PGS000662_hmPOS_GRCh37 | 8 | 128535543 | T  | C       | 0.162669308  | YES |
| PGS000662_hmPOS_GRCh37 | 8 | 128540776 | C  | G       | 0.178710296  | NO  |
| PGS000662_hmPOS_GRCh37 | 9 | 18554773  | C  | T       | 0.051895692  | YES |
| PGS000662_hmPOS_GRCh37 | 9 | 19072246  | C  | A       | 0.058761512  | YES |
| PGS000662_hmPOS_GRCh37 | 9 | 22041998  | G  | C       | 0.075703052  | NO  |

|                        |    |           |   |    |             |     |
|------------------------|----|-----------|---|----|-------------|-----|
| PGS000662_hmPOS_GRCh37 | 9  | 34049779  | T | A  | 0.052259971 | NO  |
| PGS000662_hmPOS_GRCh37 | 9  | 82090724  | T | TG | 0.078426239 | NO  |
| PGS000662_hmPOS_GRCh37 | 9  | 109532734 | A | G  | 0.052079327 | YES |
| PGS000662_hmPOS_GRCh37 | 9  | 110144887 | C | T  | 0.072440511 | YES |
| PGS000662_hmPOS_GRCh37 | 9  | 110290217 | G | A  | 0.26518417  | YES |
| PGS000662_hmPOS_GRCh37 | 9  | 130430116 | A | G  | 0.04198732  | YES |
| PGS000662_hmPOS_GRCh37 | 9  | 132573536 | T | G  | 0.059682543 | YES |
| PGS000662_hmPOS_GRCh37 | 10 | 838636    | T | C  | 0.089270754 | YES |
| PGS000662_hmPOS_GRCh37 | 10 | 46104943  | A | C  | 0.118993393 | YES |
| PGS000662_hmPOS_GRCh37 | 10 | 47599029  | T | C  | 0.116991363 | YES |
| PGS000662_hmPOS_GRCh37 | 10 | 51549496  | T | C  | 0.203974916 | YES |
| PGS000662_hmPOS_GRCh37 | 10 | 80236999  | C | A  | 0.121628628 | YES |
| PGS000662_hmPOS_GRCh37 | 10 | 80835998  | C | T  | 0.09074034  | YES |
| PGS000662_hmPOS_GRCh37 | 10 | 90195149  | C | T  | 0.045668292 | YES |
| PGS000662_hmPOS_GRCh37 | 10 | 104428716 | C | T  | 0.077375055 | YES |
| PGS000662_hmPOS_GRCh37 | 10 | 114711755 | T | C  | 0.046793119 | YES |
| PGS000662_hmPOS_GRCh37 | 10 | 122794926 | A | G  | 0.060375465 | YES |
| PGS000662_hmPOS_GRCh37 | 10 | 122834482 | C | T  | 0.222648065 | YES |
| PGS000662_hmPOS_GRCh37 | 10 | 123054018 | T | A  | 0.061850323 | NO  |
| PGS000662_hmPOS_GRCh37 | 10 | 123185303 | A | G  | 0.133130115 | YES |
| PGS000662_hmPOS_GRCh37 | 10 | 126697494 | C | G  | 0.061056764 | NO  |
| PGS000662_hmPOS_GRCh37 | 11 | 1507512   | T | C  | 0.056092669 | YES |
| PGS000662_hmPOS_GRCh37 | 11 | 2234093   | T | C  | 0.160859609 | YES |
| PGS000662_hmPOS_GRCh37 | 11 | 7547587   | A | G  | 0.104991688 | YES |
| PGS000662_hmPOS_GRCh37 | 11 | 47428210  | T | TA | 0.051908161 | NO  |
| PGS000662_hmPOS_GRCh37 | 11 | 58902679  | G | A  | 0.128657643 | YES |
| PGS000662_hmPOS_GRCh37 | 11 | 61908440  | C | T  | 0.058255547 | YES |
| PGS000662_hmPOS_GRCh37 | 11 | 66951965  | C | G  | 0.130217912 | NO  |
| PGS000662_hmPOS_GRCh37 | 11 | 68882926  | T | C  | 0.051637519 | YES |
| PGS000662_hmPOS_GRCh37 | 11 | 68980788  | A | G  | 0.092296194 | YES |
| PGS000662_hmPOS_GRCh37 | 11 | 69002342  | C | T  | 0.240823718 | YES |
| PGS000662_hmPOS_GRCh37 | 11 | 69463273  | A | G  | 0.16915579  | YES |
| PGS000662_hmPOS_GRCh37 | 11 | 76267331  | T | G  | 0.059160904 | YES |
| PGS000662_hmPOS_GRCh37 | 11 | 102401661 | T | C  | 0.07934903  | YES |
| PGS000662_hmPOS_GRCh37 | 11 | 108357137 | A | G  | 0.144979413 | YES |
| PGS000662_hmPOS_GRCh37 | 11 | 113700547 | C | CA | 0.069578734 | NO  |
| PGS000662_hmPOS_GRCh37 | 11 | 125054793 | T | C  | 0.285947593 | YES |
| PGS000662_hmPOS_GRCh37 | 11 | 134266372 | G | A  | 0.073446603 | YES |
| PGS000662_hmPOS_GRCh37 | 12 | 12871099  | T | G  | 0.056424874 | YES |
| PGS000662_hmPOS_GRCh37 | 12 | 12877983  | A | G  | 0.076447621 | YES |
| PGS000662_hmPOS_GRCh37 | 12 | 14416918  | G | A  | 0.06097533  | YES |
| PGS000662_hmPOS_GRCh37 | 12 | 48419618  | A | C  | 0.093020927 | YES |
| PGS000662_hmPOS_GRCh37 | 12 | 49672714  | G | A  | 0.077256564 | YES |
| PGS000662_hmPOS_GRCh37 | 12 | 53308932  | A | C  | 0.165492625 | YES |
| PGS000662_hmPOS_GRCh37 | 12 | 53329231  | T | C  | 0.301244267 | YES |
| PGS000662_hmPOS_GRCh37 | 12 | 65012824  | T | C  | 0.062609474 | YES |
| PGS000662_hmPOS_GRCh37 | 12 | 90156377  | A | G  | 0.070819974 | YES |
| PGS000662_hmPOS_GRCh37 | 12 | 102446675 | G | T  | 0.047788788 | YES |

|                        |    |           |    |       |             |     |
|------------------------|----|-----------|----|-------|-------------|-----|
| PGS000662_hmPOS_GRCh37 | 12 | 114685571 | A  | G     | 0.073524623 | YES |
| PGS000662_hmPOS_GRCh37 | 12 | 133067989 | G  | A     | 0.062621956 | YES |
| PGS000662_hmPOS_GRCh37 | 13 | 51076440  | T  | C     | 0.056105531 | YES |
| PGS000662_hmPOS_GRCh37 | 13 | 73716861  | C  | T     | 0.102183238 | YES |
| PGS000662_hmPOS_GRCh37 | 13 | 73995877  | G  | C     | 0.093202538 | NO  |
| PGS000662_hmPOS_GRCh37 | 13 | 110360784 | T  | C     | 0.424306385 | YES |
| PGS000662_hmPOS_GRCh37 | 14 | 23305649  | T  | C     | 0.049570527 | YES |
| PGS000662_hmPOS_GRCh37 | 14 | 37136194  | G  | A     | 0.06401016  | YES |
| PGS000662_hmPOS_GRCh37 | 14 | 38144592  | G  | A     | 0.046312065 | YES |
| PGS000662_hmPOS_GRCh37 | 14 | 53387109  | G  | T     | 0.088312271 | YES |
| PGS000662_hmPOS_GRCh37 | 14 | 61106699  | G  | A     | 0.074161166 | YES |
| PGS000662_hmPOS_GRCh37 | 14 | 64687926  | T  | C     | 0.067314721 | YES |
| PGS000662_hmPOS_GRCh37 | 14 | 68923908  | A  | G     | 0.057335106 | YES |
| PGS000662_hmPOS_GRCh37 | 14 | 69134264  | G  | A     | 0.052936267 | YES |
| PGS000662_hmPOS_GRCh37 | 14 | 70756333  | G  | A     | 0.048120875 | YES |
| PGS000662_hmPOS_GRCh37 | 15 | 40965044  | G  | A     | 0.066596828 | YES |
| PGS000662_hmPOS_GRCh37 | 15 | 56385868  | A  | G     | 0.178845155 | YES |
| PGS000662_hmPOS_GRCh37 | 15 | 66835704  | G  | A     | 0.062171559 | YES |
| PGS000662_hmPOS_GRCh37 | 15 | 66942093  | A  | C     | 0.093921349 | YES |
| PGS000662_hmPOS_GRCh37 | 15 | 70668824  | A  | C     | 0.048031342 | YES |
| PGS000662_hmPOS_GRCh37 | 16 | 54469331  | T  | C     | 0.04788069  | YES |
| PGS000662_hmPOS_GRCh37 | 16 | 54678305  | C  | T     | 0.060498718 | YES |
| PGS000662_hmPOS_GRCh37 | 16 | 57654576  | C  | T     | 0.142619205 | YES |
| PGS000662_hmPOS_GRCh37 | 16 | 79847632  | C  | T     | 0.08751587  | YES |
| PGS000662_hmPOS_GRCh37 | 16 | 82166181  | C  | T     | 0.044136641 | YES |
| PGS000662_hmPOS_GRCh37 | 17 | 618965    | C  | T     | 0.082495207 | YES |
| PGS000662_hmPOS_GRCh37 | 17 | 7571752   | G  | T     | 0.23290835  | YES |
| PGS000662_hmPOS_GRCh37 | 17 | 7803118   | C  | T     | 0.157114393 | YES |
| PGS000662_hmPOS_GRCh37 | 17 | 12585459  | A  | G     | 0.059475847 | YES |
| PGS000662_hmPOS_GRCh37 | 17 | 30092898  | G  | A     | 0.061679544 | YES |
| PGS000662_hmPOS_GRCh37 | 17 | 36047417  | A  | G     | 0.060811983 | YES |
| PGS000662_hmPOS_GRCh37 | 17 | 36074979  | G  | A     | 0.110163448 | YES |
| PGS000662_hmPOS_GRCh37 | 17 | 36103565  | A  | G     | 0.206472276 | YES |
| PGS000662_hmPOS_GRCh37 | 17 | 46805705  | T  | C     | 1.380384131 | YES |
| PGS000662_hmPOS_GRCh37 | 17 | 47380305  | T  | C     | 0.053949366 | YES |
| PGS000662_hmPOS_GRCh37 | 17 | 47398245  | T  | C     | 0.114231832 | YES |
| PGS000662_hmPOS_GRCh37 | 17 | 56426027  | T  | C     | 0.04254438  | YES |
| PGS000662_hmPOS_GRCh37 | 17 | 69117533  | G  | GTTAT | 0.157548071 | NO  |
| PGS000662_hmPOS_GRCh37 | 18 | 51771322  | C  | T     | 0.044999533 | YES |
| PGS000662_hmPOS_GRCh37 | 18 | 56745999  | G  | C     | 0.044548356 | NO  |
| PGS000662_hmPOS_GRCh37 | 18 | 60961194  | CT | C     | 0.051201137 | NO  |
| PGS000662_hmPOS_GRCh37 | 18 | 73035513  | T  | G     | 0.039953327 | YES |
| PGS000662_hmPOS_GRCh37 | 18 | 76770820  | A  | G     | 0.08337745  | YES |
| PGS000662_hmPOS_GRCh37 | 19 | 17228554  | C  | T     | 0.054648648 | YES |
| PGS000662_hmPOS_GRCh37 | 19 | 32168343  | C  | T     | 0.079224515 | YES |
| PGS000662_hmPOS_GRCh37 | 19 | 38548094  | G  | T     | 0.067520462 | YES |
| PGS000662_hmPOS_GRCh37 | 19 | 38738130  | G  | C     | 0.091003863 | NO  |
| PGS000662_hmPOS_GRCh37 | 19 | 41985931  | T  | A     | 0.086138393 | NO  |

|                        |    |          |               |    |             |     |
|------------------------|----|----------|---------------|----|-------------|-----|
| PGS000662_hmPOS_GRCh37 | 19 | 51345568 | G             | C  | 0.100157886 | NO  |
| PGS000662_hmPOS_GRCh37 | 19 | 51361382 | G             | A  | 0.131928692 | YES |
| PGS000662_hmPOS_GRCh37 | 19 | 51362715 | T             | G  | 0.266769802 | YES |
| PGS000662_hmPOS_GRCh37 | 20 | 867324   | A             | G  | 0.04275786  | YES |
| PGS000662_hmPOS_GRCh37 | 20 | 31347513 | C             | CA | 0.046670938 | NO  |
| PGS000662_hmPOS_GRCh37 | 20 | 34006970 | C             | T  | 0.04968154  | YES |
| PGS000662_hmPOS_GRCh37 | 20 | 49548807 | T             | C  | 0.116771813 | YES |
| PGS000662_hmPOS_GRCh37 | 20 | 52464719 | C             | T  | 0.06358626  | YES |
| PGS000662_hmPOS_GRCh37 | 20 | 61001062 | TGGCAGTGGCAGC | T  | 0.044630049 | NO  |
| PGS000662_hmPOS_GRCh37 | 20 | 62229989 | A             | G  | 0.05314199  | YES |
| PGS000662_hmPOS_GRCh37 | 20 | 62307517 | A             | G  | 0.106016091 | YES |
| PGS000662_hmPOS_GRCh37 | 20 | 62374389 | C             | T  | 0.112172341 | YES |
| PGS000662_hmPOS_GRCh37 | 21 | 40296411 | C             | T  | 0.05185068  | YES |
| PGS000662_hmPOS_GRCh37 | 21 | 42866332 | A             | G  | 0.232397366 | YES |
| PGS000662_hmPOS_GRCh37 | 21 | 42882462 | C             | T  | 0.091599366 | YES |
| PGS000662_hmPOS_GRCh37 | 22 | 19749525 | G             | A  | 0.05750687  | YES |
| PGS000662_hmPOS_GRCh37 | 22 | 28888939 | A             | G  | 0.146472871 | YES |
| PGS000662_hmPOS_GRCh37 | 22 | 29091147 | C             | A  | 0.466208291 | YES |
| PGS000662_hmPOS_GRCh37 | 22 | 29091857 | A             | AG | 0.390205621 | NO  |
| PGS000662_hmPOS_GRCh37 | 22 | 39138332 | G             | A  | 0.153105391 | YES |
| PGS000662_hmPOS_GRCh37 | 22 | 40499107 | T             | A  | 0.072436521 | NO  |
| PGS000662_hmPOS_GRCh37 | 22 | 43499741 | G             | A  | 0.154456689 | YES |
| PGS000662_hmPOS_GRCh37 | 22 | 43500212 | G             | T  | 0.120809585 | YES |
| PGS000662_hmPOS_GRCh37 | 22 | 45698149 | T             | A  | 0.047012421 | NO  |
| PGS000662_hmPOS_GRCh37 | X  | 9811095  | A             | G  | 0.05607936  | YES |
| PGS000662_hmPOS_GRCh37 | X  | 11482634 | C             | T  | 0.059017309 | YES |
| PGS000662_hmPOS_GRCh37 | X  | 30896320 | T             | C  | 0.032547584 | YES |
| PGS000662_hmPOS_GRCh37 | X  | 51245277 | GA            | G  | 0.099701455 | NO  |
| PGS000662_hmPOS_GRCh37 | X  | 52695895 | G             | A  | 0.054267213 | YES |
| PGS000662_hmPOS_GRCh37 | X  | 54454406 | A             | G  | 0.048769606 | YES |
| PGS000662_hmPOS_GRCh37 | X  | 66825357 | T             | C  | 0.077895055 | YES |
| PGS000662_hmPOS_GRCh37 | X  | 70139908 | A             | G  | 0.05554748  | YES |

Abbreviations: SNP, Single nucleotide polymorphism; PRS, polygenic risk score.

Total number of variants: 269

Matched, n (%): 219 (81.41%)

Exclusions due to ambiguously matched, n (%): 27 (10.04%)

Exclusions due to unmatched, n (%): 23 (8.55%)

**eTable S7. List of SNPs included in brain cancer PRS**

| <b>Accession</b>       | <b>Chr name</b> | <b>Chr position</b> | <b>Effect allele</b> | <b>Other allele</b> | <b>Effect weight</b> | <b>Include</b> |
|------------------------|-----------------|---------------------|----------------------|---------------------|----------------------|----------------|
| PGS000624_hmPOS_GRCh37 | 5               | 1279790             | T                    | C                   | 0.476234179          | YES            |
| PGS000624_hmPOS_GRCh37 | 7               | 54916280            | G                    | T                   | 0.488580015          | YES            |
| PGS000624_hmPOS_GRCh37 | 9               | 22032152            | G                    | T                   | 0.31481074           | YES            |
| PGS000624_hmPOS_GRCh37 | 17              | 7571752             | G                    | T                   | 0.966983846          | YES            |
| PGS000624_hmPOS_GRCh37 | 20              | 62312299            | C                    | T                   | 0.392042088          | YES            |

Abbreviations: SNP, Single nucleotide polymorphism; PRS, polygenic risk score.

Total number of variants: 5

Matched, n (%): 5 (0%)

Exclusions due to ambiguously matched, n (%): 0 (0%)

Exclusions due to unmatched, n (%): 0 (0%)

**eTable S8. List of SNPs included in head and neck cancer PRS**

| Accession              | Chr name | Chr position | Effect allele | Other allele | Effect weight | Include |
|------------------------|----------|--------------|---------------|--------------|---------------|---------|
| PGS000792_hmPOS_GRCh37 | 2        | 27855924     | G             | A            | 5.49          | YES     |
| PGS000792_hmPOS_GRCh37 | 4        | 84374480     | C             | T            | 5.73          | YES     |
| PGS000792_hmPOS_GRCh37 | 4        | 100239319    | G             | A            | 7.18          | YES     |
| PGS000792_hmPOS_GRCh37 | 4        | 100341861    | G             | A            | 8.32          | YES     |
| PGS000792_hmPOS_GRCh37 | 5        | 1336221      | G             | A            | 5.89          | YES     |
| PGS000792_hmPOS_GRCh37 | 5        | 1343794      | C             | T            | 6.09          | YES     |
| PGS000792_hmPOS_GRCh37 | 6        | 32587300     | G             | A            | 6.06          | YES     |
| PGS000792_hmPOS_GRCh37 | 6        | 32620838     | C             | G            | 5.91          | NO      |
| PGS000792_hmPOS_GRCh37 | 6        | 32633287     | T             | C            | 6.15          | YES     |
| PGS000792_hmPOS_GRCh37 | 6        | 32635219     | A             | G            | 5.78          | YES     |
| PGS000792_hmPOS_GRCh37 | 6        | 32636120     | C             | T            | 7.44          | YES     |
| PGS000792_hmPOS_GRCh37 | 9        | 22060136     | A             | G            | 5.79          | YES     |
| PGS000792_hmPOS_GRCh37 | 9        | 133952024    | G             | A            | 5.6           | YES     |
| PGS000792_hmPOS_GRCh37 | 12       | 112521448    | A             | G            | 5.61          | YES     |

Abbreviations: SNP, Single nucleotide polymorphism; PRS, polygenic risk score.

Total number of variants: 14

Matched, n (%): 13 (92.86%)

Exclusions due to ambiguously matched, n (%): 1 (7.14%)

Exclusions due to unmatched, n (%): 0 (0%)

**eTable S9. List of SNPs included in lung cancer PRS**

| Accession              | Chr name | Chr position | Effect allele | Other allele | Effect weight      | Include |
|------------------------|----------|--------------|---------------|--------------|--------------------|---------|
| PGS000740_hmPOS_GRCh37 | 1        | 77967507     | A             | T            | 0.131028262        | NO      |
| PGS000740_hmPOS_GRCh37 | 3        | 189357199    | T             | G            | -0.061875404       | YES     |
| PGS000740_hmPOS_GRCh37 | 5        | 1285974      | A             | C            | 0.1133286853070032 | YES     |
| PGS000740_hmPOS_GRCh37 | 5        | 1286032      | A             | G            | 0.3293037471426003 | YES     |
| PGS000740_hmPOS_GRCh37 | 5        | 1294086      | T             | C            | 0.131028262        | YES     |
| PGS000740_hmPOS_GRCh37 | 5        | 1300025      | T             | G            | 0.076961041        | YES     |
| PGS000740_hmPOS_GRCh37 | 5        | 1322087      | T             | C            | -0.139262067       | YES     |
| PGS000740_hmPOS_GRCh37 | 5        | 1325767      | G             | A            | -0.094310679       | YES     |
| PGS000740_hmPOS_GRCh37 | 6        | 28322296     | G             | A            | 0.067658648        | NO      |
| PGS000740_hmPOS_GRCh37 | 6        | 31434111     | G             | A            | 0.1397619423751586 | YES     |
| PGS000740_hmPOS_GRCh37 | 6        | 31472720     | T             | G            | 0.048790164        | NO      |
| PGS000740_hmPOS_GRCh37 | 6        | 31628733     | T             | C            | 0.067658648        | YES     |
| PGS000740_hmPOS_GRCh37 | 6        | 31678774     | A             | G            | -0.105360516       | YES     |
| PGS000740_hmPOS_GRCh37 | 6        | 32590925     | A             | G            | 0.1133286853070032 | YES     |
| PGS000740_hmPOS_GRCh37 | 6        | 32635629     | A             | G            | 0.058268908        | NO      |
| PGS000740_hmPOS_GRCh37 | 6        | 167376466    | C             | G            | 0.067658648        | NO      |
| PGS000740_hmPOS_GRCh37 | 8        | 27344719     | A             | G            | -0.139262067       | YES     |
| PGS000740_hmPOS_GRCh37 | 8        | 32410110     | G             | A            | 0.067658648        | YES     |
| PGS000740_hmPOS_GRCh37 | 9        | 21830157     | G             | A            | 0.086177696        | YES     |
| PGS000740_hmPOS_GRCh37 | 9        | 136503819    | T             | C            | -0.040821995       | YES     |
| PGS000740_hmPOS_GRCh37 | 10       | 105687632    | C             | A            | 0.067658648        | YES     |
| PGS000740_hmPOS_GRCh37 | 11       | 118125625    | T             | C            | 0.067658648        | YES     |
| PGS000740_hmPOS_GRCh37 | 12       | 998819       | C             | G            | -0.083381609       | NO      |
| PGS000740_hmPOS_GRCh37 | 13       | 32972626     | T             | A            | 0.4700036292457356 | NO      |
| PGS000740_hmPOS_GRCh37 | 15       | 43762196     | T             | C            | -0.072570693       | YES     |
| PGS000740_hmPOS_GRCh37 | 15       | 47577451     | A             | G            | 0.067658648        | YES     |
| PGS000740_hmPOS_GRCh37 | 15       | 49376624     | G             | T            | -0.083381609       | YES     |
| PGS000740_hmPOS_GRCh37 | 15       | 78825917     | G             | A            | 0.1570037488096647 | YES     |
| PGS000740_hmPOS_GRCh37 | 15       | 78857986     | G             | C            | 0.262364264        | NO      |
| PGS000740_hmPOS_GRCh37 | 15       | 79089734     | C             | T            | 0.1222176327242491 | YES     |
| PGS000740_hmPOS_GRCh37 | 17       | 28263980     | G             | A            | 0.029558802        | NO      |
| PGS000740_hmPOS_GRCh37 | 17       | 72938100     | T             | C            | 0.039220713        | YES     |
| PGS000740_hmPOS_GRCh37 | 19       | 41353107     | T             | C            | -0.127833372       | YES     |
| PGS000740_hmPOS_GRCh37 | 20       | 62326579     | T             | G            | 0.076961041        | YES     |
| PGS000740_hmPOS_GRCh37 | 22       | 29121087     | G             | A            | -0.510825624       | YES     |
| PGS000740_hmPOS_GRCh37 | 1        | 78743005     | A             | T            | 0.029558802        | NO      |
| PGS000740_hmPOS_GRCh37 | 1        | 154566225    | C             | T            | -0.051293294       | YES     |
| PGS000740_hmPOS_GRCh37 | 1        | 168511081    | A             | G            | -0.051293294       | YES     |
| PGS000740_hmPOS_GRCh37 | 2        | 38567201     | C             | T            | 0.039220713        | YES     |
| PGS000740_hmPOS_GRCh37 | 2        | 45189737     | T             | C            | 0.048790164        | YES     |
| PGS000740_hmPOS_GRCh37 | 2        | 67510377     | C             | T            | 0.048790164        | YES     |
| PGS000740_hmPOS_GRCh37 | 2        | 119449740    | A             | T            | 0.1570037488096647 | NO      |
| PGS000740_hmPOS_GRCh37 | 2        | 140398327    | C             | T            | -0.083381609       | YES     |
| PGS000740_hmPOS_GRCh37 | 2        | 173983204    | A             | G            | -0.010050336       | NO      |
| PGS000740_hmPOS_GRCh37 | 2        | 174075761    | G             | A            | -0.010050336       | YES     |



|                        |    |           |   |   |                    |     |
|------------------------|----|-----------|---|---|--------------------|-----|
| PGS000740_hmPOS_GRCh37 | 4  | 67833774  | G | C | 0.058268908        | NO  |
| PGS000740_hmPOS_GRCh37 | 4  | 164007992 | G | A | -0.020202707       | YES |
| PGS000740_hmPOS_GRCh37 | 5  | 1000156   | A | G | 0.086177696        | YES |
| PGS000740_hmPOS_GRCh37 | 5  | 1249816   | T | C | 0.067658648        | YES |
| PGS000740_hmPOS_GRCh37 | 5  | 1276873   | G | A | 0.019802627        | YES |
| PGS000740_hmPOS_GRCh37 | 5  | 1287194   | G | A | 0.058268908        | YES |
| PGS000740_hmPOS_GRCh37 | 5  | 1300269   | A | G | 0.048790164        | YES |
| PGS000740_hmPOS_GRCh37 | 5  | 90250631  | T | A | -0.040821995       | NO  |
| PGS000740_hmPOS_GRCh37 | 5  | 150121458 | C | G | 0.131028262        | NO  |
| PGS000740_hmPOS_GRCh37 | 6  | 410848    | A | G | -0.040821995       | YES |
| PGS000740_hmPOS_GRCh37 | 6  | 25885814  | T | C | 0                  | YES |
| PGS000740_hmPOS_GRCh37 | 6  | 26198845  | C | G | 0                  | NO  |
| PGS000740_hmPOS_GRCh37 | 6  | 28217797  | T | G | -0.010050336       | NO  |
| PGS000740_hmPOS_GRCh37 | 6  | 29223493  | C | G | -0.235722334       | NO  |
| PGS000740_hmPOS_GRCh37 | 6  | 29477821  | T | G | 0.009950331        | YES |
| PGS000740_hmPOS_GRCh37 | 6  | 29606761  | A | G | 0                  | YES |
| PGS000740_hmPOS_GRCh37 | 6  | 29759750  | A | G | -0.020202707       | YES |
| PGS000740_hmPOS_GRCh37 | 6  | 29922740  | G | A | -0.010050336       | YES |
| PGS000740_hmPOS_GRCh37 | 6  | 30074163  | A | G | 0                  | YES |
| PGS000740_hmPOS_GRCh37 | 6  | 30864829  | C | T | 0                  | YES |
| PGS000740_hmPOS_GRCh37 | 6  | 31002452  | G | A | -0.020202707       | YES |
| PGS000740_hmPOS_GRCh37 | 6  | 31067852  | G | A | 0.019802627        | YES |
| PGS000740_hmPOS_GRCh37 | 6  | 31081065  | C | T | 0.009950331        | YES |
| PGS000740_hmPOS_GRCh37 | 6  | 31117577  | G | C | 0                  | NO  |
| PGS000740_hmPOS_GRCh37 | 6  | 31321429  | A | T | -0.010050336       | NO  |
| PGS000740_hmPOS_GRCh37 | 6  | 31322782  | C | G | -0.010050336       | NO  |
| PGS000740_hmPOS_GRCh37 | 6  | 31324996  | G | C | 0.009950331        | NO  |
| PGS000740_hmPOS_GRCh37 | 6  | 31412961  | C | T | 0.029558802        | YES |
| PGS000740_hmPOS_GRCh37 | 6  | 31840455  | A | G | 0                  | YES |
| PGS000740_hmPOS_GRCh37 | 6  | 32335204  | A | G | 0                  | YES |
| PGS000740_hmPOS_GRCh37 | 6  | 32609147  | T | A | -0.020202707       | NO  |
| PGS000740_hmPOS_GRCh37 | 6  | 32757737  | G | A | -0.040821995       | YES |
| PGS000740_hmPOS_GRCh37 | 6  | 32783086  | G | A | 0.029558802        | YES |
| PGS000740_hmPOS_GRCh37 | 6  | 72384541  | A | G | 0.1570037488096647 | YES |
| PGS000740_hmPOS_GRCh37 | 6  | 117734267 | G | A | -0.010050336       | YES |
| PGS000740_hmPOS_GRCh37 | 7  | 130668618 | C | T | 0.019802627        | YES |
| PGS000740_hmPOS_GRCh37 | 8  | 27327841  | C | G | 0.029558802        | NO  |
| PGS000740_hmPOS_GRCh37 | 8  | 27397087  | T | C | 0.029558802        | YES |
| PGS000740_hmPOS_GRCh37 | 8  | 144722420 | C | T | 0.039220713        | YES |
| PGS000740_hmPOS_GRCh37 | 9  | 6227418   | G | A | 0.076961041        | YES |
| PGS000740_hmPOS_GRCh37 | 9  | 17934120  | C | G | 0.019802627        | NO  |
| PGS000740_hmPOS_GRCh37 | 9  | 21959751  | C | T | 0                  | YES |
| PGS000740_hmPOS_GRCh37 | 9  | 22066572  | A | G | 0.1043600153242428 | YES |
| PGS000740_hmPOS_GRCh37 | 9  | 22083404  | C | T | 0                  | YES |
| PGS000740_hmPOS_GRCh37 | 9  | 33427322  | C | A | -0.020202707       | YES |
| PGS000740_hmPOS_GRCh37 | 9  | 102587233 | T | C | 0.1906203596086497 | YES |
| PGS000740_hmPOS_GRCh37 | 9  | 136275229 | T | C | 0.086177696        | YES |
| PGS000740_hmPOS_GRCh37 | 10 | 102011702 | A | G | 0.058268908        | YES |

|                        |    |           |   |   |                    |     |
|------------------------|----|-----------|---|---|--------------------|-----|
| PGS000740_hmPOS_GRCh37 | 10 | 102672248 | T | A | 0.067658648        | NO  |
| PGS000740_hmPOS_GRCh37 | 11 | 57250026  | T | C | -0.030459207       | YES |
| PGS000740_hmPOS_GRCh37 | 11 | 115998756 | A | G | -0.116533816       | YES |
| PGS000740_hmPOS_GRCh37 | 12 | 1036042   | T | C | -0.061875404       | YES |
| PGS000740_hmPOS_GRCh37 | 12 | 58831070  | A | G | 0                  | YES |
| PGS000740_hmPOS_GRCh37 | 12 | 64913237  | T | G | 0.048790164        | YES |
| PGS000740_hmPOS_GRCh37 | 13 | 84281063  | T | A | 0.039220713        | NO  |
| PGS000740_hmPOS_GRCh37 | 14 | 34013721  | A | G | -0.040821995       | YES |
| PGS000740_hmPOS_GRCh37 | 15 | 49253961  | C | A | -0.010050336       | YES |
| PGS000740_hmPOS_GRCh37 | 15 | 49615952  | G | C | 0.019802627        | NO  |
| PGS000740_hmPOS_GRCh37 | 15 | 70431773  | T | G | 0.058268908        | YES |
| PGS000740_hmPOS_GRCh37 | 15 | 75055819  | T | C | 0.086177696        | YES |
| PGS000740_hmPOS_GRCh37 | 15 | 78880752  | A | G | 0.048790164        | YES |
| PGS000740_hmPOS_GRCh37 | 15 | 78909398  | T | C | 0.076961041        | YES |
| PGS000740_hmPOS_GRCh37 | 15 | 78981423  | G | A | -0.094310679       | YES |
| PGS000740_hmPOS_GRCh37 | 15 | 78987225  | A | G | 0.009950331        | YES |
| PGS000740_hmPOS_GRCh37 | 15 | 79058730  | G | A | 0                  | YES |
| PGS000740_hmPOS_GRCh37 | 15 | 79065557  | G | A | -0.010050336       | YES |
| PGS000740_hmPOS_GRCh37 | 15 | 79075233  | C | T | 0                  | YES |
| PGS000740_hmPOS_GRCh37 | 15 | 79110783  | T | C | 0                  | YES |
| PGS000740_hmPOS_GRCh37 | 15 | 79198760  | G | T | -0.030459207       | YES |
| PGS000740_hmPOS_GRCh37 | 16 | 10740982  | C | G | -0.030459207       | NO  |
| PGS000740_hmPOS_GRCh37 | 16 | 26980646  | C | T | 0.1988508587451651 | YES |
| PGS000740_hmPOS_GRCh37 | 17 | 70299958  | G | T | -0.030459207       | YES |
| PGS000740_hmPOS_GRCh37 | 18 | 20741135  | C | T | 0.039220713        | YES |
| PGS000740_hmPOS_GRCh37 | 19 | 41195170  | C | T | 0.009950331        | YES |
| PGS000740_hmPOS_GRCh37 | 19 | 41207206  | G | C | 0                  | NO  |
| PGS000740_hmPOS_GRCh37 | 19 | 41334199  | A | G | -0.072570693       | YES |
| PGS000740_hmPOS_GRCh37 | 19 | 41338988  | G | C | -0.010050336       | NO  |
| PGS000740_hmPOS_GRCh37 | 19 | 41357457  | T | G | -0.15082289        | YES |
| PGS000740_hmPOS_GRCh37 | 19 | 41412192  | C | T | -0.105360516       | YES |
| PGS000740_hmPOS_GRCh37 | 19 | 54567858  | A | G | -0.010050336       | YES |
| PGS000740_hmPOS_GRCh37 | 20 | 61988382  | G | A | 0.086177696        | YES |
| PGS000740_hmPOS_GRCh37 | 20 | 62527305  | A | G | -0.094310679       | YES |

Abbreviations: SNP, Single nucleotide polymorphism; PRS, polygenic risk score.

Total number of variants: 128

Matched, n (%): 96 (75.00%)

Exclusions due to ambiguously matched, n (%): 23 (17.97%)

Exclusions due to unmatched, n (%): 9 (7.03%)

**eTable S10. List of SNPs included in endometrial cancer PRS**

| <b>Accession</b>       | <b>Chr name</b> | <b>Chr position</b> | <b>Effect allele</b> | <b>Other allele</b> | <b>Effect weight</b> | <b>Include</b> |
|------------------------|-----------------|---------------------|----------------------|---------------------|----------------------|----------------|
| PGS000786_hmPOS_GRCh37 | 6               | 21649085            | G                    | A                   | 5.59                 | YES            |
| PGS000786_hmPOS_GRCh37 | 6               | 126010116           | A                    | G                   | 7.25                 | YES            |
| PGS000786_hmPOS_GRCh37 | 8               | 129599278           | C                    | G                   | 5.93                 | NO             |
| PGS000786_hmPOS_GRCh37 | 9               | 10260263            | T                    | C                   | 5.45                 | YES            |
| PGS000786_hmPOS_GRCh37 | 13              | 73811879            | A                    | T                   | 6.95                 | NO             |
| PGS000786_hmPOS_GRCh37 | 14              | 105243220           | A                    | G                   | 5.51                 | YES            |
| PGS000786_hmPOS_GRCh37 | 15              | 40322124            | C                    | T                   | 5.63                 | YES            |
| PGS000786_hmPOS_GRCh37 | 15              | 51537806            | C                    | T                   | 7.24                 | YES            |
| PGS000786_hmPOS_GRCh37 | 17              | 36103565            | A                    | G                   | 8.98                 | YES            |

Abbreviations: SNP, Single nucleotide polymorphism; PRS, polygenic risk score.

Total number of variants: 9

Matched, n (%): 7 (77.78%)

Exclusions due to ambiguously matched, n (%): 2 (22.2%)

Exclusions due to unmatched, n (%): 0 (0%)

**eTable S11. List of SNPs included in testicular cancer PRS**

| Accession              | Chr name | Chr position | Effect allele | Other allele | Effect weight | Include |
|------------------------|----------|--------------|---------------|--------------|---------------|---------|
| PGS000796_hmPOS_GRCh37 | 1        | 9713386      | T             | C            | 7.2           | YES     |
| PGS000796_hmPOS_GRCh37 | 1        | 156169610    | G             | A            | 6.37          | YES     |
| PGS000796_hmPOS_GRCh37 | 1        | 165873392    | C             | T            | 7.64          | YES     |
| PGS000796_hmPOS_GRCh37 | 2        | 71572455     | C             | T            | 6.7           | YES     |
| PGS000796_hmPOS_GRCh37 | 2        | 182377541    | T             | C            | 5.45          | YES     |
| PGS000796_hmPOS_GRCh37 | 3        | 16625048     | A             | G            | 6.28          | YES     |
| PGS000796_hmPOS_GRCh37 | 3        | 141818850    | C             | T            | 6.04          | YES     |
| PGS000796_hmPOS_GRCh37 | 3        | 156300724    | C             | T            | 7.06          | YES     |
| PGS000796_hmPOS_GRCh37 | 3        | 169756119    | T             | C            | 5.89          | YES     |
| PGS000796_hmPOS_GRCh37 | 4        | 76520651     | G             | A            | 6.69          | YES     |
| PGS000796_hmPOS_GRCh37 | 4        | 95224812     | T             | G            | 5.71          | YES     |
| PGS000796_hmPOS_GRCh37 | 4        | 104054686    | A             | G            | 9.17          | YES     |
| PGS000796_hmPOS_GRCh37 | 4        | 188921440    | A             | G            | 7.04          | YES     |
| PGS000796_hmPOS_GRCh37 | 5        | 1286516      | A             | C            | 9.12          | YES     |
| PGS000796_hmPOS_GRCh37 | 5        | 1308552      | A             | G            | 10.82         | YES     |
| PGS000796_hmPOS_GRCh37 | 5        | 134366200    | T             | C            | 5.65          | YES     |
| PGS000796_hmPOS_GRCh37 | 5        | 141681788    | A             | G            | 14.29         | YES     |
| PGS000796_hmPOS_GRCh37 | 6        | 33542538     | G             | A            | 12.76         | YES     |
| PGS000796_hmPOS_GRCh37 | 6        | 149972132    | G             | A            | 5.98          | YES     |
| PGS000796_hmPOS_GRCh37 | 7        | 1968953      | C             | T            | 7.2           | YES     |
| PGS000796_hmPOS_GRCh37 | 7        | 40920313     | G             | C            | 6.64          | NO      |
| PGS000796_hmPOS_GRCh37 | 7        | 158501492    | T             | C            | 5.58          | YES     |
| PGS000796_hmPOS_GRCh37 | 8        | 11611500     | C             | G            | 5.66          | NO      |
| PGS000796_hmPOS_GRCh37 | 8        | 70976505     | C             | T            | 5.47          | YES     |
| PGS000796_hmPOS_GRCh37 | 9        | 845516       | A             | C            | 14.14         | YES     |
| PGS000796_hmPOS_GRCh37 | 9        | 878563       | G             | A            | 9.96          | YES     |
| PGS000796_hmPOS_GRCh37 | 10       | 126274612    | G             | C            | 5.64          | NO      |
| PGS000796_hmPOS_GRCh37 | 11       | 77997936     | T             | C            | 6.47          | YES     |
| PGS000796_hmPOS_GRCh37 | 11       | 125071163    | G             | A            | 7.02          | YES     |
| PGS000796_hmPOS_GRCh37 | 12       | 14653867     | C             | T            | 7.41          | YES     |
| PGS000796_hmPOS_GRCh37 | 12       | 32141495     | A             | G            | 6.71          | YES     |
| PGS000796_hmPOS_GRCh37 | 12       | 70563865     | A             | G            | 6.13          | YES     |
| PGS000796_hmPOS_GRCh37 | 12       | 88953561     | A             | C            | 24.18         | YES     |
| PGS000796_hmPOS_GRCh37 | 14       | 55880047     | G             | A            | 5.52          | YES     |
| PGS000796_hmPOS_GRCh37 | 15       | 56038707     | A             | G            | 6.76          | YES     |
| PGS000796_hmPOS_GRCh37 | 15       | 66821250     | G             | A            | 7.15          | YES     |
| PGS000796_hmPOS_GRCh37 | 15       | 85605427     | G             | T            | 5.47          | YES     |
| PGS000796_hmPOS_GRCh37 | 16       | 11920037     | A             | G            | 5.65          | YES     |
| PGS000796_hmPOS_GRCh37 | 16       | 15530708     | T             | G            | 7.16          | NO      |
| PGS000796_hmPOS_GRCh37 | 16       | 50142944     | G             | A            | 5.92          | YES     |
| PGS000796_hmPOS_GRCh37 | 16       | 74670458     | C             | T            | 6.9           | YES     |
| PGS000796_hmPOS_GRCh37 | 16       | 88549264     | G             | C            | 5.94          | NO      |
| PGS000796_hmPOS_GRCh37 | 17       | 36101156     | C             | T            | 9.23          | YES     |
| PGS000796_hmPOS_GRCh37 | 17       | 56632543     | T             | G            | 9.21          | YES     |
| PGS000796_hmPOS_GRCh37 | 18       | 649311       | A             | G            | 6.24          | YES     |

|                        |    |          |   |   |      |     |
|------------------------|----|----------|---|---|------|-----|
| PGS000796_hmPOS_GRCh37 | 19 | 22267849 | T | G | 5.61 | YES |
| PGS000796_hmPOS_GRCh37 | 19 | 23205184 | G | A | 7.54 | YES |
| PGS000796_hmPOS_GRCh37 | 19 | 24050828 | T | A | 6.68 | NO  |
| PGS000796_hmPOS_GRCh37 | 19 | 28257393 | G | A | 8.3  | YES |
| PGS000796_hmPOS_GRCh37 | 19 | 54284689 | T | G | 5.67 | YES |
| PGS000796_hmPOS_GRCh37 | 20 | 50708054 | T | A | 7    | NO  |
| PGS000796_hmPOS_GRCh37 | 21 | 47690068 | T | C | 6.08 | YES |

Abbreviations: SNP, Single nucleotide polymorphism; PRS, polygenic risk score.

Total number of variants: 52

Matched, n (%): 45 (86.54%)

Exclusions due to ambiguously matched, n (%): 6 (11.54%)

Exclusions due to unmatched, n (%): 1 (1.92%)

**eTable S12. List of SNPs included in thyroid cancer PRS**

| <b>Accession</b>       | <b>Chr name</b> | <b>Chr position</b> | <b>Effect allele</b> | <b>Other allele</b> | <b>Effect weight</b> | <b>Include</b> |
|------------------------|-----------------|---------------------|----------------------|---------------------|----------------------|----------------|
| PGS000797_hmPOS_GRCh37 | 1               | 233412561           | A                    | G                   | 6.6                  | YES            |
| PGS000797_hmPOS_GRCh37 | 2               | 218292158           | C                    | G                   | 10.23                | NO             |
| PGS000797_hmPOS_GRCh37 | 3               | 169518455           | T                    | C                   | 5.56                 | NO             |
| PGS000797_hmPOS_GRCh37 | 5               | 111485904           | A                    | T                   | 6.3                  | NO             |
| PGS000797_hmPOS_GRCh37 | 8               | 32432796            | G                    | T                   | 8.53                 | YES            |
| PGS000797_hmPOS_GRCh37 | 9               | 4811553             | A                    | G                   | 5.63                 | NO             |
| PGS000797_hmPOS_GRCh37 | 9               | 100537802           | A                    | C                   | 16.12                | YES            |
| PGS000797_hmPOS_GRCh37 | 10              | 105694301           | T                    | C                   | 6.56                 | YES            |
| PGS000797_hmPOS_GRCh37 | 14              | 36649246            | T                    | C                   | 9.01                 | YES            |
| PGS000797_hmPOS_GRCh37 | 14              | 36738361            | T                    | C                   | 8.29                 | YES            |
| PGS000797_hmPOS_GRCh37 | 15              | 67455630            | T                    | C                   | 5.85                 | YES            |
| PGS000797_hmPOS_GRCh37 | 15              | 67457485            | C                    | G                   | 5.93                 | NO             |

Abbreviations: SNP, Single nucleotide polymorphism; PRS, polygenic risk score.

Total number of variants: 12

Matched, n (%): 7 (58.33%)

Exclusions due to ambiguously matched, n (%): 3 (25.00%)

Exclusions due to unmatched, n (%): 2 (16.67%)

**eTable S13. List of SNPs included in kidney cancer PRS**

| Accession              | Chr name | Chr position | Effect allele | Other allele | Effect weight | Include |
|------------------------|----------|--------------|---------------|--------------|---------------|---------|
| PGS000787_hmPOS_GRCh37 | 1        | 50907438     | C             | T            | 6.29          | YES     |
| PGS000787_hmPOS_GRCh37 | 1        | 165650787    | C             | T            | 5.59          | YES     |
| PGS000787_hmPOS_GRCh37 | 2        | 46533376     | T             | C            | 7.9           | YES     |
| PGS000787_hmPOS_GRCh37 | 2        | 46558208     | G             | T            | 5.84          | YES     |
| PGS000787_hmPOS_GRCh37 | 2        | 46589295     | G             | A            | 6.34          | YES     |
| PGS000787_hmPOS_GRCh37 | 2        | 145208193    | C             | T            | 5.89          | YES     |
| PGS000787_hmPOS_GRCh37 | 3        | 40533243     | G             | A            | 5.57          | YES     |
| PGS000787_hmPOS_GRCh37 | 3        | 169536637    | T             | C            | 5.75          | YES     |
| PGS000787_hmPOS_GRCh37 | 3        | 172313367    | G             | A            | 5.49          | YES     |
| PGS000787_hmPOS_GRCh37 | 4        | 101005318    | G             | A            | 5.86          | YES     |
| PGS000787_hmPOS_GRCh37 | 8        | 22876739     | T             | C            | 5.82          | YES     |
| PGS000787_hmPOS_GRCh37 | 10       | 105682296    | T             | C            | 5.49          | YES     |
| PGS000787_hmPOS_GRCh37 | 11       | 69239741     | G             | A            | 9.65          | YES     |
| PGS000787_hmPOS_GRCh37 | 11       | 108357137    | A             | G            | 6.36          | YES     |
| PGS000787_hmPOS_GRCh37 | 12       | 26453283     | C             | T            | 8.21          | YES     |
| PGS000787_hmPOS_GRCh37 | 12       | 125320850    | T             | C            | 6.99          | YES     |
| PGS000787_hmPOS_GRCh37 | 14       | 73272730     | A             | C            | 6.55          | YES     |
| PGS000787_hmPOS_GRCh37 | 14       | 73279420     | C             | T            | 10.19         | YES     |
| PGS000787_hmPOS_GRCh37 | 22       | 47013535     | G             | A            | 5.58          | YES     |

Abbreviations: SNP, Single nucleotide polymorphism; PRS, polygenic risk score.

Total number of variants: 19

Matched, n (%): 19 (100%)

Exclusions due to ambiguously matched, n (%): 0 (0%)

Exclusions due to unmatched, n (%): 0 (0%)

**eTable S14. List of SNPs included in multiple myeloma PRS**

| Accession              | Chr name | Chr position | Effect allele | Other allele | Effect weight | Include |
|------------------------|----------|--------------|---------------|--------------|---------------|---------|
| PGS000653_hmPOS_GRCh37 | 2        | 174808899    | T             | C            | 0.113328685   | YES     |
| PGS000653_hmPOS_GRCh37 | 3        | 41786009     | C             | T            | 0.392042088   | YES     |
| PGS000653_hmPOS_GRCh37 | 3        | 169492101    | C             | T            | 0.227932068   | YES     |
| PGS000653_hmPOS_GRCh37 | 5        | 95242931     | T             | C            | 0.21511138    | YES     |
| PGS000653_hmPOS_GRCh37 | 5        | 122743325    | T             | A            | 0.104360015   | NO      |
| PGS000653_hmPOS_GRCh37 | 6        | 15244018     | G             | C            | 0.31481074    | NO      |
| PGS000653_hmPOS_GRCh37 | 6        | 31107258     | T             | C            | 0.175632569   | YES     |
| PGS000653_hmPOS_GRCh37 | 6        | 106667535    | G             | T            | 0.165514438   | YES     |
| PGS000653_hmPOS_GRCh37 | 7        | 21938240     | C             | A            | 0.357674444   | YES     |
| PGS000653_hmPOS_GRCh37 | 7        | 106291118    | C             | T            | 0.113328685   | YES     |
| PGS000653_hmPOS_GRCh37 | 7        | 124583896    | T             | C            | 0.113328685   | YES     |
| PGS000653_hmPOS_GRCh37 | 7        | 150950940    | A             | G            | 0.173953307   | YES     |
| PGS000653_hmPOS_GRCh37 | 8        | 128222421    | C             | T            | 0.122217633   | YES     |
| PGS000653_hmPOS_GRCh37 | 9        | 21991923     | C             | T            | 0.139761942   | YES     |
| PGS000653_hmPOS_GRCh37 | 10       | 28856819     | G             | A            | 0.113328685   | YES     |
| PGS000653_hmPOS_GRCh37 | 11       | 69462910     | G             | A            | 0.667829373   | YES     |
| PGS000653_hmPOS_GRCh37 | 16       | 30700858     | C             | T            | 0.139761942   | YES     |
| PGS000653_hmPOS_GRCh37 | 16       | 74664743     | T             | C            | 0.122217633   | YES     |
| PGS000653_hmPOS_GRCh37 | 17       | 16820099     | A             | G            | 0.36          | YES     |
| PGS000653_hmPOS_GRCh37 | 19       | 16438661     | T             | A            | 0.131028262   | NO      |
| PGS000653_hmPOS_GRCh37 | 20       | 47355009     | C             | T            | 0.231111721   | YES     |
| PGS000653_hmPOS_GRCh37 | 22       | 39542292     | A             | G            | 0.20538683    | YES     |

Abbreviations: SNP, Single nucleotide polymorphism; PRS, polygenic risk score.

Total number of variants: 22

Matched, n (%): 19 (86.36%)

Exclusions due to ambiguously matched, n (%): 3 (13.64%)

Exclusions due to unmatched, n (%): 0 (0%)



**eTable S15. List of SNPs included in cervical cancer PRS**

| <b>Accession</b>       | <b>Chr name</b> | <b>Chr position</b> | <b>Effect allele</b> | <b>Other allele</b> | <b>Effect weight</b> | <b>Include</b> |
|------------------------|-----------------|---------------------|----------------------|---------------------|----------------------|----------------|
| PGS000784_hmPOS_GRCh37 | 6               | 33063219            | C                    | T                   | 6.7                  | YES            |
| PGS000784_hmPOS_GRCh37 | 6               | 31480668            | G                    | A                   | 6.24                 | YES            |
| PGS000784_hmPOS_GRCh37 | 6               | 31331257            | G                    | A                   | 7.08                 | YES            |
| PGS000784_hmPOS_GRCh37 | 6               | 32594328            | C                    | T                   | 7.38                 | YES            |
| PGS000784_hmPOS_GRCh37 | 6               | 31347798            | G                    | A                   | 5.83                 | YES            |
| PGS000784_hmPOS_GRCh37 | 6               | 31540141            | A                    | C                   | 6.04                 | YES            |
| PGS000784_hmPOS_GRCh37 | 6               | 32595972            | G                    | A                   | 8.97                 | YES            |
| PGS000784_hmPOS_GRCh37 | 6               | 31382911            | A                    | G                   | 5.73                 | YES            |
| PGS000784_hmPOS_GRCh37 | 6               | 32311459            | G                    | A                   | 10.25                | YES            |
| PGS000784_hmPOS_GRCh37 | 6               | 32584581            | C                    | T                   | 6.24                 | YES            |

Abbreviations: SNP, Single nucleotide polymorphism; PRS, polygenic risk score.

Total number of variants: 10

Matched, n (%): 10 (100%)

Exclusions due to ambiguously matched, n (%): 0 (0%)

Exclusions due to unmatched, n (%): 0 (0%)

**eTable S16. List of SNPs included in pancreatic cancer PRS**

| Accession              | Chr name | Chr position | Effect allele | Other allele | Effect weight | Include |
|------------------------|----------|--------------|---------------|--------------|---------------|---------|
| PGS000794_hmPOS_GRCh37 | 1        | 894573       | G             | A            | 7.46          | YES     |
| PGS000794_hmPOS_GRCh37 | 1        | 199985368    | A             | T            | 7.88          | NO      |
| PGS000794_hmPOS_GRCh37 | 1        | 200007432    | A             | G            | 8.06          | YES     |
| PGS000794_hmPOS_GRCh37 | 2        | 67639769     | G             | T            | 5.91          | YES     |
| PGS000794_hmPOS_GRCh37 | 3        | 189508471    | G             | A            | 5.58          | YES     |
| PGS000794_hmPOS_GRCh37 | 5        | 1294086      | C             | T            | 7.79          | YES     |
| PGS000794_hmPOS_GRCh37 | 5        | 1295373      | C             | T            | 5.64          | YES     |
| PGS000794_hmPOS_GRCh37 | 5        | 1322087      | T             | C            | 8.31          | YES     |
| PGS000794_hmPOS_GRCh37 | 7        | 40866663     | C             | A            | 5.71          | YES     |
| PGS000794_hmPOS_GRCh37 | 7        | 47488569     | A             | T            | 5.48          | NO      |
| PGS000794_hmPOS_GRCh37 | 7        | 130680521    | T             | C            | 7.48          | YES     |
| PGS000794_hmPOS_GRCh37 | 8        | 76470404     | A             | G            | 6.18          | YES     |
| PGS000794_hmPOS_GRCh37 | 8        | 128719884    | T             | A            | 6.08          | NO      |
| PGS000794_hmPOS_GRCh37 | 9        | 106797388    | C             | T            | 5.54          | YES     |
| PGS000794_hmPOS_GRCh37 | 9        | 136149229    | C             | T            | 10.73         | YES     |
| PGS000794_hmPOS_GRCh37 | 13       | 28493997     | A             | G            | 7.53          | YES     |
| PGS000794_hmPOS_GRCh37 | 13       | 73916628     | C             | T            | 9.79          | YES     |
| PGS000794_hmPOS_GRCh37 | 16       | 75263661     | A             | G            | 6.77          | YES     |
| PGS000794_hmPOS_GRCh37 | 17       | 36078510     | G             | A            | 5.68          | YES     |
| PGS000794_hmPOS_GRCh37 | 17       | 70401476     | T             | C            | 7.75          | YES     |
| PGS000794_hmPOS_GRCh37 | 18       | 56878274     | C             | T            | 5.53          | YES     |
| PGS000794_hmPOS_GRCh37 | 22       | 29300306     | T             | C            | 5.7           | YES     |

Abbreviations: SNP, Single nucleotide polymorphism; PRS, polygenic risk score.

Total number of variants: 22

Matched, n (%): 19 (86.36%)

Exclusions due to ambiguously matched, n (%): 3 (13.64%)

Exclusions due to unmatched, n (%): 0 (0%)

**eTable S17. List of SNPs included in stomach cancer PRS**

| <b>Accession</b>       | <b>Chr name</b> | <b>Chr position</b> | <b>Effect allele</b> | <b>Other allele</b> | <b>Effect weight</b> | <b>Include</b> |
|------------------------|-----------------|---------------------|----------------------|---------------------|----------------------|----------------|
| PGS002299_hmPOS_GRCh37 | 1               | 155184975           | G                    | A                   | 0.235722334          | YES            |
| PGS002299_hmPOS_GRCh37 | 5               | 40685795            | T                    | C                   | 0.210721031          | YES            |
| PGS002299_hmPOS_GRCh37 | 8               | 143761931           | T                    | C                   | 0.19062036           | YES            |

Abbreviations: SNP, Single nucleotide polymorphism; PRS, polygenic risk score.

Total number of variants: 3

Matched, n (%): 3 (100%)

Exclusions due to ambiguously matched, n (%): 0 (0%)

Exclusions due to unmatched, n (%): 0 (0%)

**eTable S18. List of SNPs included in lymphoid leukemia PRS**

| Accession              | Chr name | Chr position | Effect allele | Other allele | Effect weight | Include |
|------------------------|----------|--------------|---------------|--------------|---------------|---------|
| PGS000788_hmPOS_GRCh37 | 1        | 23943735     | C             | A            | 9.88          | YES     |
| PGS000788_hmPOS_GRCh37 | 1        | 228880296    | G             | A            | 6.46          | YES     |
| PGS000788_hmPOS_GRCh37 | 2        | 37596089     | T             | C            | 5.64          | YES     |
| PGS000788_hmPOS_GRCh37 | 2        | 111600519    | C             | T            | 9.93          | YES     |
| PGS000788_hmPOS_GRCh37 | 2        | 111616619    | C             | T            | 9.96          | YES     |
| PGS000788_hmPOS_GRCh37 | 2        | 111797458    | G             | A            | 10.95         | YES     |
| PGS000788_hmPOS_GRCh37 | 2        | 111927379    | G             | A            | 10.39         | YES     |
| PGS000788_hmPOS_GRCh37 | 2        | 146124454    | A             | C            | 5.53          | YES     |
| PGS000788_hmPOS_GRCh37 | 2        | 202023949    | A             | G            | 6.57          | YES     |
| PGS000788_hmPOS_GRCh37 | 2        | 231091223    | G             | T            | 12.22         | YES     |
| PGS000788_hmPOS_GRCh37 | 2        | 242294913    | G             | A            | 6.81          | YES     |
| PGS000788_hmPOS_GRCh37 | 3        | 27777779     | T             | C            | 6.67          | YES     |
| PGS000788_hmPOS_GRCh37 | 3        | 169492101    | C             | T            | 6.8           | YES     |
| PGS000788_hmPOS_GRCh37 | 3        | 188115682    | C             | A            | 5.59          | YES     |
| PGS000788_hmPOS_GRCh37 | 3        | 189401776    | G             | C            | 5.75          | NO      |
| PGS000788_hmPOS_GRCh37 | 4        | 102741002    | C             | T            | 6.42          | YES     |
| PGS000788_hmPOS_GRCh37 | 4        | 109016824    | A             | C            | 6.24          | YES     |
| PGS000788_hmPOS_GRCh37 | 4        | 114683844    | C             | G            | 5.93          | NO      |
| PGS000788_hmPOS_GRCh37 | 4        | 185254772    | T             | C            | 5.51          | YES     |
| PGS000788_hmPOS_GRCh37 | 5        | 1279790      | T             | C            | 6.45          | YES     |
| PGS000788_hmPOS_GRCh37 | 5        | 1285974      | A             | C            | 6.19          | YES     |
| PGS000788_hmPOS_GRCh37 | 6        | 411064       | G             | A            | 12.56         | YES     |
| PGS000788_hmPOS_GRCh37 | 6        | 442357       | G             | A            | 5.82          | YES     |
| PGS000788_hmPOS_GRCh37 | 6        | 2969278      | T             | C            | 5.7           | YES     |
| PGS000788_hmPOS_GRCh37 | 6        | 32257566     | A             | G            | 5.49          | YES     |
| PGS000788_hmPOS_GRCh37 | 6        | 32578127     | G             | A            | 9.21          | YES     |
| PGS000788_hmPOS_GRCh37 | 6        | 32611641     | G             | A            | 5.84          | YES     |
| PGS000788_hmPOS_GRCh37 | 6        | 32626272     | A             | C            | 6.34          | YES     |
| PGS000788_hmPOS_GRCh37 | 6        | 33546930     | C             | T            | 8.37          | YES     |
| PGS000788_hmPOS_GRCh37 | 6        | 34616322     | C             | G            | 5.61          | NO      |
| PGS000788_hmPOS_GRCh37 | 6        | 154478440    | C             | A            | 6.41          | YES     |
| PGS000788_hmPOS_GRCh37 | 7        | 50418949     | T             | C            | 5.63          | YES     |
| PGS000788_hmPOS_GRCh37 | 7        | 50477144     | A             | G            | 15.83         | YES     |
| PGS000788_hmPOS_GRCh37 | 7        | 50546925     | C             | T            | 6.66          | YES     |
| PGS000788_hmPOS_GRCh37 | 7        | 50567493     | A             | G            | 5.47          | YES     |
| PGS000788_hmPOS_GRCh37 | 7        | 50576903     | A             | G            | 6.56          | YES     |
| PGS000788_hmPOS_GRCh37 | 7        | 124462661    | C             | T            | 5.81          | YES     |
| PGS000788_hmPOS_GRCh37 | 8        | 103578874    | G             | T            | 5.94          | YES     |
| PGS000788_hmPOS_GRCh37 | 8        | 128192981    | G             | A            | 7.81          | YES     |
| PGS000788_hmPOS_GRCh37 | 8        | 130194104    | A             | C            | 5.89          | YES     |
| PGS000788_hmPOS_GRCh37 | 9        | 21970916     | A             | G            | 10.91         | YES     |
| PGS000788_hmPOS_GRCh37 | 9        | 21984661     | G             | T            | 6.65          | YES     |
| PGS000788_hmPOS_GRCh37 | 9        | 22044122     | C             | T            | 8.04          | YES     |
| PGS000788_hmPOS_GRCh37 | 9        | 22060833     | A             | G            | 5.47          | YES     |
| PGS000788_hmPOS_GRCh37 | 9        | 22206987     | C             | T            | 6.24          | YES     |

|                        |    |           |   |   |       |     |
|------------------------|----|-----------|---|---|-------|-----|
| PGS000788_hmPOS_GRCh37 | 10 | 8104208   | A | C | 7.64  | YES |
| PGS000788_hmPOS_GRCh37 | 10 | 22341574  | G | C | 5.48  | NO  |
| PGS000788_hmPOS_GRCh37 | 10 | 22856279  | C | T | 6.88  | YES |
| PGS000788_hmPOS_GRCh37 | 10 | 63752159  | G | T | 13.87 | YES |
| PGS000788_hmPOS_GRCh37 | 10 | 63773039  | A | G | 6.75  | YES |
| PGS000788_hmPOS_GRCh37 | 10 | 90759724  | G | A | 8.96  | YES |
| PGS000788_hmPOS_GRCh37 | 10 | 126292655 | C | T | 6.87  | YES |
| PGS000788_hmPOS_GRCh37 | 11 | 2321650   | A | G | 6.56  | YES |
| PGS000788_hmPOS_GRCh37 | 11 | 113517203 | T | C | 6.68  | YES |
| PGS000788_hmPOS_GRCh37 | 11 | 123361397 | A | G | 16.62 | YES |
| PGS000788_hmPOS_GRCh37 | 11 | 123368333 | G | A | 8.1   | YES |
| PGS000788_hmPOS_GRCh37 | 12 | 96612762  | T | A | 5.76  | NO  |
| PGS000788_hmPOS_GRCh37 | 12 | 113380008 | G | A | 5.58  | YES |
| PGS000788_hmPOS_GRCh37 | 12 | 117002658 | A | G | 5.69  | YES |
| PGS000788_hmPOS_GRCh37 | 14 | 23589349  | A | G | 9.48  | YES |
| PGS000788_hmPOS_GRCh37 | 14 | 92697912  | T | A | 5.82  | NO  |
| PGS000788_hmPOS_GRCh37 | 15 | 40397936  | T | G | 6.17  | YES |
| PGS000788_hmPOS_GRCh37 | 15 | 56340896  | A | G | 6.43  | YES |
| PGS000788_hmPOS_GRCh37 | 15 | 56777691  | G | A | 8.73  | YES |
| PGS000788_hmPOS_GRCh37 | 15 | 70018990  | A | G | 12.07 | YES |
| PGS000788_hmPOS_GRCh37 | 16 | 85928621  | A | T | 11.1  | NO  |
| PGS000788_hmPOS_GRCh37 | 16 | 85975659  | T | C | 6     | YES |
| PGS000788_hmPOS_GRCh37 | 18 | 47843534  | A | G | 5.53  | YES |
| PGS000788_hmPOS_GRCh37 | 18 | 57628926  | A | G | 5.83  | YES |
| PGS000788_hmPOS_GRCh37 | 18 | 60793549  | G | A | 6.99  | YES |
| PGS000788_hmPOS_GRCh37 | 18 | 60793921  | C | T | 7.18  | YES |
| PGS000788_hmPOS_GRCh37 | 19 | 4069119   | A | G | 5.46  | YES |
| PGS000788_hmPOS_GRCh37 | 19 | 47176752  | C | A | 5.52  | YES |
| PGS000788_hmPOS_GRCh37 | 19 | 47207654  | A | G | 5.89  | YES |
| PGS000788_hmPOS_GRCh37 | 22 | 50971266  | T | C | 5.95  | YES |

Abbreviations: SNP, Single nucleotide polymorphism; PRS, polygenic risk score.

Total number of variants: 75

Matched, n (%): 68 (90.67%)

Exclusions due to ambiguously matched, n (%): 7 (9.33%)

Exclusions due to unmatched, n (%): 0 (0%)

**eTable S19. List of SNPs included in bladder cancer PRS**

| Accession              | Chr name | Chr position | Effect allele | Other allele | Effect weight | Include |
|------------------------|----------|--------------|---------------|--------------|---------------|---------|
| PGS000782_hmPOS_GRCh37 | 2        | 234565283    | A             | C            | 6.25          | YES     |
| PGS000782_hmPOS_GRCh37 | 3        | 169492101    | C             | T            | 5.86          | YES     |
| PGS000782_hmPOS_GRCh37 | 3        | 189645933    | A             | G            | 6.71          | YES     |
| PGS000782_hmPOS_GRCh37 | 4        | 1734239      | T             | C            | 10.3          | YES     |
| PGS000782_hmPOS_GRCh37 | 5        | 1322087      | C             | T            | 6.59          | YES     |
| PGS000782_hmPOS_GRCh37 | 8        | 18272881     | A             | G            | 6.6           | YES     |
| PGS000782_hmPOS_GRCh37 | 8        | 128718068    | T             | G            | 12.92         | YES     |
| PGS000782_hmPOS_GRCh37 | 8        | 143761931    | T             | C            | 7.9           | YES     |
| PGS000782_hmPOS_GRCh37 | 11       | 1874072      | A             | G            | 5.49          | YES     |
| PGS000782_hmPOS_GRCh37 | 13       | 113659108    | A             | G            | 6.28          | YES     |
| PGS000782_hmPOS_GRCh37 | 18       | 43309911     | T             | C            | 6.51          | YES     |
| PGS000782_hmPOS_GRCh37 | 19       | 30296853     | C             | T            | 6.78          | YES     |
| PGS000782_hmPOS_GRCh37 | 20       | 10961935     | A             | C            | 6.75          | YES     |
| PGS000782_hmPOS_GRCh37 | 20       | 10988099     | A             | G            | 6.69          | YES     |
| PGS000782_hmPOS_GRCh37 | 22       | 39332623     | T             | C            | 6.83          | YES     |

Abbreviations: SNP, Single nucleotide polymorphism; PRS, polygenic risk score.

Total number of variants: 15

Matched, n (%): 15 (100%)

Exclusions due to ambiguously matched, n (%): 0 (0%)

Exclusions due to unmatched, n (%): 0 (0%)

**eTable S20. List of SNPs included in Hodgkin's lymphoma PRS**

| Accession              | Chr name | Chr position | Effect allele | Other allele | Effect weight | Include |
|------------------------|----------|--------------|---------------|--------------|---------------|---------|
| PGS000639_hmPOS_GRCh37 | 1        | 114377568    | A             | G            | 0.19062036    | YES     |
| PGS000639_hmPOS_GRCh37 | 2        | 61066666     | G             | A            | 0.21511138    | YES     |
| PGS000639_hmPOS_GRCh37 | 3        | 27764623     | G             | A            | 0.231111721   | YES     |
| PGS000639_hmPOS_GRCh37 | 3        | 187954414    | A             | C            | 0.262364264   | YES     |
| PGS000639_hmPOS_GRCh37 | 5        | 131998413    | A             | G            | 0.463734016   | YES     |
| PGS000639_hmPOS_GRCh37 | 6        | 32428285     | C             | T            | 0.494696242   | YES     |
| PGS000639_hmPOS_GRCh37 | 6        | 33684313     | A             | G            | 0.254642218   | YES     |
| PGS000639_hmPOS_GRCh37 | 6        | 128288536    | C             | T            | 0.182321557   | YES     |
| PGS000639_hmPOS_GRCh37 | 6        | 135415004    | C             | T            | 0.19062036    | YES     |
| PGS000639_hmPOS_GRCh37 | 6        | 135626348    | G             | T            | 0.207014169   | YES     |
| PGS000639_hmPOS_GRCh37 | 6        | 137981584    | T             | C            | 0.173953307   | YES     |
| PGS000639_hmPOS_GRCh37 | 8        | 129075832    | C             | T            | 0.182321557   | YES     |
| PGS000639_hmPOS_GRCh37 | 8        | 129192271    | C             | T            | 0.262364264   | YES     |
| PGS000639_hmPOS_GRCh37 | 10       | 8093034      | G             | T            | 0.329303747   | YES     |
| PGS000639_hmPOS_GRCh37 | 10       | 8101927      | T             | C            | 0.329303747   | YES     |
| PGS000639_hmPOS_GRCh37 | 11       | 111249611    | A             | G            | 0.173953307   | YES     |
| PGS000639_hmPOS_GRCh37 | 13       | 115059729    | C             | T            | 0.329303747   | YES     |
| PGS000639_hmPOS_GRCh37 | 16       | 11198938     | A             | G            | 0.21511138    | YES     |
| PGS000639_hmPOS_GRCh37 | 16       | 30174926     | T             | C            | 0.148420005   | YES     |
| PGS000639_hmPOS_GRCh37 | 20       | 44702120     | T             | C            | 0.139761942   | YES     |

Abbreviations: SNP, Single nucleotide polymorphism; PRS, polygenic risk score.

Total number of variants: 20

Matched, n (%): 20 (100%)

Exclusions due to ambiguously matched, n (%): 0 (0%)

Exclusions due to unmatched, n (%): 0 (0%)

**eTable S21. List of SNPs included in larynx cancer PRS**

| Accession              | Chr name | Chr position | Effect allele | Other allele | Effect weight | Include |
|------------------------|----------|--------------|---------------|--------------|---------------|---------|
| PGS000362_hmPOS_GRCh37 | 1        | 10859513     | G             | A            | -0.444        | YES     |
| PGS000362_hmPOS_GRCh37 | 1        | 32334427     | G             | A            | 1.85          | YES     |
| PGS000362_hmPOS_GRCh37 | 1        | 67500797     | C             | T            | 2.29          | YES     |
| PGS000362_hmPOS_GRCh37 | 1        | 94529355     | G             | A            | 2.11          | YES     |
| PGS000362_hmPOS_GRCh37 | 1        | 98159558     | A             | G            | 0.39          | YES     |
| PGS000362_hmPOS_GRCh37 | 1        | 157522111    | G             | C            | 2.43          | NO      |
| PGS000362_hmPOS_GRCh37 | 2        | 38463396     | G             | C            | 1.52          | NO      |
| PGS000362_hmPOS_GRCh37 | 2        | 61931907     | C             | T            | 0.506         | YES     |
| PGS000362_hmPOS_GRCh37 | 2        | 142878715    | A             | C            | 1.5           | YES     |
| PGS000362_hmPOS_GRCh37 | 3        | 19238171     | T             | G            | 0.888         | YES     |
| PGS000362_hmPOS_GRCh37 | 3        | 195277690    | T             | C            | 1.18          | YES     |
| PGS000362_hmPOS_GRCh37 | 4        | 8092688      | T             | C            | 1.5           | YES     |
| PGS000362_hmPOS_GRCh37 | 4        | 117595443    | T             | A            | 1.24          | NO      |
| PGS000362_hmPOS_GRCh37 | 4        | 146510243    | G             | T            | 1.57          | YES     |
| PGS000362_hmPOS_GRCh37 | 5        | 14483164     | A             | G            | 0.435         | YES     |
| PGS000362_hmPOS_GRCh37 | 5        | 31507079     | A             | G            | 1.47          | YES     |
| PGS000362_hmPOS_GRCh37 | 6        | 23104359     | T             | C            | 1.12          | YES     |
| PGS000362_hmPOS_GRCh37 | 6        | 44498186     | C             | T            | 0.398         | YES     |
| PGS000362_hmPOS_GRCh37 | 6        | 52133731     | G             | A            | 1.56          | YES     |
| PGS000362_hmPOS_GRCh37 | 6        | 74145883     | T             | C            | 1.49          | YES     |
| PGS000362_hmPOS_GRCh37 | 6        | 103690786    | C             | T            | -0.599        | YES     |
| PGS000362_hmPOS_GRCh37 | 6        | 126441138    | G             | A            | 0.752         | YES     |
| PGS000362_hmPOS_GRCh37 | 7        | 47597180     | G             | T            | 0.852         | YES     |
| PGS000362_hmPOS_GRCh37 | 7        | 54131046     | T             | C            | 0.507         | YES     |
| PGS000362_hmPOS_GRCh37 | 7        | 113297775    | C             | G            | 0.579         | NO      |
| PGS000362_hmPOS_GRCh37 | 8        | 14509228     | G             | T            | 0.894         | YES     |
| PGS000362_hmPOS_GRCh37 | 8        | 16925030     | T             | C            | 1.5           | YES     |
| PGS000362_hmPOS_GRCh37 | 8        | 30395392     | A             | G            | 1.07          | YES     |
| PGS000362_hmPOS_GRCh37 | 9        | 122465539    | C             | A            | 1.11          | YES     |
| PGS000362_hmPOS_GRCh37 | 10       | 17347299     | A             | T            | 0.403         | NO      |
| PGS000362_hmPOS_GRCh37 | 10       | 29819017     | T             | C            | 1.9           | YES     |
| PGS000362_hmPOS_GRCh37 | 10       | 116317908    | G             | A            | -1.06         | YES     |
| PGS000362_hmPOS_GRCh37 | 10       | 133519852    | C             | G            | 1.21          | NO      |
| PGS000362_hmPOS_GRCh37 | 11       | 4481261      | T             | A            | -0.387        | NO      |
| PGS000362_hmPOS_GRCh37 | 11       | 61942541     | T             | G            | 0.454         | YES     |
| PGS000362_hmPOS_GRCh37 | 11       | 92966435     | A             | G            | 0.421         | YES     |
| PGS000362_hmPOS_GRCh37 | 11       | 106368253    | T             | C            | 1.82          | YES     |
| PGS000362_hmPOS_GRCh37 | 11       | 125823353    | T             | C            | 0.5           | YES     |
| PGS000362_hmPOS_GRCh37 | 12       | 4945348      | T             | C            | 0.978         | YES     |
| PGS000362_hmPOS_GRCh37 | 13       | 24008773     | A             | G            | 0.431         | YES     |
| PGS000362_hmPOS_GRCh37 | 13       | 32933022     | T             | G            | 0.397         | YES     |
| PGS000362_hmPOS_GRCh37 | 14       | 100032934    | T             | C            | 1.58          | YES     |
| PGS000362_hmPOS_GRCh37 | 15       | 94110918     | A             | G            | -0.71         | YES     |
| PGS000362_hmPOS_GRCh37 | 16       | 393948       | T             | C            | 0.411         | YES     |
| PGS000362_hmPOS_GRCh37 | 16       | 12249506     | A             | G            | 0.778         | YES     |



|                        |    |          |   |   |        |     |
|------------------------|----|----------|---|---|--------|-----|
| PGS000362_hmPOS_GRCh37 | 16 | 82771075 | A | G | 0.475  | YES |
| PGS000362_hmPOS_GRCh37 | 17 | 78514637 | G | A | 0.551  | YES |
| PGS000362_hmPOS_GRCh37 | 18 | 65333614 | G | A | -0.535 | YES |
| PGS000362_hmPOS_GRCh37 | 19 | 53404512 | C | T | 2.33   | YES |
| PGS000362_hmPOS_GRCh37 | 20 | 4682314  | T | C | 2.35   | YES |
| PGS000362_hmPOS_GRCh37 | 20 | 18955117 | C | G | 1.81   | NO  |
| PGS000362_hmPOS_GRCh37 | 20 | 58450616 | A | G | 1.64   | YES |
| PGS000362_hmPOS_GRCh37 | 21 | 21853777 | T | C | -0.42  | YES |

Abbreviations: SNP, Single nucleotide polymorphism; PRS, polygenic risk score.

Total number of variants: 53

Matched, n (%): 45 (84.91%)

Exclusions due to ambiguously matched, n (%): 8 (15.09%)

Exclusions due to unmatched, n (%): 0 (0%)

**eTable S22. List of SNPs included in tracheal cancer PRS**

| Accession              | Chr name | Chr position | Effect allele | Other allele | Effect weight | Include |
|------------------------|----------|--------------|---------------|--------------|---------------|---------|
| PGS000392_hmPOS_GRCh37 | 1        | 77967507     | A             | T            | 0.127764345   | NO      |
| PGS000392_hmPOS_GRCh37 | 3        | 189357199    | G             | T            | 0.110739354   | YES     |
| PGS000392_hmPOS_GRCh37 | 5        | 1285974      | A             | C            | 0.222222087   | YES     |
| PGS000392_hmPOS_GRCh37 | 5        | 1320247      | G             | A            | 0.141287474   | YES     |
| PGS000392_hmPOS_GRCh37 | 6        | 26285867     | C             | T            | 0.075844863   | YES     |
| PGS000392_hmPOS_GRCh37 | 6        | 29781049     | T             | G            | 0.095199628   | YES     |
| PGS000392_hmPOS_GRCh37 | 6        | 31434111     | G             | A            | 0.223154591   | YES     |
| PGS000392_hmPOS_GRCh37 | 8        | 27344719     | G             | A            | 0.141137604   | YES     |
| PGS000392_hmPOS_GRCh37 | 8        | 32410110     | G             | A            | 0.124309867   | YES     |
| PGS000392_hmPOS_GRCh37 | 9        | 21830157     | G             | A            | 0.15454663    | YES     |
| PGS000392_hmPOS_GRCh37 | 9        | 22052068     | G             | A            | 0.165877847   | YES     |
| PGS000392_hmPOS_GRCh37 | 10       | 105687632    | C             | A            | 0.150557805   | YES     |
| PGS000392_hmPOS_GRCh37 | 11       | 118125625    | T             | C            | 0.102138631   | YES     |
| PGS000392_hmPOS_GRCh37 | 12       | 998819       | G             | C            | 0.145612966   | NO      |
| PGS000392_hmPOS_GRCh37 | 13       | 32972626     | T             | A            | 0.472187431   | NO      |
| PGS000392_hmPOS_GRCh37 | 15       | 49376624     | T             | G            | 0.155057925   | YES     |
| PGS000392_hmPOS_GRCh37 | 15       | 78857986     | G             | C            | 0.260378679   | NO      |
| PGS000392_hmPOS_GRCh37 | 15       | 79185180     | G             | A            | 0.091838889   | YES     |
| PGS000392_hmPOS_GRCh37 | 19       | 41353107     | C             | T            | 0.122792512   | YES     |

Abbreviations: SNP, Single nucleotide polymorphism; PRS, polygenic risk score.

Total number of variants: 19

Matched, n (%): 15 (78.95%)

Exclusions due to ambiguously matched, n (%): 4 (21.05%)

Exclusions due to unmatched, n (%): 0 (0%)

**eTable S23. List of SNPs included in esophageal cancer PRS**

| Accession              | Chr name | Chr position | Effect allele | Other allele | Effect weight     | Include |
|------------------------|----------|--------------|---------------|--------------|-------------------|---------|
| PGS000364_hmPOS_GRCh37 | 1        | 11410483     | G             | T            | 0.004512395       | YES     |
| PGS000364_hmPOS_GRCh37 | 1        | 11411071     | T             | G            | 0.004049102       | YES     |
| PGS000364_hmPOS_GRCh37 | 1        | 11411432     | A             | G            | 0.004203736       | YES     |
| PGS000364_hmPOS_GRCh37 | 1        | 15718366     | G             | T            | 0.000846096       | YES     |
| PGS000364_hmPOS_GRCh37 | 1        | 20903408     | C             | T            | 0.011614661       | YES     |
| PGS000364_hmPOS_GRCh37 | 1        | 20973655     | G             | T            | 0.001973367       | YES     |
| PGS000364_hmPOS_GRCh37 | 1        | 30504582     | A             | G            | 0.000574702       | YES     |
| PGS000364_hmPOS_GRCh37 | 1        | 31568123     | C             | T            | 0.001405238       | YES     |
| PGS000364_hmPOS_GRCh37 | 1        | 31568962     | C             | T            | 0.002386453       | YES     |
| PGS000364_hmPOS_GRCh37 | 1        | 31569772     | T             | C            | 0.001036376       | YES     |
| PGS000364_hmPOS_GRCh37 | 1        | 31572571     | C             | T            | 0.000261527       | YES     |
| PGS000364_hmPOS_GRCh37 | 1        | 31573531     | C             | G            | 0.000341948       | NO      |
| PGS000364_hmPOS_GRCh37 | 1        | 31573640     | T             | C            | 0.00011493        | YES     |
| PGS000364_hmPOS_GRCh37 | 1        | 31573885     | T             | C            | 0.000129741       | YES     |
| PGS000364_hmPOS_GRCh37 | 1        | 31574031     | T             | C            | 0.000134305       | YES     |
| PGS000364_hmPOS_GRCh37 | 1        | 31574982     | T             | G            | 1.85513E-05       | YES     |
| PGS000364_hmPOS_GRCh37 | 1        | 34249144     | G             | C            | 0.001651071       | NO      |
| PGS000364_hmPOS_GRCh37 | 1        | 34249160     | G             | C            | 0.001608022       | NO      |
| PGS000364_hmPOS_GRCh37 | 1        | 34250018     | C             | T            | 0.005243709       | YES     |
| PGS000364_hmPOS_GRCh37 | 1        | 34251481     | C             | T            | 0.010521591       | YES     |
| PGS000364_hmPOS_GRCh37 | 1        | 34251754     | C             | T            | 0.01035266        | YES     |
| PGS000364_hmPOS_GRCh37 | 1        | 34252019     | G             | A            | 0.009523849       | YES     |
| PGS000364_hmPOS_GRCh37 | 1        | 34253041     | C             | G            | 0.004966635       | NO      |
| PGS000364_hmPOS_GRCh37 | 1        | 34253141     | T             | G            | 0.004337845       | YES     |
| PGS000364_hmPOS_GRCh37 | 1        | 38749491     | G             | C            | -0.003992458      | NO      |
| PGS000364_hmPOS_GRCh37 | 1        | 43464391     | G             | A            | 0.000212649       | YES     |
| PGS000364_hmPOS_GRCh37 | 1        | 43464635     | C             | T            | 0.00019099        | YES     |
| PGS000364_hmPOS_GRCh37 | 1        | 43464697     | G             | T            | 6.16799E-05       | YES     |
| PGS000364_hmPOS_GRCh37 | 1        | 44855878     | A             | G            | 0.000156893       | YES     |
| PGS000364_hmPOS_GRCh37 | 1        | 44855942     | A             | G            | 0.013681187       | YES     |
| PGS000364_hmPOS_GRCh37 | 1        | 58787119     | T             | C            | 0.005382391       | YES     |
| PGS000364_hmPOS_GRCh37 | 1        | 58789343     | A             | G            | 0.005409216       | YES     |
| PGS000364_hmPOS_GRCh37 | 1        | 58793895     | A             | G            | 0.004613325       | YES     |
| PGS000364_hmPOS_GRCh37 | 1        | 71023538     | T             | C            | 0.0030005         | YES     |
| PGS000364_hmPOS_GRCh37 | 1        | 71037431     | T             | C            | 0.004318786       | YES     |
| PGS000364_hmPOS_GRCh37 | 1        | 71175583     | C             | G            | 0.003960897       | NO      |
| PGS000364_hmPOS_GRCh37 | 1        | 71184053     | A             | G            | 0.002569862       | YES     |
| PGS000364_hmPOS_GRCh37 | 1        | 71256068     | C             | T            | 6.40692E-05       | YES     |
| PGS000364_hmPOS_GRCh37 | 1        | 71702864     | C             | T            | 0.002703838       | YES     |
| PGS000364_hmPOS_GRCh37 | 1        | 71909921     | T             | A            | 0.01326197        | NO      |
| PGS000364_hmPOS_GRCh37 | 1        | 71996378     | T             | C            | 0.002458081       | YES     |
| PGS000364_hmPOS_GRCh37 | 1        | 72986136     | T             | G            | 0.000347144       | YES     |
| PGS000364_hmPOS_GRCh37 | 1        | 73006137     | T             | C            | 0.029545529       | YES     |
| PGS000364_hmPOS_GRCh37 | 1        | 73008966     | C             | T            | 0.024821385       | YES     |
| PGS000364_hmPOS_GRCh37 | 1        | 81534528     | T             | C            | 0.003214837       | YES     |
| PGS000364_hmPOS_GRCh37 | 1        | 81577225     | A             | T            | 0.00276969        | NO      |
| PGS000364_hmPOS_GRCh37 | 1        | 81613271     | C             | A            | 0.002112725       | YES     |
| PGS000364_hmPOS_GRCh37 | 1        | 92178335     | G             | C            | -0.001303759      | NO      |
| PGS000364_hmPOS_GRCh37 | 1        | 92180390     | G             | C            | -0.001103526      | NO      |
| PGS000364_hmPOS_GRCh37 | 1        | 95777223     | T             | C            | 7.360127040279e-6 | YES     |
| PGS000364_hmPOS_GRCh37 | 1        | 95780019     | G             | A            | 0.000255565       | YES     |
| PGS000364_hmPOS_GRCh37 | 1        | 102537880    | A             | G            | 0.003260179       | YES     |
| PGS000364_hmPOS_GRCh37 | 1        | 102538360    | G             | T            | 0.004620788       | YES     |
| PGS000364_hmPOS_GRCh37 | 1        | 102561485    | G             | C            | 0.00578853        | NO      |
| PGS000364_hmPOS_GRCh37 | 1        | 102566184    | C             | A            | 0.005825664       | YES     |
| PGS000364_hmPOS_GRCh37 | 1        | 102569709    | G             | A            | 0.005865617       | YES     |
| PGS000364_hmPOS_GRCh37 | 1        | 102590737    | T             | C            | 0.007014334       | YES     |
| PGS000364_hmPOS_GRCh37 | 1        | 102595955    | T             | C            | 0.007266251       | YES     |
| PGS000364_hmPOS_GRCh37 | 1        | 102597251    | C             | T            | 0.00731557        | YES     |
| PGS000364_hmPOS_GRCh37 | 1        | 102597496    | A             | C            | 0.006490954       | YES     |

|                        |   |           |   |   |              |     |
|------------------------|---|-----------|---|---|--------------|-----|
| PGS000364_hmPOS_GRCh37 | 1 | 102598108 | T | A | 0.00742713   | NO  |
| PGS000364_hmPOS_GRCh37 | 1 | 102598469 | G | C | 0.007408903  | NO  |
| PGS000364_hmPOS_GRCh37 | 1 | 102598488 | T | C | 0.011718703  | YES |
| PGS000364_hmPOS_GRCh37 | 1 | 102599506 | G | T | 0.007360117  | YES |
| PGS000364_hmPOS_GRCh37 | 1 | 102599540 | T | G | 0.006465627  | YES |
| PGS000364_hmPOS_GRCh37 | 1 | 102600822 | G | A | 0.007414083  | YES |
| PGS000364_hmPOS_GRCh37 | 1 | 102605045 | A | G | 0.007718607  | YES |
| PGS000364_hmPOS_GRCh37 | 1 | 102605420 | A | G | 0.008571526  | YES |
| PGS000364_hmPOS_GRCh37 | 1 | 102607447 | T | C | 0.008697671  | YES |
| PGS000364_hmPOS_GRCh37 | 1 | 102607563 | T | C | 0.008051858  | YES |
| PGS000364_hmPOS_GRCh37 | 1 | 102607815 | G | T | 0.008554174  | YES |
| PGS000364_hmPOS_GRCh37 | 1 | 102607883 | A | C | 0.008638247  | YES |
| PGS000364_hmPOS_GRCh37 | 1 | 102610378 | T | G | 0.008419604  | YES |
| PGS000364_hmPOS_GRCh37 | 1 | 102610446 | G | A | 0.0077388    | YES |
| PGS000364_hmPOS_GRCh37 | 1 | 102610524 | C | A | 0.00834689   | YES |
| PGS000364_hmPOS_GRCh37 | 1 | 102611292 | G | A | 0.008476011  | YES |
| PGS000364_hmPOS_GRCh37 | 1 | 102612004 | T | A | 0.008485075  | NO  |
| PGS000364_hmPOS_GRCh37 | 1 | 102613797 | A | G | 0.009462913  | YES |
| PGS000364_hmPOS_GRCh37 | 1 | 102621502 | G | A | 0.013622128  | YES |
| PGS000364_hmPOS_GRCh37 | 1 | 102626414 | G | A | 0.013448457  | YES |
| PGS000364_hmPOS_GRCh37 | 1 | 102629663 | C | T | 0.013253639  | YES |
| PGS000364_hmPOS_GRCh37 | 1 | 107488481 | C | T | 0.005512904  | YES |
| PGS000364_hmPOS_GRCh37 | 1 | 107488772 | A | G | 0.007049696  | YES |
| PGS000364_hmPOS_GRCh37 | 1 | 107489766 | C | T | 0.010311184  | YES |
| PGS000364_hmPOS_GRCh37 | 1 | 107668721 | A | T | 0.003098843  | NO  |
| PGS000364_hmPOS_GRCh37 | 1 | 116711962 | T | G | 0.001762362  | YES |
| PGS000364_hmPOS_GRCh37 | 1 | 116712641 | A | G | 0.001350477  | YES |
| PGS000364_hmPOS_GRCh37 | 1 | 116716836 | T | C | 0.002877892  | YES |
| PGS000364_hmPOS_GRCh37 | 1 | 116716977 | A | T | 0.002748799  | NO  |
| PGS000364_hmPOS_GRCh37 | 1 | 116717419 | A | G | 0.003157179  | YES |
| PGS000364_hmPOS_GRCh37 | 1 | 116719908 | A | G | 0.001967906  | YES |
| PGS000364_hmPOS_GRCh37 | 1 | 116720866 | C | A | 0.001750223  | YES |
| PGS000364_hmPOS_GRCh37 | 1 | 116721566 | G | A | 0.001830361  | YES |
| PGS000364_hmPOS_GRCh37 | 1 | 116722687 | A | G | 0.00123975   | YES |
| PGS000364_hmPOS_GRCh37 | 1 | 116753658 | A | G | 0.005674348  | YES |
| PGS000364_hmPOS_GRCh37 | 1 | 116769998 | A | G | 0.007459768  | YES |
| PGS000364_hmPOS_GRCh37 | 1 | 116778750 | C | T | 0.007262814  | YES |
| PGS000364_hmPOS_GRCh37 | 1 | 116780234 | A | G | 0.007636175  | YES |
| PGS000364_hmPOS_GRCh37 | 1 | 116787096 | C | T | 0.006924097  | YES |
| PGS000364_hmPOS_GRCh37 | 1 | 161680868 | C | T | 0.003275618  | YES |
| PGS000364_hmPOS_GRCh37 | 1 | 164573681 | C | A | -0.006400019 | YES |
| PGS000364_hmPOS_GRCh37 | 1 | 164575121 | A | G | -0.0056701   | YES |
| PGS000364_hmPOS_GRCh37 | 1 | 164575854 | T | C | -0.006003085 | YES |
| PGS000364_hmPOS_GRCh37 | 1 | 165690515 | A | T | 0.001987041  | NO  |
| PGS000364_hmPOS_GRCh37 | 1 | 175276630 | C | T | -0.00192677  | YES |
| PGS000364_hmPOS_GRCh37 | 1 | 182476185 | T | C | 0.006522026  | YES |
| PGS000364_hmPOS_GRCh37 | 1 | 188764506 | C | T | 0.010859532  | YES |
| PGS000364_hmPOS_GRCh37 | 1 | 203402315 | T | C | -0.00979253  | YES |
| PGS000364_hmPOS_GRCh37 | 1 | 205281255 | T | G | -0.001887755 | YES |
| PGS000364_hmPOS_GRCh37 | 1 | 212329535 | T | C | 0.000918981  | YES |
| PGS000364_hmPOS_GRCh37 | 1 | 212333314 | T | G | 0.000290392  | YES |
| PGS000364_hmPOS_GRCh37 | 1 | 218055182 | C | T | 0.00948692   | YES |
| PGS000364_hmPOS_GRCh37 | 1 | 238131997 | C | T | 0.005264892  | YES |
| PGS000364_hmPOS_GRCh37 | 1 | 238344901 | C | A | -0.005052302 | YES |
| PGS000364_hmPOS_GRCh37 | 1 | 238345361 | T | C | -0.005048836 | YES |
| PGS000364_hmPOS_GRCh37 | 1 | 238351005 | G | A | -0.005025405 | YES |
| PGS000364_hmPOS_GRCh37 | 1 | 238351334 | A | G | -0.004796863 | YES |
| PGS000364_hmPOS_GRCh37 | 1 | 238352551 | A | C | -0.004767355 | YES |
| PGS000364_hmPOS_GRCh37 | 1 | 238359520 | A | G | -0.004160043 | YES |
| PGS000364_hmPOS_GRCh37 | 1 | 238361422 | G | C | -0.004911916 | NO  |
| PGS000364_hmPOS_GRCh37 | 1 | 238363110 | A | C | -0.004894841 | YES |
| PGS000364_hmPOS_GRCh37 | 1 | 238363373 | G | A | -0.003707959 | YES |
| PGS000364_hmPOS_GRCh37 | 1 | 238364867 | G | C | -0.000564641 | NO  |

|                        |   |           |   |   |             |     |
|------------------------|---|-----------|---|---|-------------|-----|
| PGS000364_hmPOS_GRCh37 | 1 | 238740359 | A | G | 0.010099318 | YES |
| PGS000364_hmPOS_GRCh37 | 1 | 238742904 | G | A | 0.008039003 | YES |
| PGS000364_hmPOS_GRCh37 | 1 | 241571995 | C | T | 0.021924302 | YES |
| PGS000364_hmPOS_GRCh37 | 1 | 245481598 | T | C | 0.008965311 | YES |
| PGS000364_hmPOS_GRCh37 | 1 | 247184302 | A | G | 0.007554718 | YES |
| PGS000364_hmPOS_GRCh37 | 2 | 4652574   | G | C | 0.003305219 | NO  |
| PGS000364_hmPOS_GRCh37 | 2 | 7693201   | C | T | 0.009943001 | YES |
| PGS000364_hmPOS_GRCh37 | 2 | 7693398   | C | G | 0.010193728 | NO  |
| PGS000364_hmPOS_GRCh37 | 2 | 7693578   | A | G | 0.010123312 | NO  |
| PGS000364_hmPOS_GRCh37 | 2 | 7693796   | G | T | 0.009998622 | YES |
| PGS000364_hmPOS_GRCh37 | 2 | 7694032   | C | G | 0.009820861 | NO  |
| PGS000364_hmPOS_GRCh37 | 2 | 7695163   | A | C | 0.005896068 | YES |
| PGS000364_hmPOS_GRCh37 | 2 | 7695234   | G | T | 0.004350586 | YES |
| PGS000364_hmPOS_GRCh37 | 2 | 7695856   | A | G | 0.004605871 | YES |
| PGS000364_hmPOS_GRCh37 | 2 | 7696479   | C | T | 0.004263361 | YES |
| PGS000364_hmPOS_GRCh37 | 2 | 7697371   | G | A | 0.005293258 | YES |
| PGS000364_hmPOS_GRCh37 | 2 | 7697461   | A | T | 0.004263159 | NO  |
| PGS000364_hmPOS_GRCh37 | 2 | 7698069   | A | T | 0.004213653 | NO  |
| PGS000364_hmPOS_GRCh37 | 2 | 7700390   | G | A | 0.004447495 | YES |
| PGS000364_hmPOS_GRCh37 | 2 | 7700861   | A | G | 0.004447703 | YES |
| PGS000364_hmPOS_GRCh37 | 2 | 7701025   | T | C | 0.004219652 | YES |
| PGS000364_hmPOS_GRCh37 | 2 | 7701498   | C | T | 0.004550183 | YES |
| PGS000364_hmPOS_GRCh37 | 2 | 7701637   | T | A | 0.004656633 | NO  |
| PGS000364_hmPOS_GRCh37 | 2 | 7702036   | T | C | 0.004374062 | YES |
| PGS000364_hmPOS_GRCh37 | 2 | 7702949   | A | T | 0.004821377 | NO  |
| PGS000364_hmPOS_GRCh37 | 2 | 7703442   | G | C | 0.005607125 | NO  |
| PGS000364_hmPOS_GRCh37 | 2 | 7704185   | T | C | 0.006196806 | YES |
| PGS000364_hmPOS_GRCh37 | 2 | 7704998   | G | A | 0.006460348 | YES |
| PGS000364_hmPOS_GRCh37 | 2 | 7705237   | T | C | 0.006195912 | YES |
| PGS000364_hmPOS_GRCh37 | 2 | 7705812   | T | C | 0.006197324 | YES |
| PGS000364_hmPOS_GRCh37 | 2 | 7705841   | A | T | 0.006579045 | NO  |
| PGS000364_hmPOS_GRCh37 | 2 | 7706063   | C | T | 0.006152595 | YES |
| PGS000364_hmPOS_GRCh37 | 2 | 7706296   | G | A | 0.006261134 | YES |
| PGS000364_hmPOS_GRCh37 | 2 | 7706355   | C | A | 0.006465182 | YES |
| PGS000364_hmPOS_GRCh37 | 2 | 7707691   | A | G | 0.00646538  | YES |
| PGS000364_hmPOS_GRCh37 | 2 | 7708677   | G | T | 0.006465528 | YES |
| PGS000364_hmPOS_GRCh37 | 2 | 7708781   | C | T | 0.006207595 | YES |
| PGS000364_hmPOS_GRCh37 | 2 | 7709715   | A | G | 0.006483176 | YES |
| PGS000364_hmPOS_GRCh37 | 2 | 7709746   | T | C | 0.006207783 | YES |
| PGS000364_hmPOS_GRCh37 | 2 | 7710141   | T | C | 0.006473529 | YES |
| PGS000364_hmPOS_GRCh37 | 2 | 7710274   | A | G | 0.006346993 | YES |
| PGS000364_hmPOS_GRCh37 | 2 | 7710698   | A | G | 0.006789025 | YES |
| PGS000364_hmPOS_GRCh37 | 2 | 7710836   | T | C | 0.006347863 | YES |
| PGS000364_hmPOS_GRCh37 | 2 | 7711220   | T | C | 0.006261134 | YES |
| PGS000364_hmPOS_GRCh37 | 2 | 7713284   | C | T | 0.006279539 | YES |
| PGS000364_hmPOS_GRCh37 | 2 | 7714640   | T | C | 0.006317347 | YES |
| PGS000364_hmPOS_GRCh37 | 2 | 7714913   | C | T | 0.005142471 | YES |
| PGS000364_hmPOS_GRCh37 | 2 | 7717019   | A | G | 0.013365382 | YES |
| PGS000364_hmPOS_GRCh37 | 2 | 7717192   | C | A | 0.006271187 | YES |
| PGS000364_hmPOS_GRCh37 | 2 | 7718791   | A | G | 0.006402898 | YES |
| PGS000364_hmPOS_GRCh37 | 2 | 7720688   | G | A | 0.006665413 | YES |
| PGS000364_hmPOS_GRCh37 | 2 | 7721162   | A | G | 0.006509925 | YES |
| PGS000364_hmPOS_GRCh37 | 2 | 7722245   | C | A | 0.006051231 | YES |
| PGS000364_hmPOS_GRCh37 | 2 | 7723328   | G | A | 0.006595334 | YES |
| PGS000364_hmPOS_GRCh37 | 2 | 7723685   | T | C | 0.006858343 | YES |
| PGS000364_hmPOS_GRCh37 | 2 | 7724374   | G | C | 0.006690166 | NO  |
| PGS000364_hmPOS_GRCh37 | 2 | 7724739   | T | C | 0.006995198 | YES |
| PGS000364_hmPOS_GRCh37 | 2 | 7728010   | T | A | 0.002807057 | NO  |
| PGS000364_hmPOS_GRCh37 | 2 | 7729461   | T | G | 0.005937868 | YES |
| PGS000364_hmPOS_GRCh37 | 2 | 7731894   | A | G | 0.006026376 | YES |
| PGS000364_hmPOS_GRCh37 | 2 | 7732198   | C | T | 0.003071328 | YES |
| PGS000364_hmPOS_GRCh37 | 2 | 7732257   | A | G | 0.005785858 | YES |
| PGS000364_hmPOS_GRCh37 | 2 | 7732403   | A | G | 0.003128202 | YES |

|                        |   |         |   |   |             |     |
|------------------------|---|---------|---|---|-------------|-----|
| PGS000364_hmPOS_GRCh37 | 2 | 7732825 | T | A | 0.003049534 | NO  |
| PGS000364_hmPOS_GRCh37 | 2 | 7733033 | A | G | 0.003059368 | YES |
| PGS000364_hmPOS_GRCh37 | 2 | 7733287 | G | A | 0.003127316 | YES |
| PGS000364_hmPOS_GRCh37 | 2 | 7734831 | C | T | 0.003154817 | YES |
| PGS000364_hmPOS_GRCh37 | 2 | 7735110 | T | A | 0.00314793  | NO  |
| PGS000364_hmPOS_GRCh37 | 2 | 7737783 | C | T | 0.003581448 | YES |
| PGS000364_hmPOS_GRCh37 | 2 | 7738378 | T | C | 0.003657849 | YES |
| PGS000364_hmPOS_GRCh37 | 2 | 7738514 | G | A | 0.003679537 | YES |
| PGS000364_hmPOS_GRCh37 | 2 | 7739207 | G | T | 0.003816296 | YES |
| PGS000364_hmPOS_GRCh37 | 2 | 7739957 | C | T | 0.00576209  | YES |
| PGS000364_hmPOS_GRCh37 | 2 | 7741423 | T | C | 0.002755521 | YES |
| PGS000364_hmPOS_GRCh37 | 2 | 7741817 | G | A | 0.002719923 | YES |
| PGS000364_hmPOS_GRCh37 | 2 | 7742585 | G | T | 0.002675154 | YES |
| PGS000364_hmPOS_GRCh37 | 2 | 7742949 | G | A | 0.002493228 | YES |
| PGS000364_hmPOS_GRCh37 | 2 | 7743134 | A | G | 0.002686616 | YES |
| PGS000364_hmPOS_GRCh37 | 2 | 7744151 | A | C | 0.00272173  | YES |
| PGS000364_hmPOS_GRCh37 | 2 | 7745033 | C | T | 0.002760353 | YES |
| PGS000364_hmPOS_GRCh37 | 2 | 7745192 | C | G | 0.002760119 | NO  |
| PGS000364_hmPOS_GRCh37 | 2 | 7746242 | T | C | 0.002779355 | YES |
| PGS000364_hmPOS_GRCh37 | 2 | 7746617 | A | G | 0.002779329 | YES |
| PGS000364_hmPOS_GRCh37 | 2 | 7746969 | T | C | 0.002779016 | YES |
| PGS000364_hmPOS_GRCh37 | 2 | 7747191 | A | G | 0.002778703 | YES |
| PGS000364_hmPOS_GRCh37 | 2 | 7747471 | C | T | 0.002778651 | YES |
| PGS000364_hmPOS_GRCh37 | 2 | 7748030 | G | A | 0.002005894 | YES |
| PGS000364_hmPOS_GRCh37 | 2 | 7748374 | A | G | 0.002022602 | YES |
| PGS000364_hmPOS_GRCh37 | 2 | 7748757 | T | C | 0.001709006 | YES |
| PGS000364_hmPOS_GRCh37 | 2 | 7749131 | C | T | 0.001890583 | YES |
| PGS000364_hmPOS_GRCh37 | 2 | 7749562 | T | C | 0.001891122 | YES |
| PGS000364_hmPOS_GRCh37 | 2 | 7749808 | A | T | 0.001809617 | NO  |
| PGS000364_hmPOS_GRCh37 | 2 | 7750549 | G | A | 0.002068546 | YES |
| PGS000364_hmPOS_GRCh37 | 2 | 7750601 | A | G | 0.002068546 | YES |
| PGS000364_hmPOS_GRCh37 | 2 | 7750776 | T | C | 0.002068546 | YES |
| PGS000364_hmPOS_GRCh37 | 2 | 7751128 | T | C | 0.001406004 | YES |
| PGS000364_hmPOS_GRCh37 | 2 | 7751300 | A | G | 0.002073081 | YES |
| PGS000364_hmPOS_GRCh37 | 2 | 7751342 | G | A | 0.002072479 | YES |
| PGS000364_hmPOS_GRCh37 | 2 | 7751706 | A | T | 0.000719831 | NO  |
| PGS000364_hmPOS_GRCh37 | 2 | 7751782 | A | G | 0.001645638 | YES |
| PGS000364_hmPOS_GRCh37 | 2 | 7751874 | A | T | 0.001640425 | NO  |
| PGS000364_hmPOS_GRCh37 | 2 | 7751923 | C | T | 0.001640425 | YES |
| PGS000364_hmPOS_GRCh37 | 2 | 7752234 | G | C | 0.001640985 | NO  |
| PGS000364_hmPOS_GRCh37 | 2 | 7752255 | A | G | 0.001640985 | YES |
| PGS000364_hmPOS_GRCh37 | 2 | 7752313 | C | T | 0.001640985 | YES |
| PGS000364_hmPOS_GRCh37 | 2 | 7752411 | G | A | 0.001640985 | YES |
| PGS000364_hmPOS_GRCh37 | 2 | 7752472 | A | G | 0.001608365 | YES |
| PGS000364_hmPOS_GRCh37 | 2 | 7752587 | C | T | 0.001608237 | YES |
| PGS000364_hmPOS_GRCh37 | 2 | 7753327 | G | T | 0.001607616 | YES |
| PGS000364_hmPOS_GRCh37 | 2 | 7753354 | T | C | 0.001556208 | YES |
| PGS000364_hmPOS_GRCh37 | 2 | 7753456 | G | T | 0.0016304   | YES |
| PGS000364_hmPOS_GRCh37 | 2 | 7753616 | C | T | 0.001625437 | YES |
| PGS000364_hmPOS_GRCh37 | 2 | 7753854 | C | G | 0.001588011 | NO  |
| PGS000364_hmPOS_GRCh37 | 2 | 7753880 | G | A | 0.00159461  | YES |
| PGS000364_hmPOS_GRCh37 | 2 | 7753964 | G | A | 0.001588865 | YES |
| PGS000364_hmPOS_GRCh37 | 2 | 7754174 | C | T | 0.001572599 | YES |
| PGS000364_hmPOS_GRCh37 | 2 | 7754215 | C | T | 0.001547658 | YES |
| PGS000364_hmPOS_GRCh37 | 2 | 7754417 | C | T | 0.001562602 | YES |
| PGS000364_hmPOS_GRCh37 | 2 | 7754458 | A | G | 0.001562602 | YES |
| PGS000364_hmPOS_GRCh37 | 2 | 7754657 | G | T | 0.001817462 | YES |
| PGS000364_hmPOS_GRCh37 | 2 | 7754699 | G | A | 0.001562432 | YES |
| PGS000364_hmPOS_GRCh37 | 2 | 7754842 | G | C | 0.001600553 | NO  |
| PGS000364_hmPOS_GRCh37 | 2 | 7755076 | A | G | 0.001600981 | YES |
| PGS000364_hmPOS_GRCh37 | 2 | 7755388 | T | C | 0.00162939  | YES |
| PGS000364_hmPOS_GRCh37 | 2 | 7755632 | G | A | 0.001589143 | YES |
| PGS000364_hmPOS_GRCh37 | 2 | 7755670 | A | G | 0.001589143 | YES |

|                        |   |          |   |   |              |     |
|------------------------|---|----------|---|---|--------------|-----|
| PGS000364_hmPOS_GRCh37 | 2 | 7755837  | T | C | 0.001714845  | YES |
| PGS000364_hmPOS_GRCh37 | 2 | 7756035  | T | C | 0.001698452  | YES |
| PGS000364_hmPOS_GRCh37 | 2 | 7756042  | G | A | 0.001713908  | YES |
| PGS000364_hmPOS_GRCh37 | 2 | 7757047  | C | T | 0.00194779   | YES |
| PGS000364_hmPOS_GRCh37 | 2 | 7758261  | C | G | 0.002397785  | NO  |
| PGS000364_hmPOS_GRCh37 | 2 | 7758980  | G | C | 0.002494569  | NO  |
| PGS000364_hmPOS_GRCh37 | 2 | 7759149  | G | A | 0.002464678  | YES |
| PGS000364_hmPOS_GRCh37 | 2 | 7759930  | T | C | 0.002404879  | YES |
| PGS000364_hmPOS_GRCh37 | 2 | 7762018  | C | T | 0.002108113  | YES |
| PGS000364_hmPOS_GRCh37 | 2 | 7762704  | A | G | 0.002368377  | YES |
| PGS000364_hmPOS_GRCh37 | 2 | 7763768  | A | C | 0.002428594  | YES |
| PGS000364_hmPOS_GRCh37 | 2 | 7767116  | A | G | 0.002755443  | YES |
| PGS000364_hmPOS_GRCh37 | 2 | 7771210  | A | G | 0.001040915  | YES |
| PGS000364_hmPOS_GRCh37 | 2 | 7775304  | C | A | 0.002019436  | YES |
| PGS000364_hmPOS_GRCh37 | 2 | 7783425  | T | C | 0.001831384  | YES |
| PGS000364_hmPOS_GRCh37 | 2 | 7797021  | T | C | 0.012672146  | YES |
| PGS000364_hmPOS_GRCh37 | 2 | 7800453  | T | C | 0.01286635   | YES |
| PGS000364_hmPOS_GRCh37 | 2 | 15310579 | A | G | 0.001227214  | YES |
| PGS000364_hmPOS_GRCh37 | 2 | 15310606 | A | G | 0.001282563  | YES |
| PGS000364_hmPOS_GRCh37 | 2 | 15310820 | T | C | 0.001433149  | YES |
| PGS000364_hmPOS_GRCh37 | 2 | 15311885 | A | G | 0.006699624  | YES |
| PGS000364_hmPOS_GRCh37 | 2 | 15313341 | T | C | 0.005117098  | YES |
| PGS000364_hmPOS_GRCh37 | 2 | 15313634 | T | C | 0.005103948  | YES |
| PGS000364_hmPOS_GRCh37 | 2 | 15314180 | T | C | 0.005097617  | YES |
| PGS000364_hmPOS_GRCh37 | 2 | 15323165 | C | A | 0.005397383  | YES |
| PGS000364_hmPOS_GRCh37 | 2 | 15332877 | C | T | 0.005709275  | YES |
| PGS000364_hmPOS_GRCh37 | 2 | 15345668 | T | C | 0.002015583  | YES |
| PGS000364_hmPOS_GRCh37 | 2 | 15346445 | A | G | 0.002435847  | YES |
| PGS000364_hmPOS_GRCh37 | 2 | 15347328 | C | T | 0.00528058   | YES |
| PGS000364_hmPOS_GRCh37 | 2 | 18281737 | A | G | 0.014833307  | YES |
| PGS000364_hmPOS_GRCh37 | 2 | 21319066 | T | G | 0.00479631   | YES |
| PGS000364_hmPOS_GRCh37 | 2 | 21384070 | C | A | 0.01014993   | YES |
| PGS000364_hmPOS_GRCh37 | 2 | 21391669 | T | C | 0.004659726  | YES |
| PGS000364_hmPOS_GRCh37 | 2 | 40614266 | C | T | 0.002315342  | YES |
| PGS000364_hmPOS_GRCh37 | 2 | 40615007 | A | G | 0.001170397  | YES |
| PGS000364_hmPOS_GRCh37 | 2 | 40615384 | C | T | 0.001023633  | YES |
| PGS000364_hmPOS_GRCh37 | 2 | 40615386 | G | C | 0.001012256  | NO  |
| PGS000364_hmPOS_GRCh37 | 2 | 40615444 | G | C | 0.001100731  | NO  |
| PGS000364_hmPOS_GRCh37 | 2 | 40615896 | T | A | 0.001133692  | NO  |
| PGS000364_hmPOS_GRCh37 | 2 | 40616346 | T | C | 0.001024916  | YES |
| PGS000364_hmPOS_GRCh37 | 2 | 40617126 | G | T | 0.00442258   | YES |
| PGS000364_hmPOS_GRCh37 | 2 | 40618588 | C | T | 0.003338439  | YES |
| PGS000364_hmPOS_GRCh37 | 2 | 40619230 | G | A | 0.004367355  | YES |
| PGS000364_hmPOS_GRCh37 | 2 | 40619660 | G | T | 0.000694379  | YES |
| PGS000364_hmPOS_GRCh37 | 2 | 40621139 | C | A | 0.010509834  | YES |
| PGS000364_hmPOS_GRCh37 | 2 | 40683536 | C | A | 0.008100922  | YES |
| PGS000364_hmPOS_GRCh37 | 2 | 46337172 | A | C | -0.001841039 | YES |
| PGS000364_hmPOS_GRCh37 | 2 | 59096806 | A | G | 0.009115244  | YES |
| PGS000364_hmPOS_GRCh37 | 2 | 59097683 | C | A | 0.001940722  | YES |
| PGS000364_hmPOS_GRCh37 | 2 | 59100050 | A | G | 0.01196856   | YES |
| PGS000364_hmPOS_GRCh37 | 2 | 59708647 | T | G | 0.001727984  | YES |
| PGS000364_hmPOS_GRCh37 | 2 | 59735942 | G | C | 0.017373782  | NO  |
| PGS000364_hmPOS_GRCh37 | 2 | 59774394 | A | G | 0.013144624  | YES |
| PGS000364_hmPOS_GRCh37 | 2 | 60106395 | G | A | 0.010231273  | YES |
| PGS000364_hmPOS_GRCh37 | 2 | 60777498 | C | G | 0.00323238   | NO  |
| PGS000364_hmPOS_GRCh37 | 2 | 64154797 | T | A | 0.000292838  | NO  |
| PGS000364_hmPOS_GRCh37 | 2 | 64197149 | A | C | 0.006732026  | YES |
| PGS000364_hmPOS_GRCh37 | 2 | 64200508 | T | C | 0.00676139   | YES |
| PGS000364_hmPOS_GRCh37 | 2 | 70885377 | A | G | 0.003729068  | YES |
| PGS000364_hmPOS_GRCh37 | 2 | 71827555 | T | C | 0.009899249  | YES |
| PGS000364_hmPOS_GRCh37 | 2 | 76571471 | A | G | 0.00320289   | YES |
| PGS000364_hmPOS_GRCh37 | 2 | 76579521 | C | T | 0.002957806  | YES |
| PGS000364_hmPOS_GRCh37 | 2 | 76584023 | T | A | 0.001306548  | NO  |

|                        |   |           |   |   |              |     |
|------------------------|---|-----------|---|---|--------------|-----|
| PGS000364_hmPOS_GRCh37 | 2 | 76585748  | C | T | 0.001141693  | YES |
| PGS000364_hmPOS_GRCh37 | 2 | 76587733  | C | T | 0.002354091  | YES |
| PGS000364_hmPOS_GRCh37 | 2 | 76602785  | C | A | 0.001856846  | YES |
| PGS000364_hmPOS_GRCh37 | 2 | 76606274  | G | A | 0.00262785   | YES |
| PGS000364_hmPOS_GRCh37 | 2 | 76612231  | A | C | 0.004071843  | YES |
| PGS000364_hmPOS_GRCh37 | 2 | 76613163  | T | A | 0.004731437  | NO  |
| PGS000364_hmPOS_GRCh37 | 2 | 76614533  | G | C | 0.003099228  | NO  |
| PGS000364_hmPOS_GRCh37 | 2 | 76615798  | C | T | 0.003116291  | YES |
| PGS000364_hmPOS_GRCh37 | 2 | 102677765 | A | G | -0.001998963 | YES |
| PGS000364_hmPOS_GRCh37 | 2 | 111447499 | A | G | -0.000239318 | YES |
| PGS000364_hmPOS_GRCh37 | 2 | 120021014 | A | G | 0.016429925  | YES |
| PGS000364_hmPOS_GRCh37 | 2 | 120088893 | A | G | 0.0138631    | YES |
| PGS000364_hmPOS_GRCh37 | 2 | 120096766 | C | T | 0.010070881  | YES |
| PGS000364_hmPOS_GRCh37 | 2 | 120116915 | A | G | -0.005844654 | YES |
| PGS000364_hmPOS_GRCh37 | 2 | 120135008 | C | G | 0.007808283  | NO  |
| PGS000364_hmPOS_GRCh37 | 2 | 120147188 | G | A | 0.014951175  | YES |
| PGS000364_hmPOS_GRCh37 | 2 | 120152982 | G | A | -0.008055765 | YES |
| PGS000364_hmPOS_GRCh37 | 2 | 125280649 | T | C | 0.003801786  | NO  |
| PGS000364_hmPOS_GRCh37 | 2 | 125281910 | T | C | 0.004480917  | YES |
| PGS000364_hmPOS_GRCh37 | 2 | 125284632 | G | A | 0.008969528  | YES |
| PGS000364_hmPOS_GRCh37 | 2 | 127910410 | G | A | 0.002489031  | YES |
| PGS000364_hmPOS_GRCh37 | 2 | 127926992 | A | G | 0.010915671  | YES |
| PGS000364_hmPOS_GRCh37 | 2 | 145295331 | C | T | 0.001837032  | YES |
| PGS000364_hmPOS_GRCh37 | 2 | 150279882 | T | C | -0.003953662 | YES |
| PGS000364_hmPOS_GRCh37 | 2 | 150313726 | G | A | -0.003179962 | YES |
| PGS000364_hmPOS_GRCh37 | 2 | 150407582 | T | C | -0.006137298 | YES |
| PGS000364_hmPOS_GRCh37 | 2 | 150410565 | G | A | -0.005817733 | YES |
| PGS000364_hmPOS_GRCh37 | 2 | 151002345 | C | T | 0.00595805   | YES |
| PGS000364_hmPOS_GRCh37 | 2 | 162361899 | G | A | 0.015540191  | YES |
| PGS000364_hmPOS_GRCh37 | 2 | 162497467 | T | C | 0.015944992  | YES |
| PGS000364_hmPOS_GRCh37 | 2 | 169110394 | T | C | 0.004775314  | YES |
| PGS000364_hmPOS_GRCh37 | 2 | 169117025 | T | G | 0.005330936  | YES |
| PGS000364_hmPOS_GRCh37 | 2 | 169119609 | G | C | 0.005252157  | NO  |
| PGS000364_hmPOS_GRCh37 | 2 | 169120541 | T | A | 0.005332998  | NO  |
| PGS000364_hmPOS_GRCh37 | 2 | 169129145 | T | G | 0.00353374   | YES |
| PGS000364_hmPOS_GRCh37 | 2 | 169133796 | G | A | 0.010267597  | YES |
| PGS000364_hmPOS_GRCh37 | 2 | 169143035 | A | G | 0.002391628  | YES |
| PGS000364_hmPOS_GRCh37 | 2 | 169150494 | A | G | 0.00395637   | YES |
| PGS000364_hmPOS_GRCh37 | 2 | 169150881 | A | G | 0.00396498   | YES |
| PGS000364_hmPOS_GRCh37 | 2 | 169154841 | A | G | 0.010842683  | YES |
| PGS000364_hmPOS_GRCh37 | 2 | 169155595 | G | T | 0.003716913  | YES |
| PGS000364_hmPOS_GRCh37 | 2 | 169166282 | C | T | 0.017150025  | YES |
| PGS000364_hmPOS_GRCh37 | 2 | 173219252 | T | C | -0.021622276 | YES |
| PGS000364_hmPOS_GRCh37 | 2 | 173219523 | A | G | -0.022621957 | YES |
| PGS000364_hmPOS_GRCh37 | 2 | 173219858 | T | C | -0.023303082 | YES |
| PGS000364_hmPOS_GRCh37 | 2 | 173220116 | C | T | -0.021490162 | YES |
| PGS000364_hmPOS_GRCh37 | 2 | 174235452 | G | T | 0.00209114   | YES |
| PGS000364_hmPOS_GRCh37 | 2 | 174241632 | A | C | 0.009710141  | YES |
| PGS000364_hmPOS_GRCh37 | 2 | 174242984 | T | G | 0.001319822  | YES |
| PGS000364_hmPOS_GRCh37 | 2 | 174275519 | G | A | 0.000320605  | YES |
| PGS000364_hmPOS_GRCh37 | 2 | 174275650 | T | G | 0.000142823  | YES |
| PGS000364_hmPOS_GRCh37 | 2 | 174276685 | T | C | 0.000300578  | YES |
| PGS000364_hmPOS_GRCh37 | 2 | 178605665 | G | T | 0.003623767  | YES |
| PGS000364_hmPOS_GRCh37 | 2 | 178613409 | G | A | 0.00381919   | YES |
| PGS000364_hmPOS_GRCh37 | 2 | 178625226 | A | G | 0.005492947  | YES |
| PGS000364_hmPOS_GRCh37 | 2 | 178627440 | T | C | 0.004332607  | YES |
| PGS000364_hmPOS_GRCh37 | 2 | 188637405 | G | A | 0.001628788  | YES |
| PGS000364_hmPOS_GRCh37 | 2 | 193428110 | T | A | -6.7107E-05  | NO  |
| PGS000364_hmPOS_GRCh37 | 2 | 206981677 | T | A | 0.00012208   | NO  |
| PGS000364_hmPOS_GRCh37 | 2 | 207004923 | G | A | 0.004065378  | YES |
| PGS000364_hmPOS_GRCh37 | 2 | 207007930 | T | C | 0.004074671  | YES |
| PGS000364_hmPOS_GRCh37 | 2 | 207011836 | T | C | 0.004036036  | YES |
| PGS000364_hmPOS_GRCh37 | 2 | 207017586 | A | G | 0.004019873  | YES |



|                        |   |           |   |   |              |     |
|------------------------|---|-----------|---|---|--------------|-----|
| PGS000364_hmPOS_GRCh37 | 2 | 207019118 | A | G | 0.00402445   | YES |
| PGS000364_hmPOS_GRCh37 | 2 | 207020304 | A | G | 0.003975969  | YES |
| PGS000364_hmPOS_GRCh37 | 2 | 207027903 | T | C | 0.000949081  | YES |
| PGS000364_hmPOS_GRCh37 | 2 | 217494921 | A | G | 0.006062619  | YES |
| PGS000364_hmPOS_GRCh37 | 2 | 236685678 | C | G | -0.003023879 | NO  |
| PGS000364_hmPOS_GRCh37 | 2 | 240496929 | A | G | 0.002260005  | YES |
| PGS000364_hmPOS_GRCh37 | 2 | 240609925 | C | T | 0.002071808  | YES |
| PGS000364_hmPOS_GRCh37 | 3 | 2608424   | A | G | 0.008811903  | YES |
| PGS000364_hmPOS_GRCh37 | 3 | 3048016   | T | C | -0.000729894 | YES |
| PGS000364_hmPOS_GRCh37 | 3 | 3868538   | G | C | 0.004205898  | NO  |
| PGS000364_hmPOS_GRCh37 | 3 | 3920408   | A | G | 0.021194843  | YES |
| PGS000364_hmPOS_GRCh37 | 3 | 4056290   | A | C | 0.028881788  | YES |
| PGS000364_hmPOS_GRCh37 | 3 | 4058564   | T | C | 0.029099701  | YES |
| PGS000364_hmPOS_GRCh37 | 3 | 4065339   | T | C | 0.02728389   | YES |
| PGS000364_hmPOS_GRCh37 | 3 | 4066089   | C | A | 0.028993441  | YES |
| PGS000364_hmPOS_GRCh37 | 3 | 4066168   | G | T | 0.025150923  | YES |
| PGS000364_hmPOS_GRCh37 | 3 | 4078391   | G | A | 0.020996176  | YES |
| PGS000364_hmPOS_GRCh37 | 3 | 5337049   | T | C | -0.001485292 | YES |
| PGS000364_hmPOS_GRCh37 | 3 | 5337140   | T | C | -0.003569776 | YES |
| PGS000364_hmPOS_GRCh37 | 3 | 5337538   | T | C | -0.001353165 | YES |
| PGS000364_hmPOS_GRCh37 | 3 | 5340118   | T | C | -0.000555711 | YES |
| PGS000364_hmPOS_GRCh37 | 3 | 6732150   | C | T | 0.006212596  | YES |
| PGS000364_hmPOS_GRCh37 | 3 | 6756286   | A | C | 0.013913875  | YES |
| PGS000364_hmPOS_GRCh37 | 3 | 6758905   | G | A | 0.011292461  | YES |
| PGS000364_hmPOS_GRCh37 | 3 | 12468410  | A | G | -0.001678159 | NO  |
| PGS000364_hmPOS_GRCh37 | 3 | 12622623  | C | G | 0.003165191  | NO  |
| PGS000364_hmPOS_GRCh37 | 3 | 21034193  | G | A | 0.004310178  | YES |
| PGS000364_hmPOS_GRCh37 | 3 | 22587535  | G | T | -7.7593E-05  | YES |
| PGS000364_hmPOS_GRCh37 | 3 | 22587564  | G | A | -7.96724E-05 | YES |
| PGS000364_hmPOS_GRCh37 | 3 | 22587653  | G | A | -0.000104914 | YES |
| PGS000364_hmPOS_GRCh37 | 3 | 22587743  | C | T | -9.22303E-05 | YES |
| PGS000364_hmPOS_GRCh37 | 3 | 22587894  | G | A | -8.80804E-05 | YES |
| PGS000364_hmPOS_GRCh37 | 3 | 22588115  | T | A | -6.68081E-05 | NO  |
| PGS000364_hmPOS_GRCh37 | 3 | 25751549  | A | G | 0.001526981  | YES |
| PGS000364_hmPOS_GRCh37 | 3 | 31869036  | G | A | 0.000991923  | YES |
| PGS000364_hmPOS_GRCh37 | 3 | 38374375  | A | G | 0.016845388  | YES |
| PGS000364_hmPOS_GRCh37 | 3 | 38379604  | G | A | 0.019657824  | YES |
| PGS000364_hmPOS_GRCh37 | 3 | 38390273  | C | T | 0.016288684  | YES |
| PGS000364_hmPOS_GRCh37 | 3 | 38422897  | A | G | 0.001591641  | YES |
| PGS000364_hmPOS_GRCh37 | 3 | 38422907  | A | G | 0.001078588  | YES |
| PGS000364_hmPOS_GRCh37 | 3 | 38425746  | A | G | 0.000138806  | YES |
| PGS000364_hmPOS_GRCh37 | 3 | 38425808  | T | C | 7.88738E-05  | YES |
| PGS000364_hmPOS_GRCh37 | 3 | 38441543  | A | C | 0.000825561  | YES |
| PGS000364_hmPOS_GRCh37 | 3 | 38447793  | C | T | 0.003142964  | YES |
| PGS000364_hmPOS_GRCh37 | 3 | 38457783  | C | T | 0.003093011  | YES |
| PGS000364_hmPOS_GRCh37 | 3 | 38464688  | T | C | 0.001068653  | YES |
| PGS000364_hmPOS_GRCh37 | 3 | 38474109  | G | A | 0.002938168  | YES |
| PGS000364_hmPOS_GRCh37 | 3 | 38486696  | G | T | 0.002974868  | YES |
| PGS000364_hmPOS_GRCh37 | 3 | 38492856  | G | A | 0.000566064  | YES |
| PGS000364_hmPOS_GRCh37 | 3 | 38492866  | T | C | 0.000518659  | YES |
| PGS000364_hmPOS_GRCh37 | 3 | 38497081  | C | A | 0.002588565  | YES |
| PGS000364_hmPOS_GRCh37 | 3 | 38500647  | G | C | 0.00112584   | NO  |
| PGS000364_hmPOS_GRCh37 | 3 | 38504388  | G | A | 0.003068042  | YES |
| PGS000364_hmPOS_GRCh37 | 3 | 42742507  | A | G | 0.001942828  | YES |
| PGS000364_hmPOS_GRCh37 | 3 | 42872590  | A | G | 0.000402763  | YES |
| PGS000364_hmPOS_GRCh37 | 3 | 42877394  | T | C | 0.000217769  | YES |
| PGS000364_hmPOS_GRCh37 | 3 | 42877413  | G | A | 0.001885646  | YES |
| PGS000364_hmPOS_GRCh37 | 3 | 42877711  | G | A | 0.000363367  | YES |
| PGS000364_hmPOS_GRCh37 | 3 | 42890731  | C | T | 0.001848703  | YES |
| PGS000364_hmPOS_GRCh37 | 3 | 42896515  | A | T | 9.22637E-05  | NO  |
| PGS000364_hmPOS_GRCh37 | 3 | 42896639  | G | A | 7.95726E-05  | YES |
| PGS000364_hmPOS_GRCh37 | 3 | 42905465  | T | C | 0.001019262  | YES |
| PGS000364_hmPOS_GRCh37 | 3 | 42913610  | C | T | 0.006216231  | YES |

|                        |   |           |   |   |              |     |
|------------------------|---|-----------|---|---|--------------|-----|
| PGS000364_hmPOS_GRCh37 | 3 | 42914876  | T | G | 0.000851364  | YES |
| PGS000364_hmPOS_GRCh37 | 3 | 42917906  | C | T | 0.007449067  | YES |
| PGS000364_hmPOS_GRCh37 | 3 | 42918297  | T | C | 0.007032192  | YES |
| PGS000364_hmPOS_GRCh37 | 3 | 42920235  | T | C | 0.006582823  | YES |
| PGS000364_hmPOS_GRCh37 | 3 | 42921398  | A | G | 0.006827102  | YES |
| PGS000364_hmPOS_GRCh37 | 3 | 42921627  | A | C | 0.006404753  | YES |
| PGS000364_hmPOS_GRCh37 | 3 | 42921649  | C | T | 0.006813121  | YES |
| PGS000364_hmPOS_GRCh37 | 3 | 42922020  | A | G | 0.005970835  | YES |
| PGS000364_hmPOS_GRCh37 | 3 | 42922177  | G | C | 0.00530186   | NO  |
| PGS000364_hmPOS_GRCh37 | 3 | 42922697  | T | G | 0.005498148  | YES |
| PGS000364_hmPOS_GRCh37 | 3 | 42923776  | T | G | 0.006290917  | YES |
| PGS000364_hmPOS_GRCh37 | 3 | 42923964  | C | T | 0.006274383  | YES |
| PGS000364_hmPOS_GRCh37 | 3 | 42924625  | C | A | 0.004698168  | YES |
| PGS000364_hmPOS_GRCh37 | 3 | 42924642  | G | A | 0.005033192  | YES |
| PGS000364_hmPOS_GRCh37 | 3 | 42924683  | G | C | 0.005067689  | NO  |
| PGS000364_hmPOS_GRCh37 | 3 | 45672209  | T | G | 0.001015166  | YES |
| PGS000364_hmPOS_GRCh37 | 3 | 57204419  | G | A | -0.016635689 | YES |
| PGS000364_hmPOS_GRCh37 | 3 | 57270466  | C | T | -5.42028E-05 | YES |
| PGS000364_hmPOS_GRCh37 | 3 | 57314594  | G | A | -0.007944354 | YES |
| PGS000364_hmPOS_GRCh37 | 3 | 70857372  | A | G | 0.004362466  | YES |
| PGS000364_hmPOS_GRCh37 | 3 | 80800297  | C | T | 0.00158336   | YES |
| PGS000364_hmPOS_GRCh37 | 3 | 103845815 | T | G | 0.007229024  | YES |
| PGS000364_hmPOS_GRCh37 | 3 | 103854473 | A | G | 0.004555268  | YES |
| PGS000364_hmPOS_GRCh37 | 3 | 103886834 | T | C | 0.010290032  | YES |
| PGS000364_hmPOS_GRCh37 | 3 | 106010357 | T | G | 0.009994427  | YES |
| PGS000364_hmPOS_GRCh37 | 3 | 107502947 | C | T | -0.003469653 | YES |
| PGS000364_hmPOS_GRCh37 | 3 | 107503063 | A | G | -0.003489771 | YES |
| PGS000364_hmPOS_GRCh37 | 3 | 107504143 | T | C | -0.003773491 | YES |
| PGS000364_hmPOS_GRCh37 | 3 | 107507776 | C | T | -0.003439766 | YES |
| PGS000364_hmPOS_GRCh37 | 3 | 107515310 | T | G | -0.003044923 | YES |
| PGS000364_hmPOS_GRCh37 | 3 | 107515483 | T | G | -0.003044132 | YES |
| PGS000364_hmPOS_GRCh37 | 3 | 107520406 | G | A | 0.002536762  | YES |
| PGS000364_hmPOS_GRCh37 | 3 | 127438887 | C | T | 0.003927729  | YES |
| PGS000364_hmPOS_GRCh37 | 3 | 127440083 | C | A | 0.003945228  | YES |
| PGS000364_hmPOS_GRCh37 | 3 | 127444862 | T | C | 0.003431459  | YES |
| PGS000364_hmPOS_GRCh37 | 3 | 127445412 | T | C | 0.001401884  | YES |
| PGS000364_hmPOS_GRCh37 | 3 | 127446371 | C | T | 0.00276407   | YES |
| PGS000364_hmPOS_GRCh37 | 3 | 127453530 | A | G | 0.003638112  | YES |
| PGS000364_hmPOS_GRCh37 | 3 | 127465159 | A | G | 0.000253271  | YES |
| PGS000364_hmPOS_GRCh37 | 3 | 127465870 | A | G | 0.000729894  | YES |
| PGS000364_hmPOS_GRCh37 | 3 | 130362816 | A | G | 0.013129977  | YES |
| PGS000364_hmPOS_GRCh37 | 3 | 130363448 | T | C | 0.013229944  | YES |
| PGS000364_hmPOS_GRCh37 | 3 | 130368069 | G | A | 0.014681339  | YES |
| PGS000364_hmPOS_GRCh37 | 3 | 130392340 | G | C | 0.019325753  | NO  |
| PGS000364_hmPOS_GRCh37 | 3 | 130446362 | T | C | 0.021706453  | YES |
| PGS000364_hmPOS_GRCh37 | 3 | 130478554 | A | G | 0.000404517  | YES |
| PGS000364_hmPOS_GRCh37 | 3 | 142016969 | T | C | 0.000949772  | YES |
| PGS000364_hmPOS_GRCh37 | 3 | 142879648 | T | C | 0.014539405  | YES |
| PGS000364_hmPOS_GRCh37 | 3 | 145063253 | C | T | 0.000309677  | YES |
| PGS000364_hmPOS_GRCh37 | 3 | 145871154 | C | T | 0.002298442  | YES |
| PGS000364_hmPOS_GRCh37 | 3 | 147410783 | T | C | 0.009823449  | YES |
| PGS000364_hmPOS_GRCh37 | 3 | 147412482 | T | C | 0.010059866  | YES |
| PGS000364_hmPOS_GRCh37 | 3 | 147412572 | A | G | 0.009949157  | YES |
| PGS000364_hmPOS_GRCh37 | 3 | 147553218 | C | T | 0.00431994   | YES |
| PGS000364_hmPOS_GRCh37 | 3 | 148894364 | T | A | -0.000140554 | NO  |
| PGS000364_hmPOS_GRCh37 | 3 | 148915721 | G | T | -0.003710891 | YES |
| PGS000364_hmPOS_GRCh37 | 3 | 148921843 | A | G | -0.002586419 | YES |
| PGS000364_hmPOS_GRCh37 | 3 | 148942394 | C | T | -0.007663154 | YES |
| PGS000364_hmPOS_GRCh37 | 3 | 162343579 | T | C | 0.000821669  | NO  |
| PGS000364_hmPOS_GRCh37 | 3 | 162375501 | A | T | 0.001034351  | NO  |
| PGS000364_hmPOS_GRCh37 | 3 | 162377127 | C | T | 0.001034351  | YES |
| PGS000364_hmPOS_GRCh37 | 3 | 162377525 | T | C | 0.001034798  | YES |
| PGS000364_hmPOS_GRCh37 | 3 | 166673264 | T | C | 0.000138672  | YES |

|                        |   |           |   |   |              |     |
|------------------------|---|-----------|---|---|--------------|-----|
| PGS000364_hmPOS_GRCh37 | 3 | 175542154 | G | A | 0.005446553  | YES |
| PGS000364_hmPOS_GRCh37 | 3 | 186915592 | A | G | 0.00533753   | YES |
| PGS000364_hmPOS_GRCh37 | 3 | 186941603 | G | A | 0.009132343  | YES |
| PGS000364_hmPOS_GRCh37 | 3 | 189455911 | G | C | 0.002915686  | NO  |
| PGS000364_hmPOS_GRCh37 | 3 | 195562342 | C | T | 0.009286117  | YES |
| PGS000364_hmPOS_GRCh37 | 3 | 196166769 | A | C | -0.00182654  | YES |
| PGS000364_hmPOS_GRCh37 | 3 | 196232298 | G | C | -0.0031544   | NO  |
| PGS000364_hmPOS_GRCh37 | 3 | 196233795 | A | G | -0.000470715 | YES |
| PGS000364_hmPOS_GRCh37 | 3 | 196238028 | G | A | -0.000694913 | YES |
| PGS000364_hmPOS_GRCh37 | 3 | 196252167 | G | A | -1.35E-06    | YES |
| PGS000364_hmPOS_GRCh37 | 3 | 196253722 | G | A | -0.001336563 | YES |
| PGS000364_hmPOS_GRCh37 | 3 | 196254442 | A | G | -0.001246299 | YES |
| PGS000364_hmPOS_GRCh37 | 3 | 196254741 | A | G | -0.001122382 | YES |
| PGS000364_hmPOS_GRCh37 | 3 | 196254970 | C | A | -0.001218677 | YES |
| PGS000364_hmPOS_GRCh37 | 3 | 196255010 | T | C | -0.001266417 | YES |
| PGS000364_hmPOS_GRCh37 | 3 | 196255042 | G | C | -0.00124257  | NO  |
| PGS000364_hmPOS_GRCh37 | 3 | 196255183 | G | A | -0.002552574 | YES |
| PGS000364_hmPOS_GRCh37 | 3 | 196255252 | A | C | -0.002472917 | YES |
| PGS000364_hmPOS_GRCh37 | 3 | 196255383 | A | G | -0.003787436 | YES |
| PGS000364_hmPOS_GRCh37 | 3 | 196255734 | C | G | -0.003431546 | NO  |
| PGS000364_hmPOS_GRCh37 | 3 | 196255862 | G | C | -3.44019E-05 | NO  |
| PGS000364_hmPOS_GRCh37 | 3 | 196255870 | C | G | -0.001323068 | NO  |
| PGS000364_hmPOS_GRCh37 | 3 | 196255954 | C | G | -0.001949399 | NO  |
| PGS000364_hmPOS_GRCh37 | 3 | 196256871 | C | G | 0.000796854  | NO  |
| PGS000364_hmPOS_GRCh37 | 3 | 196257452 | G | A | -0.001049418 | YES |
| PGS000364_hmPOS_GRCh37 | 3 | 196259144 | T | C | -0.002917207 | YES |
| PGS000364_hmPOS_GRCh37 | 3 | 196260352 | A | G | -0.001921374 | YES |
| PGS000364_hmPOS_GRCh37 | 3 | 196260587 | T | G | -0.001632142 | YES |
| PGS000364_hmPOS_GRCh37 | 3 | 196261452 | G | A | -0.001214524 | YES |
| PGS000364_hmPOS_GRCh37 | 3 | 196261460 | C | A | -0.001212779 | YES |
| PGS000364_hmPOS_GRCh37 | 3 | 196261613 | C | T | -0.001209992 | YES |
| PGS000364_hmPOS_GRCh37 | 3 | 196261782 | A | G | -0.000917224 | YES |
| PGS000364_hmPOS_GRCh37 | 3 | 196261842 | A | G | -0.001212759 | YES |
| PGS000364_hmPOS_GRCh37 | 3 | 196262048 | C | T | -0.001196218 | YES |
| PGS000364_hmPOS_GRCh37 | 3 | 196262526 | G | A | -0.001688134 | YES |
| PGS000364_hmPOS_GRCh37 | 3 | 196262697 | T | C | -0.001196278 | YES |
| PGS000364_hmPOS_GRCh37 | 3 | 196262959 | A | G | -0.00236879  | YES |
| PGS000364_hmPOS_GRCh37 | 3 | 196264256 | A | G | -0.000876859 | YES |
| PGS000364_hmPOS_GRCh37 | 3 | 196264286 | G | A | -0.001663789 | YES |
| PGS000364_hmPOS_GRCh37 | 3 | 196264713 | C | T | -0.00034082  | YES |
| PGS000364_hmPOS_GRCh37 | 3 | 196264893 | G | T | -0.001227797 | YES |
| PGS000364_hmPOS_GRCh37 | 3 | 196265174 | G | T | -0.000997783 | YES |
| PGS000364_hmPOS_GRCh37 | 3 | 196265996 | T | C | -0.001382692 | YES |
| PGS000364_hmPOS_GRCh37 | 3 | 196266051 | A | G | -0.001721826 | YES |
| PGS000364_hmPOS_GRCh37 | 3 | 196266606 | A | G | -0.002267988 | YES |
| PGS000364_hmPOS_GRCh37 | 3 | 196269890 | C | T | -0.008475848 | YES |
| PGS000364_hmPOS_GRCh37 | 3 | 196271307 | C | A | -0.00876747  | YES |
| PGS000364_hmPOS_GRCh37 | 3 | 196272079 | A | G | -0.002205699 | YES |
| PGS000364_hmPOS_GRCh37 | 3 | 196274965 | C | A | -0.00930506  | YES |
| PGS000364_hmPOS_GRCh37 | 3 | 196276600 | G | C | -0.009109302 | NO  |
| PGS000364_hmPOS_GRCh37 | 3 | 196278176 | C | A | -0.009585709 | YES |
| PGS000364_hmPOS_GRCh37 | 3 | 196278366 | T | C | -0.009532911 | YES |
| PGS000364_hmPOS_GRCh37 | 3 | 196280233 | G | A | -0.00279753  | YES |
| PGS000364_hmPOS_GRCh37 | 3 | 196280386 | G | A | -0.010658848 | YES |
| PGS000364_hmPOS_GRCh37 | 3 | 196280669 | G | A | -0.009360059 | YES |
| PGS000364_hmPOS_GRCh37 | 3 | 196281208 | C | T | -0.008873822 | YES |
| PGS000364_hmPOS_GRCh37 | 3 | 196283353 | C | G | -0.009239817 | NO  |
| PGS000364_hmPOS_GRCh37 | 3 | 196283444 | A | G | -0.008714299 | YES |
| PGS000364_hmPOS_GRCh37 | 3 | 196283477 | C | A | -0.008683517 | YES |
| PGS000364_hmPOS_GRCh37 | 3 | 196284063 | A | C | -0.002050163 | YES |
| PGS000364_hmPOS_GRCh37 | 3 | 196286146 | C | G | -0.001728093 | NO  |
| PGS000364_hmPOS_GRCh37 | 3 | 196286536 | A | G | -0.002022189 | YES |
| PGS000364_hmPOS_GRCh37 | 3 | 196288777 | A | G | -0.008048956 | YES |

|                        |   |           |   |   |              |     |
|------------------------|---|-----------|---|---|--------------|-----|
| PGS000364_hmPOS_GRCh37 | 3 | 196288847 | C | T | -0.008382025 | YES |
| PGS000364_hmPOS_GRCh37 | 3 | 196289014 | G | C | -0.001672355 | NO  |
| PGS000364_hmPOS_GRCh37 | 3 | 196289387 | T | C | -0.001542614 | YES |
| PGS000364_hmPOS_GRCh37 | 3 | 196292385 | G | A | -0.012229717 | YES |
| PGS000364_hmPOS_GRCh37 | 3 | 196292987 | G | A | -0.008194284 | YES |
| PGS000364_hmPOS_GRCh37 | 3 | 196293516 | C | T | -0.007070052 | YES |
| PGS000364_hmPOS_GRCh37 | 3 | 196294755 | A | G | -0.003734556 | YES |
| PGS000364_hmPOS_GRCh37 | 3 | 196295163 | G | A | -0.003662726 | YES |
| PGS000364_hmPOS_GRCh37 | 3 | 196296320 | T | C | 0.002268036  | YES |
| PGS000364_hmPOS_GRCh37 | 4 | 1889648   | C | T | -0.00898492  | YES |
| PGS000364_hmPOS_GRCh37 | 4 | 2159978   | G | C | 0.004750519  | NO  |
| PGS000364_hmPOS_GRCh37 | 4 | 2181864   | T | C | 0.006804361  | YES |
| PGS000364_hmPOS_GRCh37 | 4 | 2211314   | A | G | 0.00341886   | YES |
| PGS000364_hmPOS_GRCh37 | 4 | 3902018   | T | G | 0.003429886  | YES |
| PGS000364_hmPOS_GRCh37 | 4 | 3903945   | G | A | 0.005042835  | YES |
| PGS000364_hmPOS_GRCh37 | 4 | 3906926   | C | G | 0.004189622  | NO  |
| PGS000364_hmPOS_GRCh37 | 4 | 3909117   | A | C | 0.001923338  | YES |
| PGS000364_hmPOS_GRCh37 | 4 | 3911370   | A | G | 0.001031314  | YES |
| PGS000364_hmPOS_GRCh37 | 4 | 3914204   | C | A | 0.000156387  | YES |
| PGS000364_hmPOS_GRCh37 | 4 | 16478955  | A | G | 0.003105067  | YES |
| PGS000364_hmPOS_GRCh37 | 4 | 17298632  | A | C | 0.000979216  | YES |
| PGS000364_hmPOS_GRCh37 | 4 | 17299793  | G | A | 0.000721458  | YES |
| PGS000364_hmPOS_GRCh37 | 4 | 17302823  | C | G | 0.000163096  | NO  |
| PGS000364_hmPOS_GRCh37 | 4 | 17303802  | C | T | 0.001202     | YES |
| PGS000364_hmPOS_GRCh37 | 4 | 17305195  | C | T | 0.001744458  | YES |
| PGS000364_hmPOS_GRCh37 | 4 | 17305208  | C | T | 0.001142822  | YES |
| PGS000364_hmPOS_GRCh37 | 4 | 17306702  | G | T | 0.000860588  | YES |
| PGS000364_hmPOS_GRCh37 | 4 | 24458145  | C | T | 0.00613632   | YES |
| PGS000364_hmPOS_GRCh37 | 4 | 24462075  | A | G | 0.005220977  | YES |
| PGS000364_hmPOS_GRCh37 | 4 | 24462248  | C | G | 0.006687342  | NO  |
| PGS000364_hmPOS_GRCh37 | 4 | 31703249  | T | C | 0.00437057   | YES |
| PGS000364_hmPOS_GRCh37 | 4 | 40338079  | A | G | 0.024768585  | YES |
| PGS000364_hmPOS_GRCh37 | 4 | 59396970  | T | C | 0.004314379  | YES |
| PGS000364_hmPOS_GRCh37 | 4 | 73854746  | A | G | 0.005597586  | YES |
| PGS000364_hmPOS_GRCh37 | 4 | 82474592  | T | C | 0.007569317  | YES |
| PGS000364_hmPOS_GRCh37 | 4 | 91311465  | A | G | 0.009393752  | YES |
| PGS000364_hmPOS_GRCh37 | 4 | 95019067  | A | G | 7.8591E-05   | YES |
| PGS000364_hmPOS_GRCh37 | 4 | 101460676 | A | T | -0.007154023 | NO  |
| PGS000364_hmPOS_GRCh37 | 4 | 101463177 | G | A | -0.004713072 | YES |
| PGS000364_hmPOS_GRCh37 | 4 | 101507954 | G | A | -0.000291752 | YES |
| PGS000364_hmPOS_GRCh37 | 4 | 101507968 | A | G | -0.000220816 | YES |
| PGS000364_hmPOS_GRCh37 | 4 | 101508001 | A | G | -0.001020602 | YES |
| PGS000364_hmPOS_GRCh37 | 4 | 101508721 | A | C | -0.002796013 | YES |
| PGS000364_hmPOS_GRCh37 | 4 | 101508727 | A | G | -0.001577306 | YES |
| PGS000364_hmPOS_GRCh37 | 4 | 101510000 | G | A | -0.002603427 | YES |
| PGS000364_hmPOS_GRCh37 | 4 | 109659741 | A | G | 0.002502775  | YES |
| PGS000364_hmPOS_GRCh37 | 4 | 109685983 | A | G | 0.005131332  | YES |
| PGS000364_hmPOS_GRCh37 | 4 | 109690334 | T | C | 0.004197156  | YES |
| PGS000364_hmPOS_GRCh37 | 4 | 109694619 | A | C | 0.002535435  | YES |
| PGS000364_hmPOS_GRCh37 | 4 | 115381722 | T | C | 0.003846519  | YES |
| PGS000364_hmPOS_GRCh37 | 4 | 122157569 | C | T | 0.000276715  | YES |
| PGS000364_hmPOS_GRCh37 | 4 | 124302098 | A | G | 0.001420308  | YES |
| PGS000364_hmPOS_GRCh37 | 4 | 128656054 | A | G | 0.002232434  | YES |
| PGS000364_hmPOS_GRCh37 | 4 | 128959213 | A | G | 0.010032209  | YES |
| PGS000364_hmPOS_GRCh37 | 4 | 128967824 | C | T | 0.013536533  | YES |
| PGS000364_hmPOS_GRCh37 | 4 | 128993780 | T | C | 0.010977221  | YES |
| PGS000364_hmPOS_GRCh37 | 4 | 129022604 | G | A | 0.010189766  | YES |
| PGS000364_hmPOS_GRCh37 | 4 | 129024273 | T | C | 0.012786266  | YES |
| PGS000364_hmPOS_GRCh37 | 4 | 129034787 | T | C | 0.012139802  | YES |
| PGS000364_hmPOS_GRCh37 | 4 | 129036153 | T | C | 0.012120484  | YES |
| PGS000364_hmPOS_GRCh37 | 4 | 129047537 | A | G | 0.012261125  | YES |
| PGS000364_hmPOS_GRCh37 | 4 | 129047722 | C | A | 0.012270507  | YES |
| PGS000364_hmPOS_GRCh37 | 4 | 129055474 | G | A | 0.012206155  | YES |

|                        |   |           |   |   |              |     |
|------------------------|---|-----------|---|---|--------------|-----|
| PGS000364_hmPOS_GRCh37 | 4 | 129084813 | C | T | 0.010750275  | YES |
| PGS000364_hmPOS_GRCh37 | 4 | 129115454 | C | T | 0.009507701  | YES |
| PGS000364_hmPOS_GRCh37 | 4 | 129125483 | G | A | 0.010015315  | YES |
| PGS000364_hmPOS_GRCh37 | 4 | 129132929 | T | C | 0.008713789  | YES |
| PGS000364_hmPOS_GRCh37 | 4 | 142811893 | T | C | -0.003679446 | YES |
| PGS000364_hmPOS_GRCh37 | 4 | 142811946 | A | C | -0.003702495 | YES |
| PGS000364_hmPOS_GRCh37 | 4 | 142812073 | T | C | -0.003805697 | YES |
| PGS000364_hmPOS_GRCh37 | 4 | 142814856 | G | A | -0.00199894  | YES |
| PGS000364_hmPOS_GRCh37 | 4 | 142815639 | A | G | -0.001726673 | YES |
| PGS000364_hmPOS_GRCh37 | 4 | 142816579 | G | C | -0.003478808 | NO  |
| PGS000364_hmPOS_GRCh37 | 4 | 142836961 | G | A | -0.001158024 | YES |
| PGS000364_hmPOS_GRCh37 | 4 | 143243556 | T | C | -0.00226488  | YES |
| PGS000364_hmPOS_GRCh37 | 4 | 143244840 | C | T | -0.01755302  | YES |
| PGS000364_hmPOS_GRCh37 | 4 | 143255255 | A | G | -7.19572E-05 | YES |
| PGS000364_hmPOS_GRCh37 | 4 | 143257940 | T | C | -0.001868063 | YES |
| PGS000364_hmPOS_GRCh37 | 4 | 143264762 | C | G | -5.0509E-05  | NO  |
| PGS000364_hmPOS_GRCh37 | 4 | 143265405 | A | G | -0.000306844 | YES |
| PGS000364_hmPOS_GRCh37 | 4 | 143265572 | A | G | -0.000299957 | YES |
| PGS000364_hmPOS_GRCh37 | 4 | 143265791 | T | C | -0.000330721 | YES |
| PGS000364_hmPOS_GRCh37 | 4 | 143268348 | A | G | -0.002917607 | YES |
| PGS000364_hmPOS_GRCh37 | 4 | 143268528 | A | T | -0.002863752 | NO  |
| PGS000364_hmPOS_GRCh37 | 4 | 143269745 | A | T | -0.002740453 | NO  |
| PGS000364_hmPOS_GRCh37 | 4 | 143277523 | A | G | -0.003316033 | YES |
| PGS000364_hmPOS_GRCh37 | 4 | 143786032 | A | G | 0.013655211  | YES |
| PGS000364_hmPOS_GRCh37 | 4 | 146562236 | T | C | 0.002131489  | YES |
| PGS000364_hmPOS_GRCh37 | 4 | 146562933 | T | C | 0.001302395  | YES |
| PGS000364_hmPOS_GRCh37 | 4 | 153662207 | A | G | 0.005063134  | YES |
| PGS000364_hmPOS_GRCh37 | 4 | 177958179 | T | C | 0.001516595  | YES |
| PGS000364_hmPOS_GRCh37 | 4 | 181580491 | T | C | 0.005199363  | YES |
| PGS000364_hmPOS_GRCh37 | 4 | 187406118 | C | G | 0.001315374  | NO  |
| PGS000364_hmPOS_GRCh37 | 4 | 189991096 | C | G | 1.1176E-05   | NO  |
| PGS000364_hmPOS_GRCh37 | 5 | 1124703   | T | C | 0.00845713   | YES |
| PGS000364_hmPOS_GRCh37 | 5 | 1125033   | T | C | 0.008620539  | YES |
| PGS000364_hmPOS_GRCh37 | 5 | 3573929   | T | A | 0.006259944  | NO  |
| PGS000364_hmPOS_GRCh37 | 5 | 13910597  | C | G | -0.010136154 | NO  |
| PGS000364_hmPOS_GRCh37 | 5 | 25346330  | C | G | 0.001075647  | NO  |
| PGS000364_hmPOS_GRCh37 | 5 | 37680949  | A | G | -0.001197578 | YES |
| PGS000364_hmPOS_GRCh37 | 5 | 53214068  | T | C | 0.010299046  | YES |
| PGS000364_hmPOS_GRCh37 | 5 | 66431562  | G | C | 3.84495E-05  | NO  |
| PGS000364_hmPOS_GRCh37 | 5 | 66807910  | A | C | -0.000357461 | YES |
| PGS000364_hmPOS_GRCh37 | 5 | 66814587  | A | G | -0.004433778 | YES |
| PGS000364_hmPOS_GRCh37 | 5 | 66814842  | C | T | -0.000152076 | YES |
| PGS000364_hmPOS_GRCh37 | 5 | 72515051  | C | T | 0.00034511   | YES |
| PGS000364_hmPOS_GRCh37 | 5 | 72518148  | C | T | 0.002864916  | YES |
| PGS000364_hmPOS_GRCh37 | 5 | 72518452  | G | A | 0.001411493  | YES |
| PGS000364_hmPOS_GRCh37 | 5 | 72519678  | G | A | 0.001440871  | YES |
| PGS000364_hmPOS_GRCh37 | 5 | 72520347  | T | A | 0.002512711  | NO  |
| PGS000364_hmPOS_GRCh37 | 5 | 72520535  | T | C | 0.001889864  | YES |
| PGS000364_hmPOS_GRCh37 | 5 | 72521202  | G | A | 0.001527699  | YES |
| PGS000364_hmPOS_GRCh37 | 5 | 72521622  | G | C | 0.001514085  | NO  |
| PGS000364_hmPOS_GRCh37 | 5 | 72521854  | T | C | 0.001594952  | YES |
| PGS000364_hmPOS_GRCh37 | 5 | 72522437  | T | C | 0.001488566  | YES |
| PGS000364_hmPOS_GRCh37 | 5 | 72523428  | C | T | 0.000876613  | YES |
| PGS000364_hmPOS_GRCh37 | 5 | 72524578  | C | T | 0.001333043  | YES |
| PGS000364_hmPOS_GRCh37 | 5 | 72525986  | A | G | 0.001569237  | YES |
| PGS000364_hmPOS_GRCh37 | 5 | 72527849  | C | T | 0.000241488  | YES |
| PGS000364_hmPOS_GRCh37 | 5 | 72528922  | C | A | 0.000337712  | YES |
| PGS000364_hmPOS_GRCh37 | 5 | 72529325  | T | C | 0.000415951  | YES |
| PGS000364_hmPOS_GRCh37 | 5 | 72531994  | C | A | 0.000986358  | YES |
| PGS000364_hmPOS_GRCh37 | 5 | 72539850  | A | C | 0.00543699   | YES |
| PGS000364_hmPOS_GRCh37 | 5 | 72541598  | C | A | 0.004241398  | YES |
| PGS000364_hmPOS_GRCh37 | 5 | 72541687  | A | G | 0.005683243  | YES |
| PGS000364_hmPOS_GRCh37 | 5 | 72542050  | A | C | 0.004333185  | YES |

|                        |   |           |   |   |              |     |
|------------------------|---|-----------|---|---|--------------|-----|
| PGS000364_hmPOS_GRCh37 | 5 | 72543056  | G | A | 0.004706068  | YES |
| PGS000364_hmPOS_GRCh37 | 5 | 72543213  | T | G | 0.004783909  | YES |
| PGS000364_hmPOS_GRCh37 | 5 | 72543998  | T | C | 0.004526791  | YES |
| PGS000364_hmPOS_GRCh37 | 5 | 72544390  | C | T | 0.004164896  | YES |
| PGS000364_hmPOS_GRCh37 | 5 | 72545909  | C | T | 0.004303747  | YES |
| PGS000364_hmPOS_GRCh37 | 5 | 72550088  | G | T | 0.00464898   | YES |
| PGS000364_hmPOS_GRCh37 | 5 | 72551134  | G | A | 0.004679727  | YES |
| PGS000364_hmPOS_GRCh37 | 5 | 72559339  | G | T | 0.012734895  | YES |
| PGS000364_hmPOS_GRCh37 | 5 | 89867373  | G | A | 0.004688253  | YES |
| PGS000364_hmPOS_GRCh37 | 5 | 89889650  | C | T | 0.009919211  | YES |
| PGS000364_hmPOS_GRCh37 | 5 | 89977598  | A | G | 3.99701E-05  | YES |
| PGS000364_hmPOS_GRCh37 | 5 | 105896673 | T | A | -0.002939266 | NO  |
| PGS000364_hmPOS_GRCh37 | 5 | 105899335 | A | G | -0.001265405 | YES |
| PGS000364_hmPOS_GRCh37 | 5 | 105902493 | G | A | -0.002742473 | YES |
| PGS000364_hmPOS_GRCh37 | 5 | 105904156 | C | T | -0.003384866 | YES |
| PGS000364_hmPOS_GRCh37 | 5 | 105905893 | A | G | -0.003036638 | YES |
| PGS000364_hmPOS_GRCh37 | 5 | 105909464 | A | G | -0.002261677 | YES |
| PGS000364_hmPOS_GRCh37 | 5 | 105910403 | G | C | -0.003355608 | NO  |
| PGS000364_hmPOS_GRCh37 | 5 | 105911088 | T | A | -0.003390127 | NO  |
| PGS000364_hmPOS_GRCh37 | 5 | 105916636 | T | A | -0.002350719 | NO  |
| PGS000364_hmPOS_GRCh37 | 5 | 105920735 | T | G | -0.004108002 | YES |
| PGS000364_hmPOS_GRCh37 | 5 | 105948256 | G | C | 0.001858118  | NO  |
| PGS000364_hmPOS_GRCh37 | 5 | 106005120 | G | A | -0.000701322 | YES |
| PGS000364_hmPOS_GRCh37 | 5 | 106006952 | C | G | -0.000897075 | NO  |
| PGS000364_hmPOS_GRCh37 | 5 | 106009952 | G | T | -0.001244969 | YES |
| PGS000364_hmPOS_GRCh37 | 5 | 106010168 | C | T | -0.001285526 | YES |
| PGS000364_hmPOS_GRCh37 | 5 | 106016806 | C | G | -0.000380611 | NO  |
| PGS000364_hmPOS_GRCh37 | 5 | 117692172 | C | T | 0.000959667  | YES |
| PGS000364_hmPOS_GRCh37 | 5 | 117697578 | G | A | 0.000111617  | YES |
| PGS000364_hmPOS_GRCh37 | 5 | 117701098 | G | C | 0.010263914  | NO  |
| PGS000364_hmPOS_GRCh37 | 5 | 117701468 | A | G | 0.002074076  | YES |
| PGS000364_hmPOS_GRCh37 | 5 | 117709592 | A | G | 0.000786231  | YES |
| PGS000364_hmPOS_GRCh37 | 5 | 119675960 | T | G | -0.00080712  | YES |
| PGS000364_hmPOS_GRCh37 | 5 | 119781866 | G | T | -0.000524633 | YES |
| PGS000364_hmPOS_GRCh37 | 5 | 119789295 | G | A | -0.001473303 | YES |
| PGS000364_hmPOS_GRCh37 | 5 | 119791574 | T | G | -0.001107663 | YES |
| PGS000364_hmPOS_GRCh37 | 5 | 119801534 | G | C | -0.004371563 | NO  |
| PGS000364_hmPOS_GRCh37 | 5 | 119857153 | T | C | -0.003012964 | YES |
| PGS000364_hmPOS_GRCh37 | 5 | 119862127 | G | A | -0.000642625 | YES |
| PGS000364_hmPOS_GRCh37 | 5 | 119864882 | T | A | -0.000429768 | NO  |
| PGS000364_hmPOS_GRCh37 | 5 | 121756884 | T | C | 0.002626605  | YES |
| PGS000364_hmPOS_GRCh37 | 5 | 124679571 | G | A | 0.001502522  | YES |
| PGS000364_hmPOS_GRCh37 | 5 | 124725647 | T | C | 0.01136001   | YES |
| PGS000364_hmPOS_GRCh37 | 5 | 124854331 | C | T | 0.006906936  | YES |
| PGS000364_hmPOS_GRCh37 | 5 | 124900867 | A | C | 0.000226131  | YES |
| PGS000364_hmPOS_GRCh37 | 5 | 124914586 | A | C | 0.011592178  | YES |
| PGS000364_hmPOS_GRCh37 | 5 | 124941524 | C | T | 0.012935174  | YES |
| PGS000364_hmPOS_GRCh37 | 5 | 124943054 | T | G | 0.006154137  | YES |
| PGS000364_hmPOS_GRCh37 | 5 | 124960510 | T | C | 0.014505994  | YES |
| PGS000364_hmPOS_GRCh37 | 5 | 125055586 | T | C | 0.005598772  | YES |
| PGS000364_hmPOS_GRCh37 | 5 | 125121440 | C | T | 0.002100993  | YES |
| PGS000364_hmPOS_GRCh37 | 5 | 148223138 | C | A | 0.008104573  | YES |
| PGS000364_hmPOS_GRCh37 | 5 | 152180918 | T | C | 0.004665845  | YES |
| PGS000364_hmPOS_GRCh37 | 5 | 152207669 | C | A | 0.001074883  | YES |
| PGS000364_hmPOS_GRCh37 | 5 | 152210177 | A | G | 0.000780161  | YES |
| PGS000364_hmPOS_GRCh37 | 5 | 162387260 | G | A | 0.006634154  | YES |
| PGS000364_hmPOS_GRCh37 | 5 | 163550616 | T | A | 0.000680683  | NO  |
| PGS000364_hmPOS_GRCh37 | 5 | 163550678 | C | G | 0.00029575   | NO  |
| PGS000364_hmPOS_GRCh37 | 5 | 171635750 | C | T | 0.001095064  | YES |
| PGS000364_hmPOS_GRCh37 | 5 | 171636059 | C | T | 0.002036413  | YES |
| PGS000364_hmPOS_GRCh37 | 5 | 171637347 | C | G | 0.002071808  | NO  |
| PGS000364_hmPOS_GRCh37 | 5 | 171664504 | C | T | 0.006006998  | YES |
| PGS000364_hmPOS_GRCh37 | 5 | 171672429 | C | T | 0.005069581  | YES |

|                        |   |           |   |   |              |     |
|------------------------|---|-----------|---|---|--------------|-----|
| PGS000364_hmPOS_GRCh37 | 5 | 171683884 | C | T | 0.006160259  | YES |
| PGS000364_hmPOS_GRCh37 | 5 | 171685829 | G | A | 0.006163627  | YES |
| PGS000364_hmPOS_GRCh37 | 5 | 171709497 | C | G | 0.007481378  | NO  |
| PGS000364_hmPOS_GRCh37 | 5 | 172872410 | G | A | 0.006708635  | YES |
| PGS000364_hmPOS_GRCh37 | 5 | 172872881 | G | A | 0.007329792  | YES |
| PGS000364_hmPOS_GRCh37 | 5 | 172880042 | T | C | 0.007248177  | YES |
| PGS000364_hmPOS_GRCh37 | 5 | 172881712 | C | T | 0.007038286  | YES |
| PGS000364_hmPOS_GRCh37 | 5 | 172884244 | G | C | 0.007056802  | NO  |
| PGS000364_hmPOS_GRCh37 | 5 | 172886986 | C | G | 0.00580999   | NO  |
| PGS000364_hmPOS_GRCh37 | 5 | 173206446 | G | A | 0.000734302  | YES |
| PGS000364_hmPOS_GRCh37 | 5 | 177926531 | C | A | 0.000591055  | YES |
| PGS000364_hmPOS_GRCh37 | 5 | 177928404 | C | T | 0.000369069  | YES |
| PGS000364_hmPOS_GRCh37 | 6 | 1671997   | T | C | 0.004777113  | YES |
| PGS000364_hmPOS_GRCh37 | 6 | 1675928   | C | T | 0.004357649  | YES |
| PGS000364_hmPOS_GRCh37 | 6 | 1682704   | C | T | 0.003588834  | YES |
| PGS000364_hmPOS_GRCh37 | 6 | 1683287   | T | C | 0.003497896  | YES |
| PGS000364_hmPOS_GRCh37 | 6 | 3441938   | A | T | 0.001093197  | NO  |
| PGS000364_hmPOS_GRCh37 | 6 | 3742857   | G | A | 0.003159626  | YES |
| PGS000364_hmPOS_GRCh37 | 6 | 19569186  | A | G | 0.014651283  | YES |
| PGS000364_hmPOS_GRCh37 | 6 | 19601623  | T | C | 0.014244222  | YES |
| PGS000364_hmPOS_GRCh37 | 6 | 19611195  | A | T | 0.013543506  | NO  |
| PGS000364_hmPOS_GRCh37 | 6 | 24449382  | C | G | 0.001722808  | NO  |
| PGS000364_hmPOS_GRCh37 | 6 | 24449405  | C | T | 0.001631239  | YES |
| PGS000364_hmPOS_GRCh37 | 6 | 41656820  | T | C | 0.000976516  | YES |
| PGS000364_hmPOS_GRCh37 | 6 | 43655832  | G | C | 0.001130269  | NO  |
| PGS000364_hmPOS_GRCh37 | 6 | 49771994  | A | C | -0.002299764 | YES |
| PGS000364_hmPOS_GRCh37 | 6 | 51239904  | C | G | 0.010095234  | NO  |
| PGS000364_hmPOS_GRCh37 | 6 | 51279138  | T | G | 0.00693884   | YES |
| PGS000364_hmPOS_GRCh37 | 6 | 51297423  | A | G | 0.001176633  | YES |
| PGS000364_hmPOS_GRCh37 | 6 | 57125194  | G | A | 0.005962068  | YES |
| PGS000364_hmPOS_GRCh37 | 6 | 87805210  | T | A | 0.000274121  | NO  |
| PGS000364_hmPOS_GRCh37 | 6 | 87805592  | T | C | 0.000255548  | YES |
| PGS000364_hmPOS_GRCh37 | 6 | 87805890  | G | T | 0.000243009  | YES |
| PGS000364_hmPOS_GRCh37 | 6 | 87807180  | G | A | 0.001197318  | YES |
| PGS000364_hmPOS_GRCh37 | 6 | 87808430  | T | A | 0.000229728  | NO  |
| PGS000364_hmPOS_GRCh37 | 6 | 88830565  | G | T | -1.36279E-05 | YES |
| PGS000364_hmPOS_GRCh37 | 6 | 97461972  | A | G | 0.00272315   | YES |
| PGS000364_hmPOS_GRCh37 | 6 | 105003599 | A | G | 0.01472284   | YES |
| PGS000364_hmPOS_GRCh37 | 6 | 105207689 | G | A | 0.01412758   | YES |
| PGS000364_hmPOS_GRCh37 | 6 | 105336393 | A | G | 0.012148552  | YES |
| PGS000364_hmPOS_GRCh37 | 6 | 105349842 | A | C | 0.009773943  | YES |
| PGS000364_hmPOS_GRCh37 | 6 | 105446339 | T | A | 0.005208141  | NO  |
| PGS000364_hmPOS_GRCh37 | 6 | 105462351 | T | C | 0.00656456   | YES |
| PGS000364_hmPOS_GRCh37 | 6 | 105625409 | T | C | 0.001080471  | YES |
| PGS000364_hmPOS_GRCh37 | 6 | 112306397 | G | T | 0.001671749  | YES |
| PGS000364_hmPOS_GRCh37 | 6 | 112306744 | A | T | 0.002504791  | NO  |
| PGS000364_hmPOS_GRCh37 | 6 | 112308562 | G | A | 0.00406012   | NO  |
| PGS000364_hmPOS_GRCh37 | 6 | 112321699 | A | G | 0.003179404  | YES |
| PGS000364_hmPOS_GRCh37 | 6 | 112326344 | T | C | 0.003143047  | YES |
| PGS000364_hmPOS_GRCh37 | 6 | 112332250 | A | T | 0.00318415   | NO  |
| PGS000364_hmPOS_GRCh37 | 6 | 112332529 | G | C | 0.003225345  | NO  |
| PGS000364_hmPOS_GRCh37 | 6 | 123729699 | C | T | -2.7024E-05  | YES |
| PGS000364_hmPOS_GRCh37 | 6 | 125612350 | A | G | 0.000815339  | YES |
| PGS000364_hmPOS_GRCh37 | 6 | 136387111 | G | A | 0.002484738  | YES |
| PGS000364_hmPOS_GRCh37 | 6 | 136594187 | T | C | 0.007356564  | YES |
| PGS000364_hmPOS_GRCh37 | 6 | 138879771 | T | C | 0.020633992  | YES |
| PGS000364_hmPOS_GRCh37 | 6 | 144089607 | A | G | 2.84263E-05  | YES |
| PGS000364_hmPOS_GRCh37 | 6 | 158036144 | A | G | -0.008162692 | YES |
| PGS000364_hmPOS_GRCh37 | 6 | 158036684 | C | T | -0.007781472 | YES |
| PGS000364_hmPOS_GRCh37 | 6 | 158036933 | G | A | -0.006396654 | YES |
| PGS000364_hmPOS_GRCh37 | 6 | 158038751 | A | G | -0.005718743 | YES |
| PGS000364_hmPOS_GRCh37 | 6 | 158038975 | G | A | -0.005740375 | YES |
| PGS000364_hmPOS_GRCh37 | 6 | 158040365 | G | A | -0.00706209  | YES |

|                        |   |           |   |   |              |     |
|------------------------|---|-----------|---|---|--------------|-----|
| PGS000364_hmPOS_GRCh37 | 6 | 158040465 | G | A | -0.006108448 | YES |
| PGS000364_hmPOS_GRCh37 | 6 | 158040969 | G | C | -0.006909926 | NO  |
| PGS000364_hmPOS_GRCh37 | 6 | 158041022 | T | G | -0.006571396 | YES |
| PGS000364_hmPOS_GRCh37 | 6 | 158041511 | T | G | -0.004031708 | YES |
| PGS000364_hmPOS_GRCh37 | 6 | 158042765 | A | G | -0.003792019 | YES |
| PGS000364_hmPOS_GRCh37 | 6 | 158043637 | G | C | -0.006299873 | NO  |
| PGS000364_hmPOS_GRCh37 | 6 | 158043779 | C | T | -0.005920537 | YES |
| PGS000364_hmPOS_GRCh37 | 6 | 158053181 | A | G | -0.002566718 | YES |
| PGS000364_hmPOS_GRCh37 | 6 | 158053235 | T | C | -0.000938303 | YES |
| PGS000364_hmPOS_GRCh37 | 6 | 158132487 | T | A | 0.000938916  | NO  |
| PGS000364_hmPOS_GRCh37 | 6 | 160808901 | T | G | 0.003409741  | YES |
| PGS000364_hmPOS_GRCh37 | 6 | 160822675 | G | A | 0.003341966  | YES |
| PGS000364_hmPOS_GRCh37 | 6 | 160833664 | T | C | 0.002312257  | YES |
| PGS000364_hmPOS_GRCh37 | 6 | 160834515 | C | T | 0.00203945   | YES |
| PGS000364_hmPOS_GRCh37 | 6 | 160835192 | A | C | 0.002398152  | YES |
| PGS000364_hmPOS_GRCh37 | 6 | 161502445 | T | C | -0.000722235 | YES |
| PGS000364_hmPOS_GRCh37 | 6 | 162935587 | T | C | 0.018734717  | YES |
| PGS000364_hmPOS_GRCh37 | 6 | 162952921 | A | G | 0.019262416  | YES |
| PGS000364_hmPOS_GRCh37 | 6 | 163402433 | T | C | -0.01048161  | YES |
| PGS000364_hmPOS_GRCh37 | 6 | 165969237 | C | A | 0.002499889  | YES |
| PGS000364_hmPOS_GRCh37 | 6 | 166196371 | C | T | 0.006900854  | YES |
| PGS000364_hmPOS_GRCh37 | 6 | 167576698 | C | A | 0.000518641  | YES |
| PGS000364_hmPOS_GRCh37 | 6 | 167647068 | A | G | -0.0010594   | YES |
| PGS000364_hmPOS_GRCh37 | 7 | 809825    | A | G | 0.006721119  | YES |
| PGS000364_hmPOS_GRCh37 | 7 | 4250040   | T | C | 0.012264536  | YES |
| PGS000364_hmPOS_GRCh37 | 7 | 5623731   | T | C | 0.000797078  | YES |
| PGS000364_hmPOS_GRCh37 | 7 | 5642631   | A | G | 4.64204E-05  | YES |
| PGS000364_hmPOS_GRCh37 | 7 | 5644243   | A | G | 0.001146133  | YES |
| PGS000364_hmPOS_GRCh37 | 7 | 14931662  | T | G | -0.00094555  | YES |
| PGS000364_hmPOS_GRCh37 | 7 | 15481653  | C | G | -0.002049333 | NO  |
| PGS000364_hmPOS_GRCh37 | 7 | 15482665  | G | C | -0.002656024 | NO  |
| PGS000364_hmPOS_GRCh37 | 7 | 15484961  | T | A | -0.00267139  | NO  |
| PGS000364_hmPOS_GRCh37 | 7 | 15485123  | T | C | -0.002177859 | YES |
| PGS000364_hmPOS_GRCh37 | 7 | 15493547  | C | T | -0.00349395  | YES |
| PGS000364_hmPOS_GRCh37 | 7 | 17887004  | C | G | 0.001157389  | NO  |
| PGS000364_hmPOS_GRCh37 | 7 | 19254640  | C | T | -0.002090328 | YES |
| PGS000364_hmPOS_GRCh37 | 7 | 19254715  | A | G | -0.002561941 | YES |
| PGS000364_hmPOS_GRCh37 | 7 | 19254726  | A | G | -0.005775797 | YES |
| PGS000364_hmPOS_GRCh37 | 7 | 19257738  | C | G | -0.001880309 | NO  |
| PGS000364_hmPOS_GRCh37 | 7 | 19258451  | G | A | -0.001616766 | YES |
| PGS000364_hmPOS_GRCh37 | 7 | 19260180  | A | T | -0.001643074 | NO  |
| PGS000364_hmPOS_GRCh37 | 7 | 19261413  | C | A | -0.001525692 | YES |
| PGS000364_hmPOS_GRCh37 | 7 | 19261523  | A | T | -0.000478721 | NO  |
| PGS000364_hmPOS_GRCh37 | 7 | 19261584  | A | G | -0.00160019  | YES |
| PGS000364_hmPOS_GRCh37 | 7 | 19262091  | T | C | -0.000751519 | YES |
| PGS000364_hmPOS_GRCh37 | 7 | 19262783  | C | A | -0.006330536 | YES |
| PGS000364_hmPOS_GRCh37 | 7 | 19264504  | T | C | -0.005995766 | YES |
| PGS000364_hmPOS_GRCh37 | 7 | 19264888  | A | G | -0.002329003 | YES |
| PGS000364_hmPOS_GRCh37 | 7 | 19265301  | G | T | -0.002626351 | YES |
| PGS000364_hmPOS_GRCh37 | 7 | 19267296  | A | T | -0.003019369 | NO  |
| PGS000364_hmPOS_GRCh37 | 7 | 19267342  | G | C | -0.003302683 | NO  |
| PGS000364_hmPOS_GRCh37 | 7 | 19269017  | G | A | -0.001656725 | YES |
| PGS000364_hmPOS_GRCh37 | 7 | 19270317  | G | T | -0.002350864 | YES |
| PGS000364_hmPOS_GRCh37 | 7 | 19271417  | C | T | -0.001730628 | YES |
| PGS000364_hmPOS_GRCh37 | 7 | 19271726  | C | A | -0.005410896 | YES |
| PGS000364_hmPOS_GRCh37 | 7 | 19274183  | C | T | -0.007309493 | YES |
| PGS000364_hmPOS_GRCh37 | 7 | 19274665  | C | T | -0.001533365 | YES |
| PGS000364_hmPOS_GRCh37 | 7 | 19463507  | C | T | -0.001963768 | YES |
| PGS000364_hmPOS_GRCh37 | 7 | 22497005  | G | A | 0.000584002  | YES |
| PGS000364_hmPOS_GRCh37 | 7 | 28408943  | C | T | 0.004215619  | YES |
| PGS000364_hmPOS_GRCh37 | 7 | 31006942  | G | A | -0.001542487 | YES |
| PGS000364_hmPOS_GRCh37 | 7 | 31136610  | A | C | 0.001551539  | YES |
| PGS000364_hmPOS_GRCh37 | 7 | 43473208  | G | C | 0.005347253  | NO  |



|                        |   |           |   |   |              |     |
|------------------------|---|-----------|---|---|--------------|-----|
| PGS000364_hmPOS_GRCh37 | 7 | 43474087  | G | A | 0.008057458  | YES |
| PGS000364_hmPOS_GRCh37 | 7 | 43474488  | A | G | 0.008056349  | YES |
| PGS000364_hmPOS_GRCh37 | 7 | 44792994  | T | C | 0.003309297  | YES |
| PGS000364_hmPOS_GRCh37 | 7 | 69238281  | A | G | -0.005315069 | YES |
| PGS000364_hmPOS_GRCh37 | 7 | 69252380  | A | C | -0.000141125 | YES |
| PGS000364_hmPOS_GRCh37 | 7 | 69257350  | T | C | -0.000281855 | YES |
| PGS000364_hmPOS_GRCh37 | 7 | 71127751  | G | A | -0.000524383 | YES |
| PGS000364_hmPOS_GRCh37 | 7 | 71134745  | A | G | -0.004201309 | YES |
| PGS000364_hmPOS_GRCh37 | 7 | 71153323  | G | C | -0.004262521 | NO  |
| PGS000364_hmPOS_GRCh37 | 7 | 71153438  | T | C | -0.003132214 | YES |
| PGS000364_hmPOS_GRCh37 | 7 | 71155695  | A | G | -0.002345652 | YES |
| PGS000364_hmPOS_GRCh37 | 7 | 71157097  | C | T | -0.004095097 | YES |
| PGS000364_hmPOS_GRCh37 | 7 | 71160137  | G | A | -0.001420993 | YES |
| PGS000364_hmPOS_GRCh37 | 7 | 71178550  | A | C | -0.001949966 | YES |
| PGS000364_hmPOS_GRCh37 | 7 | 71181184  | A | G | -0.001921893 | YES |
| PGS000364_hmPOS_GRCh37 | 7 | 85506052  | A | T | 0.00126407   | NO  |
| PGS000364_hmPOS_GRCh37 | 7 | 85589868  | C | T | 0.009531718  | YES |
| PGS000364_hmPOS_GRCh37 | 7 | 87836113  | A | C | 0.004952083  | YES |
| PGS000364_hmPOS_GRCh37 | 7 | 87844303  | G | A | 0.004751543  | YES |
| PGS000364_hmPOS_GRCh37 | 7 | 87844535  | C | T | 0.004773846  | YES |
| PGS000364_hmPOS_GRCh37 | 7 | 87845378  | T | C | 0.004805859  | YES |
| PGS000364_hmPOS_GRCh37 | 7 | 87978996  | A | G | 0.001834007  | YES |
| PGS000364_hmPOS_GRCh37 | 7 | 87980922  | A | G | 0.002066811  | YES |
| PGS000364_hmPOS_GRCh37 | 7 | 90741500  | G | A | 0.001233388  | YES |
| PGS000364_hmPOS_GRCh37 | 7 | 90746088  | C | A | 0.000269073  | YES |
| PGS000364_hmPOS_GRCh37 | 7 | 90917290  | A | G | 0.001318026  | YES |
| PGS000364_hmPOS_GRCh37 | 7 | 96896364  | C | T | 0.003088228  | YES |
| PGS000364_hmPOS_GRCh37 | 7 | 96896639  | A | G | 0.003123667  | YES |
| PGS000364_hmPOS_GRCh37 | 7 | 96900736  | A | G | 0.002212164  | YES |
| PGS000364_hmPOS_GRCh37 | 7 | 96909380  | G | A | 0.000493607  | YES |
| PGS000364_hmPOS_GRCh37 | 7 | 96911814  | T | G | 0.001506121  | YES |
| PGS000364_hmPOS_GRCh37 | 7 | 96913812  | T | G | 0.002912991  | YES |
| PGS000364_hmPOS_GRCh37 | 7 | 96913813  | C | T | 0.002954018  | YES |
| PGS000364_hmPOS_GRCh37 | 7 | 96916407  | C | T | 0.003166945  | YES |
| PGS000364_hmPOS_GRCh37 | 7 | 96922808  | C | G | 0.002731912  | NO  |
| PGS000364_hmPOS_GRCh37 | 7 | 96923734  | A | G | 0.003678747  | YES |
| PGS000364_hmPOS_GRCh37 | 7 | 101696140 | G | T | 0.00021714   | YES |
| PGS000364_hmPOS_GRCh37 | 7 | 101698583 | T | C | 0.000511761  | YES |
| PGS000364_hmPOS_GRCh37 | 7 | 103778499 | T | C | 0.003316376  | YES |
| PGS000364_hmPOS_GRCh37 | 7 | 103790082 | G | A | 0.003533059  | YES |
| PGS000364_hmPOS_GRCh37 | 7 | 104223762 | G | A | 0.000171536  | YES |
| PGS000364_hmPOS_GRCh37 | 7 | 104223995 | C | T | 0.000184809  | YES |
| PGS000364_hmPOS_GRCh37 | 7 | 104224704 | G | A | 0.000194058  | YES |
| PGS000364_hmPOS_GRCh37 | 7 | 104225738 | G | A | 0.000256918  | YES |
| PGS000364_hmPOS_GRCh37 | 7 | 104227319 | T | A | 0.000192583  | NO  |
| PGS000364_hmPOS_GRCh37 | 7 | 104230525 | G | A | 0.000153945  | YES |
| PGS000364_hmPOS_GRCh37 | 7 | 104231069 | G | A | 6.08505E-05  | YES |
| PGS000364_hmPOS_GRCh37 | 7 | 104233143 | G | C | 1.68548E-05  | NO  |
| PGS000364_hmPOS_GRCh37 | 7 | 104233243 | C | A | 0.000117759  | YES |
| PGS000364_hmPOS_GRCh37 | 7 | 104235361 | G | T | 0.000169155  | YES |
| PGS000364_hmPOS_GRCh37 | 7 | 104236193 | G | A | 0.000159168  | YES |
| PGS000364_hmPOS_GRCh37 | 7 | 104236907 | T | G | 0.000280996  | YES |
| PGS000364_hmPOS_GRCh37 | 7 | 104243848 | C | G | 0.000184504  | NO  |
| PGS000364_hmPOS_GRCh37 | 7 | 104254219 | C | A | 1.50436E-05  | YES |
| PGS000364_hmPOS_GRCh37 | 7 | 104256175 | C | A | 3.5013E-05   | YES |
| PGS000364_hmPOS_GRCh37 | 7 | 104256681 | G | A | 3.24369E-05  | YES |
| PGS000364_hmPOS_GRCh37 | 7 | 104270608 | T | A | 0.003206337  | NO  |
| PGS000364_hmPOS_GRCh37 | 7 | 120921328 | G | A | -0.001051175 | YES |
| PGS000364_hmPOS_GRCh37 | 7 | 130800666 | G | A | 0.005717618  | YES |
| PGS000364_hmPOS_GRCh37 | 7 | 142098460 | T | G | 0.000989681  | YES |
| PGS000364_hmPOS_GRCh37 | 7 | 142099013 | T | C | 0.00152016   | YES |
| PGS000364_hmPOS_GRCh37 | 7 | 142099069 | A | C | 0.000949791  | YES |
| PGS000364_hmPOS_GRCh37 | 7 | 142099988 | G | A | 0.00095102   | YES |

|                        |   |           |   |   |              |     |
|------------------------|---|-----------|---|---|--------------|-----|
| PGS000364_hmPOS_GRCh37 | 7 | 142100535 | A | C | 9.82687E-05  | YES |
| PGS000364_hmPOS_GRCh37 | 7 | 142100784 | C | G | 0.001135691  | NO  |
| PGS000364_hmPOS_GRCh37 | 7 | 142327259 | A | C | 0.008608466  | YES |
| PGS000364_hmPOS_GRCh37 | 7 | 148222226 | C | T | -0.000479147 | YES |
| PGS000364_hmPOS_GRCh37 | 7 | 148226296 | T | C | -1.59162E-05 | YES |
| PGS000364_hmPOS_GRCh37 | 7 | 148227242 | C | T | -0.000194651 | YES |
| PGS000364_hmPOS_GRCh37 | 7 | 148227838 | A | G | -3.46827E-05 | YES |
| PGS000364_hmPOS_GRCh37 | 7 | 148227866 | G | C | -5.95403E-05 | NO  |
| PGS000364_hmPOS_GRCh37 | 7 | 148227961 | T | A | -0.000194092 | NO  |
| PGS000364_hmPOS_GRCh37 | 7 | 148228101 | A | C | -2.06107E-05 | YES |
| PGS000364_hmPOS_GRCh37 | 7 | 148232643 | T | C | -7.67282E-05 | YES |
| PGS000364_hmPOS_GRCh37 | 7 | 148233113 | A | G | -0.000595472 | YES |
| PGS000364_hmPOS_GRCh37 | 7 | 148233221 | C | G | -0.000224717 | NO  |
| PGS000364_hmPOS_GRCh37 | 7 | 148233242 | G | T | -0.000603154 | YES |
| PGS000364_hmPOS_GRCh37 | 7 | 148237744 | C | G | -0.000116118 | NO  |
| PGS000364_hmPOS_GRCh37 | 7 | 148238713 | T | C | -0.000910926 | YES |
| PGS000364_hmPOS_GRCh37 | 7 | 148239599 | C | T | -0.000580714 | YES |
| PGS000364_hmPOS_GRCh37 | 7 | 154936358 | T | C | 0.001046569  | YES |
| PGS000364_hmPOS_GRCh37 | 7 | 154936498 | T | C | 0.011122681  | YES |
| PGS000364_hmPOS_GRCh37 | 7 | 154938461 | T | C | 0.001682776  | YES |
| PGS000364_hmPOS_GRCh37 | 7 | 154941695 | T | G | 0.002843475  | YES |
| PGS000364_hmPOS_GRCh37 | 7 | 154942356 | A | G | 0.001841039  | YES |
| PGS000364_hmPOS_GRCh37 | 7 | 154945975 | G | A | 0.002054707  | YES |
| PGS000364_hmPOS_GRCh37 | 7 | 155271237 | T | A | 0.011885861  | NO  |
| PGS000364_hmPOS_GRCh37 | 7 | 156491132 | T | C | 0.024405766  | YES |
| PGS000364_hmPOS_GRCh37 | 7 | 156496219 | A | G | 0.015947347  | YES |
| PGS000364_hmPOS_GRCh37 | 7 | 156542640 | T | C | 0.020821118  | YES |
| PGS000364_hmPOS_GRCh37 | 7 | 156553970 | T | C | 0.024623763  | YES |
| PGS000364_hmPOS_GRCh37 | 7 | 156568235 | A | G | 0.013247404  | YES |
| PGS000364_hmPOS_GRCh37 | 7 | 156635091 | T | C | 0.02198672   | YES |
| PGS000364_hmPOS_GRCh37 | 8 | 5796901   | T | A | 0.010324372  | NO  |
| PGS000364_hmPOS_GRCh37 | 8 | 5808499   | C | G | 0.011977788  | NO  |
| PGS000364_hmPOS_GRCh37 | 8 | 6013715   | T | C | -0.001127362 | YES |
| PGS000364_hmPOS_GRCh37 | 8 | 18075298  | G | C | 0.001782436  | NO  |
| PGS000364_hmPOS_GRCh37 | 8 | 18082384  | A | G | 0.008249384  | YES |
| PGS000364_hmPOS_GRCh37 | 8 | 18087430  | T | C | 0.004033129  | YES |
| PGS000364_hmPOS_GRCh37 | 8 | 25242721  | C | G | 0.01023425   | NO  |
| PGS000364_hmPOS_GRCh37 | 8 | 26555395  | T | A | -2.12369E-05 | NO  |
| PGS000364_hmPOS_GRCh37 | 8 | 26566229  | G | C | -0.000553499 | NO  |
| PGS000364_hmPOS_GRCh37 | 8 | 74972392  | G | A | 0.022615767  | YES |
| PGS000364_hmPOS_GRCh37 | 8 | 94408811  | G | A | 0.006797133  | YES |
| PGS000364_hmPOS_GRCh37 | 8 | 117166281 | C | T | 0.002816127  | YES |
| PGS000364_hmPOS_GRCh37 | 8 | 119258160 | C | G | 0.003459313  | NO  |
| PGS000364_hmPOS_GRCh37 | 8 | 125685942 | C | G | -0.020248991 | NO  |
| PGS000364_hmPOS_GRCh37 | 8 | 125686407 | T | G | -0.007576784 | YES |
| PGS000364_hmPOS_GRCh37 | 8 | 125687170 | T | C | -0.020323032 | YES |
| PGS000364_hmPOS_GRCh37 | 8 | 125687498 | C | T | -0.019164782 | YES |
| PGS000364_hmPOS_GRCh37 | 8 | 125689659 | C | T | -0.020275728 | YES |
| PGS000364_hmPOS_GRCh37 | 8 | 125691531 | C | T | -0.020314503 | YES |
| PGS000364_hmPOS_GRCh37 | 8 | 125691816 | C | T | -0.021723838 | YES |
| PGS000364_hmPOS_GRCh37 | 8 | 125696512 | A | G | -0.020732889 | YES |
| PGS000364_hmPOS_GRCh37 | 8 | 125697808 | A | T | -0.020267309 | NO  |
| PGS000364_hmPOS_GRCh37 | 8 | 125700089 | A | G | -0.020613197 | YES |
| PGS000364_hmPOS_GRCh37 | 8 | 125700925 | A | G | -0.002110791 | YES |
| PGS000364_hmPOS_GRCh37 | 8 | 125701953 | G | C | -0.021530503 | NO  |
| PGS000364_hmPOS_GRCh37 | 8 | 127698883 | T | C | -0.007164453 | YES |
| PGS000364_hmPOS_GRCh37 | 8 | 127701948 | A | G | -0.006407244 | YES |
| PGS000364_hmPOS_GRCh37 | 8 | 127702342 | A | G | -0.006400117 | YES |
| PGS000364_hmPOS_GRCh37 | 8 | 127705842 | A | G | -0.008367464 | YES |
| PGS000364_hmPOS_GRCh37 | 8 | 134365641 | G | T | 0.007704621  | YES |
| PGS000364_hmPOS_GRCh37 | 8 | 139580731 | G | A | 0.001801848  | YES |
| PGS000364_hmPOS_GRCh37 | 8 | 141544459 | C | G | -0.001720909 | NO  |
| PGS000364_hmPOS_GRCh37 | 8 | 142297429 | T | C | 0.018766937  | YES |

|                        |   |           |   |   |              |     |
|------------------------|---|-----------|---|---|--------------|-----|
| PGS000364_hmPOS_GRCh37 | 8 | 142338289 | T | C | 0.010191228  | YES |
| PGS000364_hmPOS_GRCh37 | 8 | 142370862 | A | G | 0.001631841  | YES |
| PGS000364_hmPOS_GRCh37 | 8 | 142370872 | G | C | 0.001631411  | NO  |
| PGS000364_hmPOS_GRCh37 | 9 | 620438    | G | A | 0.008147877  | YES |
| PGS000364_hmPOS_GRCh37 | 9 | 2226092   | T | C | 0.006727061  | YES |
| PGS000364_hmPOS_GRCh37 | 9 | 4984549   | T | G | -0.00584461  | YES |
| PGS000364_hmPOS_GRCh37 | 9 | 4985879   | G | A | -0.004991199 | YES |
| PGS000364_hmPOS_GRCh37 | 9 | 4991975   | T | C | -0.014375758 | YES |
| PGS000364_hmPOS_GRCh37 | 9 | 4992030   | C | T | -0.014880658 | YES |
| PGS000364_hmPOS_GRCh37 | 9 | 4994052   | C | T | -0.013699947 | YES |
| PGS000364_hmPOS_GRCh37 | 9 | 4994387   | T | G | -0.014218221 | YES |
| PGS000364_hmPOS_GRCh37 | 9 | 4997224   | T | C | -0.013254983 | YES |
| PGS000364_hmPOS_GRCh37 | 9 | 5002188   | A | C | -0.001956069 | YES |
| PGS000364_hmPOS_GRCh37 | 9 | 5003093   | A | G | -0.015653218 | YES |
| PGS000364_hmPOS_GRCh37 | 9 | 5010471   | A | C | -0.006027107 | YES |
| PGS000364_hmPOS_GRCh37 | 9 | 5021529   | T | C | -0.003962651 | YES |
| PGS000364_hmPOS_GRCh37 | 9 | 5021738   | A | G | -0.017194527 | YES |
| PGS000364_hmPOS_GRCh37 | 9 | 5043007   | T | C | -0.004988685 | YES |
| PGS000364_hmPOS_GRCh37 | 9 | 5063199   | A | G | -0.007397396 | YES |
| PGS000364_hmPOS_GRCh37 | 9 | 5065642   | G | A | -0.024060282 | YES |
| PGS000364_hmPOS_GRCh37 | 9 | 5070905   | T | C | -0.001130862 | YES |
| PGS000364_hmPOS_GRCh37 | 9 | 5072846   | A | G | -0.002786033 | YES |
| PGS000364_hmPOS_GRCh37 | 9 | 5090641   | A | G | -0.000685809 | YES |
| PGS000364_hmPOS_GRCh37 | 9 | 5093646   | T | C | -0.001671597 | YES |
| PGS000364_hmPOS_GRCh37 | 9 | 5102190   | G | C | -0.000126303 | NO  |
| PGS000364_hmPOS_GRCh37 | 9 | 5102910   | C | G | -0.001025946 | NO  |
| PGS000364_hmPOS_GRCh37 | 9 | 5103942   | T | C | -0.001004579 | YES |
| PGS000364_hmPOS_GRCh37 | 9 | 5104574   | T | G | -0.001845449 | YES |
| PGS000364_hmPOS_GRCh37 | 9 | 5104640   | A | G | -0.000838364 | YES |
| PGS000364_hmPOS_GRCh37 | 9 | 5105140   | A | G | -0.001782568 | YES |
| PGS000364_hmPOS_GRCh37 | 9 | 5105645   | T | C | -0.000182355 | YES |
| PGS000364_hmPOS_GRCh37 | 9 | 5105651   | C | G | -0.000257603 | NO  |
| PGS000364_hmPOS_GRCh37 | 9 | 5106023   | T | A | -0.000957245 | NO  |
| PGS000364_hmPOS_GRCh37 | 9 | 5109485   | T | G | -0.001229305 | YES |
| PGS000364_hmPOS_GRCh37 | 9 | 5180604   | T | C | -0.000592087 | YES |
| PGS000364_hmPOS_GRCh37 | 9 | 13050293  | A | G | 0.00107647   | YES |
| PGS000364_hmPOS_GRCh37 | 9 | 13051154  | C | G | 0.00311458   | NO  |
| PGS000364_hmPOS_GRCh37 | 9 | 13051193  | C | G | 0.002151697  | NO  |
| PGS000364_hmPOS_GRCh37 | 9 | 13051238  | T | C | 0.002299644  | YES |
| PGS000364_hmPOS_GRCh37 | 9 | 13051712  | T | C | 0.000426139  | YES |
| PGS000364_hmPOS_GRCh37 | 9 | 22829912  | C | T | 0.003026108  | YES |
| PGS000364_hmPOS_GRCh37 | 9 | 22949466  | T | C | 0.000308312  | YES |
| PGS000364_hmPOS_GRCh37 | 9 | 22961293  | T | C | 0.00682079   | YES |
| PGS000364_hmPOS_GRCh37 | 9 | 22961577  | G | T | 0.006949275  | YES |
| PGS000364_hmPOS_GRCh37 | 9 | 23705736  | T | G | -0.004559969 | YES |
| PGS000364_hmPOS_GRCh37 | 9 | 27745826  | A | G | 0.001659986  | YES |
| PGS000364_hmPOS_GRCh37 | 9 | 38631465  | T | C | 0.000165171  | YES |
| PGS000364_hmPOS_GRCh37 | 9 | 38632373  | A | T | 0.00023604   | NO  |
| PGS000364_hmPOS_GRCh37 | 9 | 38633280  | T | C | 0.000603807  | YES |
| PGS000364_hmPOS_GRCh37 | 9 | 38633358  | C | G | 0.000395452  | NO  |
| PGS000364_hmPOS_GRCh37 | 9 | 38633384  | T | C | 0.000958302  | YES |
| PGS000364_hmPOS_GRCh37 | 9 | 38634798  | C | T | 0.000371948  | YES |
| PGS000364_hmPOS_GRCh37 | 9 | 38636168  | A | G | 5.44513E-05  | YES |
| PGS000364_hmPOS_GRCh37 | 9 | 38636183  | T | C | 0.000267632  | YES |
| PGS000364_hmPOS_GRCh37 | 9 | 38636216  | T | C | 6.06183E-05  | YES |
| PGS000364_hmPOS_GRCh37 | 9 | 38636226  | G | C | 0.000117625  | NO  |
| PGS000364_hmPOS_GRCh37 | 9 | 38636331  | T | A | 0.003556251  | NO  |
| PGS000364_hmPOS_GRCh37 | 9 | 38636463  | G | A | 0.003267681  | YES |
| PGS000364_hmPOS_GRCh37 | 9 | 71281591  | A | C | 0.005654291  | YES |
| PGS000364_hmPOS_GRCh37 | 9 | 78431574  | G | A | -6.59282E-05 | YES |
| PGS000364_hmPOS_GRCh37 | 9 | 78432428  | A | G | -0.000508618 | YES |
| PGS000364_hmPOS_GRCh37 | 9 | 78433674  | T | G | -0.000520035 | YES |
| PGS000364_hmPOS_GRCh37 | 9 | 78434101  | G | A | -0.000696165 | YES |

|                        |   |           |   |   |              |     |
|------------------------|---|-----------|---|---|--------------|-----|
| PGS000364_hmPOS_GRCh37 | 9 | 78435049  | C | G | -0.000598533 | NO  |
| PGS000364_hmPOS_GRCh37 | 9 | 78444576  | G | A | -0.000662512 | YES |
| PGS000364_hmPOS_GRCh37 | 9 | 78453563  | T | C | -0.00078924  | YES |
| PGS000364_hmPOS_GRCh37 | 9 | 78453738  | C | G | -0.000762974 | NO  |
| PGS000364_hmPOS_GRCh37 | 9 | 78458756  | T | C | -0.001651028 | YES |
| PGS000364_hmPOS_GRCh37 | 9 | 78460723  | C | T | -0.001184072 | YES |
| PGS000364_hmPOS_GRCh37 | 9 | 78461648  | C | A | -0.001146827 | YES |
| PGS000364_hmPOS_GRCh37 | 9 | 82032456  | T | C | 0.003012151  | YES |
| PGS000364_hmPOS_GRCh37 | 9 | 82041391  | G | A | 0.00021486   | YES |
| PGS000364_hmPOS_GRCh37 | 9 | 82046669  | T | G | 0.000502285  | YES |
| PGS000364_hmPOS_GRCh37 | 9 | 82367951  | T | A | 0.002354333  | NO  |
| PGS000364_hmPOS_GRCh37 | 9 | 82387889  | G | A | 0.010136442  | YES |
| PGS000364_hmPOS_GRCh37 | 9 | 82428904  | A | G | 0.006870416  | NO  |
| PGS000364_hmPOS_GRCh37 | 9 | 91048200  | A | G | 0.001020097  | YES |
| PGS000364_hmPOS_GRCh37 | 9 | 104199126 | A | G | 0.001178546  | YES |
| PGS000364_hmPOS_GRCh37 | 9 | 104226305 | G | C | 0.002070211  | NO  |
| PGS000364_hmPOS_GRCh37 | 9 | 107291731 | A | G | 0.011158086  | YES |
| PGS000364_hmPOS_GRCh37 | 9 | 107291735 | A | T | 0.01117967   | NO  |
| PGS000364_hmPOS_GRCh37 | 9 | 107292001 | C | T | 0.024158587  | YES |
| PGS000364_hmPOS_GRCh37 | 9 | 107292315 | C | T | 0.024579606  | YES |
| PGS000364_hmPOS_GRCh37 | 9 | 107292449 | T | C | 0.024640855  | YES |
| PGS000364_hmPOS_GRCh37 | 9 | 107292576 | G | A | 0.024613145  | YES |
| PGS000364_hmPOS_GRCh37 | 9 | 107292848 | A | G | 0.024597749  | YES |
| PGS000364_hmPOS_GRCh37 | 9 | 107292997 | A | C | 0.024571311  | YES |
| PGS000364_hmPOS_GRCh37 | 9 | 107293126 | A | G | 0.024693114  | YES |
| PGS000364_hmPOS_GRCh37 | 9 | 107293318 | C | T | 0.009564999  | YES |
| PGS000364_hmPOS_GRCh37 | 9 | 107293424 | C | T | 0.009580842  | YES |
| PGS000364_hmPOS_GRCh37 | 9 | 107293507 | A | G | 0.012979241  | YES |
| PGS000364_hmPOS_GRCh37 | 9 | 107294438 | T | C | 0.009932141  | YES |
| PGS000364_hmPOS_GRCh37 | 9 | 107294722 | G | T | 0.014810934  | YES |
| PGS000364_hmPOS_GRCh37 | 9 | 107297371 | A | C | 0.026395892  | YES |
| PGS000364_hmPOS_GRCh37 | 9 | 107337368 | G | A | 0.003638836  | YES |
| PGS000364_hmPOS_GRCh37 | 9 | 107337792 | C | T | 0.003470122  | YES |
| PGS000364_hmPOS_GRCh37 | 9 | 107338202 | C | A | 0.003409132  | YES |
| PGS000364_hmPOS_GRCh37 | 9 | 107339052 | A | T | 0.003255118  | NO  |
| PGS000364_hmPOS_GRCh37 | 9 | 107340851 | A | G | 0.00342648   | YES |
| PGS000364_hmPOS_GRCh37 | 9 | 107340964 | C | T | 0.00342648   | YES |
| PGS000364_hmPOS_GRCh37 | 9 | 107341056 | C | T | 0.00367325   | YES |
| PGS000364_hmPOS_GRCh37 | 9 | 107341313 | T | C | 0.00342296   | YES |
| PGS000364_hmPOS_GRCh37 | 9 | 107341366 | G | A | 0.00342296   | YES |
| PGS000364_hmPOS_GRCh37 | 9 | 107341372 | A | C | 0.00342296   | YES |
| PGS000364_hmPOS_GRCh37 | 9 | 107341636 | A | G | 0.003426335  | YES |
| PGS000364_hmPOS_GRCh37 | 9 | 107341901 | A | T | 0.003426335  | NO  |
| PGS000364_hmPOS_GRCh37 | 9 | 107341978 | G | A | 0.003426335  | YES |
| PGS000364_hmPOS_GRCh37 | 9 | 107342109 | G | A | 0.003425549  | YES |
| PGS000364_hmPOS_GRCh37 | 9 | 107342198 | G | A | 0.003425549  | YES |
| PGS000364_hmPOS_GRCh37 | 9 | 107342240 | A | C | 0.003425869  | YES |
| PGS000364_hmPOS_GRCh37 | 9 | 107342262 | C | A | 0.00342424   | YES |
| PGS000364_hmPOS_GRCh37 | 9 | 107342361 | C | A | 0.003505059  | YES |
| PGS000364_hmPOS_GRCh37 | 9 | 107343079 | T | C | 0.003426015  | YES |
| PGS000364_hmPOS_GRCh37 | 9 | 107344490 | A | G | 0.003423716  | YES |
| PGS000364_hmPOS_GRCh37 | 9 | 107344619 | C | T | 0.002882799  | YES |
| PGS000364_hmPOS_GRCh37 | 9 | 107344866 | T | C | 0.003322434  | YES |
| PGS000364_hmPOS_GRCh37 | 9 | 107344927 | G | A | 0.002936534  | YES |
| PGS000364_hmPOS_GRCh37 | 9 | 107345069 | A | G | 0.00285049   | YES |
| PGS000364_hmPOS_GRCh37 | 9 | 107345119 | T | C | 0.00285049   | YES |
| PGS000364_hmPOS_GRCh37 | 9 | 107345349 | T | C | 0.00285049   | YES |
| PGS000364_hmPOS_GRCh37 | 9 | 107347210 | A | C | 0.003324322  | YES |
| PGS000364_hmPOS_GRCh37 | 9 | 107348346 | A | T | 0.002851388  | NO  |
| PGS000364_hmPOS_GRCh37 | 9 | 107348744 | A | G | 0.002851388  | YES |
| PGS000364_hmPOS_GRCh37 | 9 | 107349598 | A | G | 0.002851388  | YES |
| PGS000364_hmPOS_GRCh37 | 9 | 107349640 | G | A | 0.001323906  | YES |
| PGS000364_hmPOS_GRCh37 | 9 | 107349732 | C | A | 0.002849646  | YES |

|                        |   |           |   |   |             |     |
|------------------------|---|-----------|---|---|-------------|-----|
| PGS000364_hmPOS_GRCh37 | 9 | 107350187 | G | A | 0.003731121 | YES |
| PGS000364_hmPOS_GRCh37 | 9 | 107350211 | C | T | 0.003257832 | YES |
| PGS000364_hmPOS_GRCh37 | 9 | 107350418 | G | A | 0.001718116 | YES |
| PGS000364_hmPOS_GRCh37 | 9 | 107350474 | A | C | 0.001871911 | YES |
| PGS000364_hmPOS_GRCh37 | 9 | 107350544 | G | A | 0.001719491 | YES |
| PGS000364_hmPOS_GRCh37 | 9 | 107350630 | G | A | 0.002197256 | YES |
| PGS000364_hmPOS_GRCh37 | 9 | 107350761 | T | C | 0.001756344 | YES |
| PGS000364_hmPOS_GRCh37 | 9 | 107354089 | A | G | 0.001719883 | YES |
| PGS000364_hmPOS_GRCh37 | 9 | 107354655 | G | T | 0.001719578 | YES |
| PGS000364_hmPOS_GRCh37 | 9 | 107354870 | G | T | 0.001670515 | YES |
| PGS000364_hmPOS_GRCh37 | 9 | 107355655 | G | C | 0.002194538 | NO  |
| PGS000364_hmPOS_GRCh37 | 9 | 107356155 | A | C | 0.001155601 | YES |
| PGS000364_hmPOS_GRCh37 | 9 | 107356689 | C | T | 0.001798553 | YES |
| PGS000364_hmPOS_GRCh37 | 9 | 107357501 | A | C | 0.001718225 | YES |
| PGS000364_hmPOS_GRCh37 | 9 | 107358185 | A | G | 0.000433469 | YES |
| PGS000364_hmPOS_GRCh37 | 9 | 107358222 | C | A | 0.001722699 | YES |
| PGS000364_hmPOS_GRCh37 | 9 | 107358376 | G | C | 0.002190264 | NO  |
| PGS000364_hmPOS_GRCh37 | 9 | 107358806 | T | C | 0.001721498 | YES |
| PGS000364_hmPOS_GRCh37 | 9 | 107358983 | A | T | 0.002190264 | NO  |
| PGS000364_hmPOS_GRCh37 | 9 | 107359427 | G | C | 0.001721476 | NO  |
| PGS000364_hmPOS_GRCh37 | 9 | 107359547 | G | A | 0.002203286 | YES |
| PGS000364_hmPOS_GRCh37 | 9 | 107359802 | C | A | 0.001755686 | YES |
| PGS000364_hmPOS_GRCh37 | 9 | 107360014 | G | A | 0.001721498 | YES |
| PGS000364_hmPOS_GRCh37 | 9 | 107360171 | A | G | 0.001721498 | YES |
| PGS000364_hmPOS_GRCh37 | 9 | 107360373 | T | C | 0.002203357 | YES |
| PGS000364_hmPOS_GRCh37 | 9 | 107360396 | G | A | 0.001721498 | YES |
| PGS000364_hmPOS_GRCh37 | 9 | 107360826 | G | A | 0.000451091 | YES |
| PGS000364_hmPOS_GRCh37 | 9 | 107360851 | C | T | 0.001483258 | YES |
| PGS000364_hmPOS_GRCh37 | 9 | 107361129 | T | C | 0.00205653  | YES |
| PGS000364_hmPOS_GRCh37 | 9 | 107361599 | C | G | 0.003384779 | NO  |
| PGS000364_hmPOS_GRCh37 | 9 | 107361710 | A | G | 0.001550266 | YES |
| PGS000364_hmPOS_GRCh37 | 9 | 107362004 | G | A | 0.001911881 | YES |
| PGS000364_hmPOS_GRCh37 | 9 | 107362114 | C | A | 0.001236185 | YES |
| PGS000364_hmPOS_GRCh37 | 9 | 107362302 | A | C | 0.001910845 | YES |
| PGS000364_hmPOS_GRCh37 | 9 | 107362735 | C | T | 0.001885758 | YES |
| PGS000364_hmPOS_GRCh37 | 9 | 107362820 | G | A | 0.00188845  | YES |
| PGS000364_hmPOS_GRCh37 | 9 | 107363266 | A | C | 0.003776828 | YES |
| PGS000364_hmPOS_GRCh37 | 9 | 107363738 | C | T | 0.003994639 | YES |
| PGS000364_hmPOS_GRCh37 | 9 | 107363777 | C | T | 0.003733851 | YES |
| PGS000364_hmPOS_GRCh37 | 9 | 107363792 | A | G | 0.004028513 | YES |
| PGS000364_hmPOS_GRCh37 | 9 | 107363808 | C | A | 0.003706493 | YES |
| PGS000364_hmPOS_GRCh37 | 9 | 107363850 | A | G | 0.002504542 | YES |
| PGS000364_hmPOS_GRCh37 | 9 | 107364027 | C | T | 0.002160851 | YES |
| PGS000364_hmPOS_GRCh37 | 9 | 107364421 | A | G | 0.001885848 | YES |
| PGS000364_hmPOS_GRCh37 | 9 | 107364924 | C | T | 0.001881677 | YES |
| PGS000364_hmPOS_GRCh37 | 9 | 107365325 | A | C | 0.00216353  | YES |
| PGS000364_hmPOS_GRCh37 | 9 | 107366471 | A | G | 0.001877016 | YES |
| PGS000364_hmPOS_GRCh37 | 9 | 107366884 | G | C | 0.002161415 | NO  |
| PGS000364_hmPOS_GRCh37 | 9 | 107367008 | C | T | 0.001876837 | YES |
| PGS000364_hmPOS_GRCh37 | 9 | 107367841 | T | A | 0.000252346 | NO  |
| PGS000364_hmPOS_GRCh37 | 9 | 107368257 | G | A | 0.001716023 | YES |
| PGS000364_hmPOS_GRCh37 | 9 | 107368368 | T | C | 0.001713385 | YES |
| PGS000364_hmPOS_GRCh37 | 9 | 107368682 | G | A | 0.001713058 | YES |
| PGS000364_hmPOS_GRCh37 | 9 | 107369564 | C | T | 0.000193668 | YES |
| PGS000364_hmPOS_GRCh37 | 9 | 107370792 | A | G | 0.000236706 | YES |
| PGS000364_hmPOS_GRCh37 | 9 | 107371359 | T | C | 0.000251251 | YES |
| PGS000364_hmPOS_GRCh37 | 9 | 107372721 | A | G | 0.000937268 | YES |
| PGS000364_hmPOS_GRCh37 | 9 | 107374371 | A | C | 0.000266808 | YES |
| PGS000364_hmPOS_GRCh37 | 9 | 107378964 | G | C | 0.00025488  | NO  |
| PGS000364_hmPOS_GRCh37 | 9 | 107380215 | A | T | 0.00025488  | NO  |
| PGS000364_hmPOS_GRCh37 | 9 | 107395750 | G | C | 0.001577903 | NO  |
| PGS000364_hmPOS_GRCh37 | 9 | 107395947 | G | C | 0.003920377 | NO  |
| PGS000364_hmPOS_GRCh37 | 9 | 107398743 | G | A | 0.004757614 | YES |

|                        |    |           |   |   |              |     |
|------------------------|----|-----------|---|---|--------------|-----|
| PGS000364_hmPOS_GRCh37 | 9  | 107401447 | C | T | 0.004421406  | YES |
| PGS000364_hmPOS_GRCh37 | 9  | 107402481 | C | T | 0.00442517   | YES |
| PGS000364_hmPOS_GRCh37 | 9  | 107409898 | A | G | 0.000769325  | YES |
| PGS000364_hmPOS_GRCh37 | 9  | 107424198 | A | G | 0.003849522  | YES |
| PGS000364_hmPOS_GRCh37 | 9  | 107430962 | A | T | 0.004535587  | NO  |
| PGS000364_hmPOS_GRCh37 | 9  | 109218627 | T | C | 0.014888049  | YES |
| PGS000364_hmPOS_GRCh37 | 9  | 109218799 | C | T | 0.015509279  | YES |
| PGS000364_hmPOS_GRCh37 | 9  | 109243327 | C | A | 0.009330084  | YES |
| PGS000364_hmPOS_GRCh37 | 9  | 109244902 | C | T | 0.010244863  | YES |
| PGS000364_hmPOS_GRCh37 | 9  | 109254458 | C | T | 0.004131829  | YES |
| PGS000364_hmPOS_GRCh37 | 9  | 116820024 | A | G | -0.002827682 | YES |
| PGS000364_hmPOS_GRCh37 | 9  | 131575934 | A | G | 0.002324245  | YES |
| PGS000364_hmPOS_GRCh37 | 9  | 131599032 | A | G | 0.003491006  | YES |
| PGS000364_hmPOS_GRCh37 | 9  | 131620132 | G | A | 0.008668483  | YES |
| PGS000364_hmPOS_GRCh37 | 9  | 131639867 | G | C | 0.010488197  | NO  |
| PGS000364_hmPOS_GRCh37 | 9  | 131726683 | G | C | 0.009190778  | NO  |
| PGS000364_hmPOS_GRCh37 | 9  | 135908157 | T | A | 0.000112721  | NO  |
| PGS000364_hmPOS_GRCh37 | 9  | 135909790 | G | T | 0.004012726  | YES |
| PGS000364_hmPOS_GRCh37 | 9  | 135909850 | C | A | 0.003864371  | YES |
| PGS000364_hmPOS_GRCh37 | 9  | 135910328 | C | T | 0.004018392  | YES |
| PGS000364_hmPOS_GRCh37 | 9  | 135912230 | C | T | 0.004009477  | YES |
| PGS000364_hmPOS_GRCh37 | 9  | 135913740 | G | C | 0.004000383  | NO  |
| PGS000364_hmPOS_GRCh37 | 9  | 135914998 | C | T | 0.000977596  | YES |
| PGS000364_hmPOS_GRCh37 | 9  | 135925115 | C | T | 0.001047486  | YES |
| PGS000364_hmPOS_GRCh37 | 9  | 135926017 | G | A | 0.00074877   | YES |
| PGS000364_hmPOS_GRCh37 | 9  | 135926993 | G | A | 0.001270768  | YES |
| PGS000364_hmPOS_GRCh37 | 9  | 135929200 | C | A | 0.002653701  | YES |
| PGS000364_hmPOS_GRCh37 | 10 | 618486    | C | T | 0.000945876  | YES |
| PGS000364_hmPOS_GRCh37 | 10 | 625356    | A | G | 0.004404308  | YES |
| PGS000364_hmPOS_GRCh37 | 10 | 1340851   | G | C | 0.001439205  | NO  |
| PGS000364_hmPOS_GRCh37 | 10 | 3485839   | A | G | 0.004645892  | YES |
| PGS000364_hmPOS_GRCh37 | 10 | 3494886   | T | G | 0.009731989  | YES |
| PGS000364_hmPOS_GRCh37 | 10 | 4670108   | T | C | 0.00192869   | YES |
| PGS000364_hmPOS_GRCh37 | 10 | 4670216   | G | C | 0.001288408  | NO  |
| PGS000364_hmPOS_GRCh37 | 10 | 4672693   | T | C | 0.001520055  | YES |
| PGS000364_hmPOS_GRCh37 | 10 | 4672895   | T | C | 0.001847209  | YES |
| PGS000364_hmPOS_GRCh37 | 10 | 4673718   | G | A | 0.00094486   | YES |
| PGS000364_hmPOS_GRCh37 | 10 | 4674439   | C | A | 0.001362142  | YES |
| PGS000364_hmPOS_GRCh37 | 10 | 9972004   | T | C | 0.004282946  | YES |
| PGS000364_hmPOS_GRCh37 | 10 | 10027790  | T | C | 0.002961515  | YES |
| PGS000364_hmPOS_GRCh37 | 10 | 20179266  | G | A | 0.002028918  | YES |
| PGS000364_hmPOS_GRCh37 | 10 | 20180184  | C | A | 0.003164773  | YES |
| PGS000364_hmPOS_GRCh37 | 10 | 20202914  | T | A | 0.003127233  | NO  |
| PGS000364_hmPOS_GRCh37 | 10 | 20203534  | T | C | 0.002885214  | YES |
| PGS000364_hmPOS_GRCh37 | 10 | 20206184  | A | G | 0.006283648  | YES |
| PGS000364_hmPOS_GRCh37 | 10 | 31740828  | T | C | 0.001690631  | YES |
| PGS000364_hmPOS_GRCh37 | 10 | 31755375  | T | C | 0.003804797  | YES |
| PGS000364_hmPOS_GRCh37 | 10 | 31769469  | G | A | 0.003835147  | YES |
| PGS000364_hmPOS_GRCh37 | 10 | 31820655  | C | A | 0.004583283  | YES |
| PGS000364_hmPOS_GRCh37 | 10 | 31823443  | A | G | 0.004473249  | YES |
| PGS000364_hmPOS_GRCh37 | 10 | 31841318  | C | T | 0.003545341  | YES |
| PGS000364_hmPOS_GRCh37 | 10 | 33854166  | T | C | -0.003979807 | YES |
| PGS000364_hmPOS_GRCh37 | 10 | 33856151  | A | G | -0.000197687 | YES |
| PGS000364_hmPOS_GRCh37 | 10 | 59290336  | A | G | 0.006506593  | YES |
| PGS000364_hmPOS_GRCh37 | 10 | 60145079  | G | A | 0.011374575  | YES |
| PGS000364_hmPOS_GRCh37 | 10 | 60147270  | A | G | 0.007018813  | YES |
| PGS000364_hmPOS_GRCh37 | 10 | 60147784  | A | G | 0.006885833  | YES |
| PGS000364_hmPOS_GRCh37 | 10 | 60148692  | G | A | 0.006754995  | YES |
| PGS000364_hmPOS_GRCh37 | 10 | 60151026  | G | A | 0.006513557  | YES |
| PGS000364_hmPOS_GRCh37 | 10 | 60156584  | A | G | 0.006020852  | YES |
| PGS000364_hmPOS_GRCh37 | 10 | 60157339  | T | C | 0.005963829  | YES |
| PGS000364_hmPOS_GRCh37 | 10 | 60161172  | A | G | 0.007943364  | YES |
| PGS000364_hmPOS_GRCh37 | 10 | 60161640  | G | A | 0.008166484  | YES |

|                        |    |          |   |   |              |     |
|------------------------|----|----------|---|---|--------------|-----|
| PGS000364_hmPOS_GRCh37 | 10 | 60167882 | T | C | 0.001368374  | YES |
| PGS000364_hmPOS_GRCh37 | 10 | 60168003 | A | G | 0.000199434  | YES |
| PGS000364_hmPOS_GRCh37 | 10 | 60169880 | T | G | 0.004605443  | YES |
| PGS000364_hmPOS_GRCh37 | 10 | 60219560 | A | G | -0.007245987 | YES |
| PGS000364_hmPOS_GRCh37 | 10 | 60588885 | C | A | 0.002954394  | YES |
| PGS000364_hmPOS_GRCh37 | 10 | 62572565 | A | G | 0.002259241  | YES |
| PGS000364_hmPOS_GRCh37 | 10 | 64671764 | A | G | -0.007353113 | YES |
| PGS000364_hmPOS_GRCh37 | 10 | 64743728 | T | C | -0.002512661 | YES |
| PGS000364_hmPOS_GRCh37 | 10 | 64745058 | A | T | -0.005441522 | NO  |
| PGS000364_hmPOS_GRCh37 | 10 | 64745059 | A | T | -0.005442058 | NO  |
| PGS000364_hmPOS_GRCh37 | 10 | 64745589 | C | T | -0.005930858 | YES |
| PGS000364_hmPOS_GRCh37 | 10 | 64753309 | A | T | -0.004275905 | NO  |
| PGS000364_hmPOS_GRCh37 | 10 | 64754145 | G | T | -0.005472189 | YES |
| PGS000364_hmPOS_GRCh37 | 10 | 64757342 | C | T | -0.002318791 | YES |
| PGS000364_hmPOS_GRCh37 | 10 | 67786957 | C | T | 0.015625872  | YES |
| PGS000364_hmPOS_GRCh37 | 10 | 67794066 | C | T | 0.014488255  | YES |
| PGS000364_hmPOS_GRCh37 | 10 | 67797918 | T | C | 0.011300528  | YES |
| PGS000364_hmPOS_GRCh37 | 10 | 67804202 | A | C | 0.011068127  | YES |
| PGS000364_hmPOS_GRCh37 | 10 | 67806009 | T | G | 0.011404333  | YES |
| PGS000364_hmPOS_GRCh37 | 10 | 67806210 | C | T | 0.009358671  | YES |
| PGS000364_hmPOS_GRCh37 | 10 | 67806844 | A | T | 0.010637079  | NO  |
| PGS000364_hmPOS_GRCh37 | 10 | 67807756 | A | T | 0.010583107  | NO  |
| PGS000364_hmPOS_GRCh37 | 10 | 67809091 | C | T | 0.010542804  | YES |
| PGS000364_hmPOS_GRCh37 | 10 | 67809536 | G | A | 0.010489876  | YES |
| PGS000364_hmPOS_GRCh37 | 10 | 67809646 | A | G | 0.010474481  | YES |
| PGS000364_hmPOS_GRCh37 | 10 | 67810031 | G | A | 0.009133771  | YES |
| PGS000364_hmPOS_GRCh37 | 10 | 67810251 | C | T | 0.009837251  | YES |
| PGS000364_hmPOS_GRCh37 | 10 | 67810327 | T | C | 0.009823992  | YES |
| PGS000364_hmPOS_GRCh37 | 10 | 67810493 | G | A | 0.009832625  | YES |
| PGS000364_hmPOS_GRCh37 | 10 | 67812643 | T | C | 0.010994217  | YES |
| PGS000364_hmPOS_GRCh37 | 10 | 67813956 | C | A | 0.009902462  | YES |
| PGS000364_hmPOS_GRCh37 | 10 | 67814548 | C | A | 0.009521948  | YES |
| PGS000364_hmPOS_GRCh37 | 10 | 67815753 | T | C | 0.009518841  | YES |
| PGS000364_hmPOS_GRCh37 | 10 | 67815927 | C | T | 0.009570785  | YES |
| PGS000364_hmPOS_GRCh37 | 10 | 67816170 | A | G | 0.009777486  | YES |
| PGS000364_hmPOS_GRCh37 | 10 | 67818765 | G | A | 0.009422381  | YES |
| PGS000364_hmPOS_GRCh37 | 10 | 67818958 | C | T | 0.00954454   | YES |
| PGS000364_hmPOS_GRCh37 | 10 | 67820224 | T | A | 0.009434282  | NO  |
| PGS000364_hmPOS_GRCh37 | 10 | 67820766 | G | A | 0.009376909  | YES |
| PGS000364_hmPOS_GRCh37 | 10 | 67821207 | A | G | 0.009380804  | YES |
| PGS000364_hmPOS_GRCh37 | 10 | 67821634 | C | A | 0.009374416  | YES |
| PGS000364_hmPOS_GRCh37 | 10 | 67822758 | A | T | 0.009300635  | NO  |
| PGS000364_hmPOS_GRCh37 | 10 | 67822926 | T | C | 0.009390483  | YES |
| PGS000364_hmPOS_GRCh37 | 10 | 67826749 | A | G | 0.009359244  | YES |
| PGS000364_hmPOS_GRCh37 | 10 | 67831067 | C | G | 0.009479379  | NO  |
| PGS000364_hmPOS_GRCh37 | 10 | 67832274 | T | C | 0.009601317  | YES |
| PGS000364_hmPOS_GRCh37 | 10 | 67833198 | G | A | 0.007909799  | YES |
| PGS000364_hmPOS_GRCh37 | 10 | 67835039 | C | A | 0.007998414  | YES |
| PGS000364_hmPOS_GRCh37 | 10 | 67835117 | C | T | 0.008184812  | YES |
| PGS000364_hmPOS_GRCh37 | 10 | 67835356 | C | T | 0.008178721  | YES |
| PGS000364_hmPOS_GRCh37 | 10 | 67835750 | A | T | 0.008001406  | NO  |
| PGS000364_hmPOS_GRCh37 | 10 | 67837187 | A | C | 0.008079661  | YES |
| PGS000364_hmPOS_GRCh37 | 10 | 67838194 | C | T | 0.008017932  | YES |
| PGS000364_hmPOS_GRCh37 | 10 | 67838899 | G | A | 0.007970569  | YES |
| PGS000364_hmPOS_GRCh37 | 10 | 67852050 | C | T | 0.000156236  | YES |
| PGS000364_hmPOS_GRCh37 | 10 | 67853279 | G | A | 0.002292699  | YES |
| PGS000364_hmPOS_GRCh37 | 10 | 67853610 | C | A | 0.002529409  | YES |
| PGS000364_hmPOS_GRCh37 | 10 | 67854376 | G | A | 0.002103086  | YES |
| PGS000364_hmPOS_GRCh37 | 10 | 67855521 | C | T | 0.002070813  | YES |
| PGS000364_hmPOS_GRCh37 | 10 | 67863801 | G | A | 0.002101481  | YES |
| PGS000364_hmPOS_GRCh37 | 10 | 67864181 | C | T | 0.00178965   | YES |
| PGS000364_hmPOS_GRCh37 | 10 | 67871841 | A | G | 0.000915773  | YES |
| PGS000364_hmPOS_GRCh37 | 10 | 67873775 | A | G | 0.000786792  | YES |

|                        |    |           |   |   |                     |     |
|------------------------|----|-----------|---|---|---------------------|-----|
| PGS000364_hmPOS_GRCh37 | 10 | 67876471  | A | G | 0.000758974         | YES |
| PGS000364_hmPOS_GRCh37 | 10 | 67876596  | A | G | 0.000779676         | YES |
| PGS000364_hmPOS_GRCh37 | 10 | 77971481  | G | A | 0.000416637         | YES |
| PGS000364_hmPOS_GRCh37 | 10 | 78116099  | T | G | 0.002646686         | YES |
| PGS000364_hmPOS_GRCh37 | 10 | 82241838  | A | G | 0.001970863         | YES |
| PGS000364_hmPOS_GRCh37 | 10 | 87767732  | T | A | 0.01104214          | NO  |
| PGS000364_hmPOS_GRCh37 | 10 | 90449236  | A | G | 0.001706153         | YES |
| PGS000364_hmPOS_GRCh37 | 10 | 108388923 | C | T | 0.002882401         | YES |
| PGS000364_hmPOS_GRCh37 | 10 | 112225713 | C | T | 0.004883423         | YES |
| PGS000364_hmPOS_GRCh37 | 10 | 122296627 | T | A | -0.002576989        | NO  |
| PGS000364_hmPOS_GRCh37 | 10 | 122311938 | G | T | -0.00141452         | YES |
| PGS000364_hmPOS_GRCh37 | 10 | 122311974 | A | T | -0.001067753        | NO  |
| PGS000364_hmPOS_GRCh37 | 10 | 122325454 | G | A | 0.003360585         | YES |
| PGS000364_hmPOS_GRCh37 | 10 | 122339342 | A | G | -0.003166583        | YES |
| PGS000364_hmPOS_GRCh37 | 10 | 122339357 | C | T | -0.002380162        | YES |
| PGS000364_hmPOS_GRCh37 | 10 | 123547144 | C | T | 0.023290963         | YES |
| PGS000364_hmPOS_GRCh37 | 10 | 123692726 | A | T | 4.30125E-05         | NO  |
| PGS000364_hmPOS_GRCh37 | 10 | 129439607 | T | G | 0.001186627         | YES |
| PGS000364_hmPOS_GRCh37 | 10 | 132134542 | G | C | 0.002473511         | NO  |
| PGS000364_hmPOS_GRCh37 | 11 | 890866    | A | G | 0.003540354         | YES |
| PGS000364_hmPOS_GRCh37 | 11 | 11215989  | C | T | 0.004051628         | YES |
| PGS000364_hmPOS_GRCh37 | 11 | 17589129  | A | C | 0.004158855         | YES |
| PGS000364_hmPOS_GRCh37 | 11 | 17597822  | T | C | 0.002423018         | YES |
| PGS000364_hmPOS_GRCh37 | 11 | 17599093  | C | T | 2.93932258838003e-7 | YES |
| PGS000364_hmPOS_GRCh37 | 11 | 17657888  | T | C | 0.002317512         | YES |
| PGS000364_hmPOS_GRCh37 | 11 | 18193107  | T | C | 0.000310108         | YES |
| PGS000364_hmPOS_GRCh37 | 11 | 18210849  | T | C | 0.000594349         | YES |
| PGS000364_hmPOS_GRCh37 | 11 | 36432830  | G | T | 0.002314209         | YES |
| PGS000364_hmPOS_GRCh37 | 11 | 36434542  | A | G | 0.00031839          | YES |
| PGS000364_hmPOS_GRCh37 | 11 | 36437164  | T | C | 0.000416813         | YES |
| PGS000364_hmPOS_GRCh37 | 11 | 36437868  | G | T | 0.006490954         | YES |
| PGS000364_hmPOS_GRCh37 | 11 | 37397873  | G | A | 0.013021324         | YES |
| PGS000364_hmPOS_GRCh37 | 11 | 40143344  | A | G | 3.88296E-05         | YES |
| PGS000364_hmPOS_GRCh37 | 11 | 40143958  | C | T | 0.001665043         | YES |
| PGS000364_hmPOS_GRCh37 | 11 | 40146249  | A | G | 0.004065151         | YES |
| PGS000364_hmPOS_GRCh37 | 11 | 40146979  | A | C | 0.002208067         | YES |
| PGS000364_hmPOS_GRCh37 | 11 | 40147836  | G | A | 0.000317058         | YES |
| PGS000364_hmPOS_GRCh37 | 11 | 60515110  | G | C | 0.002054569         | NO  |
| PGS000364_hmPOS_GRCh37 | 11 | 60515320  | G | A | 0.001022156         | YES |
| PGS000364_hmPOS_GRCh37 | 11 | 70386369  | G | A | 0.023070916         | YES |
| PGS000364_hmPOS_GRCh37 | 11 | 70387342  | C | G | 0.007739648         | NO  |
| PGS000364_hmPOS_GRCh37 | 11 | 70390284  | G | A | 0.007604408         | YES |
| PGS000364_hmPOS_GRCh37 | 11 | 70390462  | A | G | 0.008016401         | YES |
| PGS000364_hmPOS_GRCh37 | 11 | 70390719  | G | A | 0.007784219         | YES |
| PGS000364_hmPOS_GRCh37 | 11 | 78425906  | T | C | 0.000856069         | YES |
| PGS000364_hmPOS_GRCh37 | 11 | 83055365  | A | G | -0.003529562        | YES |
| PGS000364_hmPOS_GRCh37 | 11 | 84663249  | C | T | 0.000551216         | YES |
| PGS000364_hmPOS_GRCh37 | 11 | 84695711  | C | T | 0.004788359         | YES |
| PGS000364_hmPOS_GRCh37 | 11 | 84736164  | A | G | 0.008575508         | YES |
| PGS000364_hmPOS_GRCh37 | 11 | 84782539  | G | A | 0.001711554         | YES |
| PGS000364_hmPOS_GRCh37 | 11 | 84811390  | G | A | 0.00317246          | YES |
| PGS000364_hmPOS_GRCh37 | 11 | 84845925  | A | G | 0.006999928         | YES |
| PGS000364_hmPOS_GRCh37 | 11 | 84856250  | T | C | 0.006903595         | YES |
| PGS000364_hmPOS_GRCh37 | 11 | 84861343  | T | C | 0.002424295         | YES |
| PGS000364_hmPOS_GRCh37 | 11 | 84872234  | G | T | 0.017908856         | YES |
| PGS000364_hmPOS_GRCh37 | 11 | 84878532  | C | T | 0.008370636         | YES |
| PGS000364_hmPOS_GRCh37 | 11 | 84883931  | C | T | 0.009670522         | YES |
| PGS000364_hmPOS_GRCh37 | 11 | 84899827  | C | T | 0.002571498         | YES |
| PGS000364_hmPOS_GRCh37 | 11 | 84903637  | T | C | 0.005081453         | YES |
| PGS000364_hmPOS_GRCh37 | 11 | 84904742  | C | T | 0.002001867         | YES |
| PGS000364_hmPOS_GRCh37 | 11 | 84904818  | T | G | 0.002452823         | YES |
| PGS000364_hmPOS_GRCh37 | 11 | 85057399  | T | A | 0.004506751         | NO  |
| PGS000364_hmPOS_GRCh37 | 11 | 85122449  | A | G | 0.000814569         | YES |



|                        |    |           |   |   |                     |     |
|------------------------|----|-----------|---|---|---------------------|-----|
| PGS000364_hmPOS_GRCh37 | 11 | 85159102  | G | A | 5.60103228086639e-6 | YES |
| PGS000364_hmPOS_GRCh37 | 11 | 85227439  | G | A | 0.004777737         | YES |
| PGS000364_hmPOS_GRCh37 | 11 | 85227751  | C | T | 0.000509368         | YES |
| PGS000364_hmPOS_GRCh37 | 11 | 85228358  | G | A | 0.003167696         | YES |
| PGS000364_hmPOS_GRCh37 | 11 | 85229456  | C | A | 0.003668395         | YES |
| PGS000364_hmPOS_GRCh37 | 11 | 85230491  | T | C | 0.00308908          | YES |
| PGS000364_hmPOS_GRCh37 | 11 | 85231475  | A | G | 0.004650775         | YES |
| PGS000364_hmPOS_GRCh37 | 11 | 85231961  | G | A | 0.004655878         | YES |
| PGS000364_hmPOS_GRCh37 | 11 | 85232508  | A | G | 0.000362739         | YES |
| PGS000364_hmPOS_GRCh37 | 11 | 85232636  | G | A | 0.004655734         | YES |
| PGS000364_hmPOS_GRCh37 | 11 | 85233493  | A | C | 0.003474199         | YES |
| PGS000364_hmPOS_GRCh37 | 11 | 85236332  | A | G | 0.004661021         | YES |
| PGS000364_hmPOS_GRCh37 | 11 | 85237627  | A | C | 0.00347731          | YES |
| PGS000364_hmPOS_GRCh37 | 11 | 85238368  | T | G | 0.001924128         | YES |
| PGS000364_hmPOS_GRCh37 | 11 | 85238677  | A | T | 0.001956568         | NO  |
| PGS000364_hmPOS_GRCh37 | 11 | 85238886  | G | A | 0.000319446         | YES |
| PGS000364_hmPOS_GRCh37 | 11 | 85238901  | A | G | 0.003418018         | YES |
| PGS000364_hmPOS_GRCh37 | 11 | 85239189  | A | T | 0.001912512         | NO  |
| PGS000364_hmPOS_GRCh37 | 11 | 85239290  | C | T | 0.001912242         | YES |
| PGS000364_hmPOS_GRCh37 | 11 | 85239562  | T | A | 0.003487947         | NO  |
| PGS000364_hmPOS_GRCh37 | 11 | 85239988  | A | C | 0.003488329         | YES |
| PGS000364_hmPOS_GRCh37 | 11 | 85240145  | A | G | 0.003509249         | YES |
| PGS000364_hmPOS_GRCh37 | 11 | 85241143  | T | C | 0.002047627         | YES |
| PGS000364_hmPOS_GRCh37 | 11 | 85243213  | G | A | 0.004288071         | YES |
| PGS000364_hmPOS_GRCh37 | 11 | 85244314  | T | C | 0.00137661          | YES |
| PGS000364_hmPOS_GRCh37 | 11 | 85245151  | C | T | 0.002447225         | YES |
| PGS000364_hmPOS_GRCh37 | 11 | 85245772  | A | G | 0.000969751         | YES |
| PGS000364_hmPOS_GRCh37 | 11 | 85247973  | A | G | 1.72006E-05         | YES |
| PGS000364_hmPOS_GRCh37 | 11 | 85248141  | T | C | 6.15994217040283e-6 | YES |
| PGS000364_hmPOS_GRCh37 | 11 | 85255186  | T | G | 0.001393923         | YES |
| PGS000364_hmPOS_GRCh37 | 11 | 85255613  | T | A | 8.88635E-05         | NO  |
| PGS000364_hmPOS_GRCh37 | 11 | 85255842  | T | C | 0.000953997         | YES |
| PGS000364_hmPOS_GRCh37 | 11 | 85260059  | A | G | 0.001523136         | YES |
| PGS000364_hmPOS_GRCh37 | 11 | 85260220  | C | T | 0.003088338         | YES |
| PGS000364_hmPOS_GRCh37 | 11 | 85267366  | G | A | 0.001194719         | YES |
| PGS000364_hmPOS_GRCh37 | 11 | 85284406  | A | T | 0.005242753         | NO  |
| PGS000364_hmPOS_GRCh37 | 11 | 85287944  | G | A | 0.006307931         | YES |
| PGS000364_hmPOS_GRCh37 | 11 | 85295227  | G | C | 0.001628896         | NO  |
| PGS000364_hmPOS_GRCh37 | 11 | 92558024  | T | C | -0.001335069        | YES |
| PGS000364_hmPOS_GRCh37 | 11 | 92558342  | A | G | -0.000765637        | YES |
| PGS000364_hmPOS_GRCh37 | 11 | 93080928  | T | C | 0.011643446         | YES |
| PGS000364_hmPOS_GRCh37 | 11 | 93087365  | A | G | 0.006197936         | YES |
| PGS000364_hmPOS_GRCh37 | 11 | 93087780  | C | A | 0.005963016         | YES |
| PGS000364_hmPOS_GRCh37 | 11 | 93090608  | A | T | 0.010868575         | NO  |
| PGS000364_hmPOS_GRCh37 | 11 | 93096055  | C | T | 0.011254422         | YES |
| PGS000364_hmPOS_GRCh37 | 11 | 93097210  | G | C | 0.002483969         | NO  |
| PGS000364_hmPOS_GRCh37 | 11 | 93105965  | C | T | 0.002488212         | YES |
| PGS000364_hmPOS_GRCh37 | 11 | 93106593  | C | A | 0.002498845         | YES |
| PGS000364_hmPOS_GRCh37 | 11 | 93107458  | G | A | 0.002441484         | YES |
| PGS000364_hmPOS_GRCh37 | 11 | 93108546  | A | G | 0.002406397         | YES |
| PGS000364_hmPOS_GRCh37 | 11 | 93112727  | C | G | 0.002568126         | NO  |
| PGS000364_hmPOS_GRCh37 | 11 | 93114521  | A | G | 0.002382307         | YES |
| PGS000364_hmPOS_GRCh37 | 11 | 93131667  | A | C | 0.014184779         | YES |
| PGS000364_hmPOS_GRCh37 | 11 | 93134216  | G | A | 0.014348322         | YES |
| PGS000364_hmPOS_GRCh37 | 11 | 93140251  | A | T | 0.003486006         | NO  |
| PGS000364_hmPOS_GRCh37 | 11 | 93140593  | A | G | 0.003423164         | YES |
| PGS000364_hmPOS_GRCh37 | 11 | 93140986  | G | T | 0.003506593         | YES |
| PGS000364_hmPOS_GRCh37 | 11 | 102586758 | T | C | 0.002423902         | YES |
| PGS000364_hmPOS_GRCh37 | 11 | 102588331 | G | A | 0.002322265         | YES |
| PGS000364_hmPOS_GRCh37 | 11 | 102588479 | A | C | 0.002359942         | YES |
| PGS000364_hmPOS_GRCh37 | 11 | 102588552 | C | T | 0.002360646         | YES |
| PGS000364_hmPOS_GRCh37 | 11 | 102588607 | A | G | 0.002357368         | YES |
| PGS000364_hmPOS_GRCh37 | 11 | 102589642 | T | C | 0.002397834         | YES |

|                        |    |           |   |   |              |     |
|------------------------|----|-----------|---|---|--------------|-----|
| PGS000364_hmPOS_GRCh37 | 11 | 102592854 | A | G | 0.002391824  | YES |
| PGS000364_hmPOS_GRCh37 | 11 | 102595258 | A | G | 0.002383429  | YES |
| PGS000364_hmPOS_GRCh37 | 11 | 102595388 | C | A | 0.0029483    | YES |
| PGS000364_hmPOS_GRCh37 | 11 | 102595408 | G | A | 0.0029483    | YES |
| PGS000364_hmPOS_GRCh37 | 11 | 102596583 | C | G | 0.00238043   | NO  |
| PGS000364_hmPOS_GRCh37 | 11 | 102600377 | T | C | 0.003042633  | YES |
| PGS000364_hmPOS_GRCh37 | 11 | 102605880 | C | T | 0.024584442  | YES |
| PGS000364_hmPOS_GRCh37 | 11 | 102619072 | G | A | 0.005238336  | YES |
| PGS000364_hmPOS_GRCh37 | 11 | 102626401 | G | A | 0.024230101  | YES |
| PGS000364_hmPOS_GRCh37 | 11 | 112749621 | C | A | 0.009431873  | YES |
| PGS000364_hmPOS_GRCh37 | 11 | 112754441 | G | A | 0.008564432  | YES |
| PGS000364_hmPOS_GRCh37 | 11 | 123171353 | C | T | -0.002336281 | YES |
| PGS000364_hmPOS_GRCh37 | 11 | 125246545 | G | A | 9.4715E-05   | YES |
| PGS000364_hmPOS_GRCh37 | 11 | 131449365 | C | A | 0.022795356  | YES |
| PGS000364_hmPOS_GRCh37 | 11 | 131449439 | G | A | 0.023445733  | YES |
| PGS000364_hmPOS_GRCh37 | 11 | 131451947 | T | C | 0.023393511  | YES |
| PGS000364_hmPOS_GRCh37 | 11 | 131452418 | T | C | 0.023735005  | YES |
| PGS000364_hmPOS_GRCh37 | 11 | 131452511 | T | C | 0.023660025  | YES |
| PGS000364_hmPOS_GRCh37 | 11 | 131452912 | C | T | 0.023399741  | YES |
| PGS000364_hmPOS_GRCh37 | 11 | 131453013 | G | A | 0.023246312  | YES |
| PGS000364_hmPOS_GRCh37 | 11 | 131454686 | C | G | 0.023503076  | NO  |
| PGS000364_hmPOS_GRCh37 | 11 | 131459065 | T | G | 0.011192467  | YES |
| PGS000364_hmPOS_GRCh37 | 11 | 131459900 | G | A | 0.020142264  | YES |
| PGS000364_hmPOS_GRCh37 | 11 | 131461173 | A | G | 0.021830435  | YES |
| PGS000364_hmPOS_GRCh37 | 11 | 131461473 | A | C | 0.01875157   | YES |
| PGS000364_hmPOS_GRCh37 | 11 | 131766987 | T | C | -0.007348433 | YES |
| PGS000364_hmPOS_GRCh37 | 12 | 1917188   | C | T | 0.003153511  | YES |
| PGS000364_hmPOS_GRCh37 | 12 | 3060224   | C | A | 0.005457662  | YES |
| PGS000364_hmPOS_GRCh37 | 12 | 4318723   | T | C | -0.008041023 | YES |
| PGS000364_hmPOS_GRCh37 | 12 | 6545611   | A | G | 0.004912894  | YES |
| PGS000364_hmPOS_GRCh37 | 12 | 7412101   | G | A | 0.014091314  | YES |
| PGS000364_hmPOS_GRCh37 | 12 | 9782811   | T | C | 0.010709846  | YES |
| PGS000364_hmPOS_GRCh37 | 12 | 16192611  | G | A | 0.018841117  | YES |
| PGS000364_hmPOS_GRCh37 | 12 | 19801876  | G | T | -0.000400377 | YES |
| PGS000364_hmPOS_GRCh37 | 12 | 19802337  | A | G | -0.000194244 | YES |
| PGS000364_hmPOS_GRCh37 | 12 | 19803880  | G | T | -0.00077434  | YES |
| PGS000364_hmPOS_GRCh37 | 12 | 19805071  | G | C | -0.000745929 | NO  |
| PGS000364_hmPOS_GRCh37 | 12 | 19807016  | C | T | -0.000691067 | YES |
| PGS000364_hmPOS_GRCh37 | 12 | 19810161  | G | T | -0.001768408 | YES |
| PGS000364_hmPOS_GRCh37 | 12 | 27015040  | A | G | 0.000460151  | YES |
| PGS000364_hmPOS_GRCh37 | 12 | 27015992  | T | C | 0.002665198  | YES |
| PGS000364_hmPOS_GRCh37 | 12 | 27020704  | T | C | 0.004567045  | YES |
| PGS000364_hmPOS_GRCh37 | 12 | 27023804  | C | T | 0.003165469  | YES |
| PGS000364_hmPOS_GRCh37 | 12 | 56871314  | A | G | -0.001139632 | YES |
| PGS000364_hmPOS_GRCh37 | 12 | 56874522  | A | C | -0.001706044 | YES |
| PGS000364_hmPOS_GRCh37 | 12 | 56878120  | A | G | -0.001701671 | YES |
| PGS000364_hmPOS_GRCh37 | 12 | 56879548  | T | C | -0.001667292 | YES |
| PGS000364_hmPOS_GRCh37 | 12 | 64367622  | G | A | 0.026860676  | YES |
| PGS000364_hmPOS_GRCh37 | 12 | 64392815  | T | C | 0.002440499  | YES |
| PGS000364_hmPOS_GRCh37 | 12 | 102871356 | C | T | 0.013377739  | YES |
| PGS000364_hmPOS_GRCh37 | 12 | 118288488 | A | G | -0.002089097 | YES |
| PGS000364_hmPOS_GRCh37 | 12 | 118290238 | A | T | -0.005679245 | NO  |
| PGS000364_hmPOS_GRCh37 | 12 | 118426505 | A | G | 0.003741739  | YES |
| PGS000364_hmPOS_GRCh37 | 12 | 119472411 | T | C | 0.004994363  | YES |
| PGS000364_hmPOS_GRCh37 | 12 | 119496871 | G | A | 0.008272297  | YES |
| PGS000364_hmPOS_GRCh37 | 12 | 119498993 | A | C | 0.008714137  | YES |
| PGS000364_hmPOS_GRCh37 | 12 | 119507217 | A | G | 0.012495199  | YES |
| PGS000364_hmPOS_GRCh37 | 12 | 119507266 | T | A | 0.008799403  | NO  |
| PGS000364_hmPOS_GRCh37 | 12 | 119508185 | C | T | 0.012587822  | YES |
| PGS000364_hmPOS_GRCh37 | 12 | 119508430 | C | T | 0.012597576  | YES |
| PGS000364_hmPOS_GRCh37 | 12 | 119509633 | G | C | 0.00873157   | NO  |
| PGS000364_hmPOS_GRCh37 | 12 | 119510036 | A | G | 0.00881446   | YES |
| PGS000364_hmPOS_GRCh37 | 12 | 119516437 | G | C | 0.009231229  | NO  |

|                        |    |           |   |   |                     |     |
|------------------------|----|-----------|---|---|---------------------|-----|
| PGS000364_hmPOS_GRCh37 | 12 | 119516507 | C | T | 0.00925714          | YES |
| PGS000364_hmPOS_GRCh37 | 12 | 119516574 | T | A | 0.012446491         | NO  |
| PGS000364_hmPOS_GRCh37 | 12 | 119520723 | T | C | 0.0095281           | YES |
| PGS000364_hmPOS_GRCh37 | 12 | 119521009 | C | A | 0.009462947         | YES |
| PGS000364_hmPOS_GRCh37 | 12 | 119521863 | A | G | 0.008084306         | YES |
| PGS000364_hmPOS_GRCh37 | 12 | 120195082 | G | C | -0.000151183        | NO  |
| PGS000364_hmPOS_GRCh37 | 12 | 123437129 | T | C | 0.000779713         | YES |
| PGS000364_hmPOS_GRCh37 | 12 | 123832946 | A | G | 0.008960039         | YES |
| PGS000364_hmPOS_GRCh37 | 12 | 123919299 | A | C | 0.016930218         | YES |
| PGS000364_hmPOS_GRCh37 | 12 | 125808945 | G | A | 0.010513493         | YES |
| PGS000364_hmPOS_GRCh37 | 12 | 125811518 | G | A | 0.009394413         | YES |
| PGS000364_hmPOS_GRCh37 | 12 | 125812398 | G | A | 0.008375983         | YES |
| PGS000364_hmPOS_GRCh37 | 12 | 125813882 | T | C | 0.000472525         | YES |
| PGS000364_hmPOS_GRCh37 | 12 | 125813939 | G | C | 0.000866323         | NO  |
| PGS000364_hmPOS_GRCh37 | 12 | 132127109 | T | C | 0.016649605         | YES |
| PGS000364_hmPOS_GRCh37 | 13 | 23460115  | T | G | 0.001085299         | YES |
| PGS000364_hmPOS_GRCh37 | 13 | 23464296  | A | G | 0.010456423         | YES |
| PGS000364_hmPOS_GRCh37 | 13 | 40339158  | T | C | 0.006410078         | YES |
| PGS000364_hmPOS_GRCh37 | 13 | 40512443  | T | C | 0.002394144         | YES |
| PGS000364_hmPOS_GRCh37 | 13 | 45277921  | T | C | 0.001155501         | YES |
| PGS000364_hmPOS_GRCh37 | 13 | 45279711  | A | G | 7.52455425617749e-6 | YES |
| PGS000364_hmPOS_GRCh37 | 13 | 45281435  | G | T | 0.001421014         | YES |
| PGS000364_hmPOS_GRCh37 | 13 | 45282032  | T | G | 0.001334659         | YES |
| PGS000364_hmPOS_GRCh37 | 13 | 45282108  | C | T | 0.000219097         | YES |
| PGS000364_hmPOS_GRCh37 | 13 | 45282123  | T | G | 0.001533343         | YES |
| PGS000364_hmPOS_GRCh37 | 13 | 45282165  | C | T | 0.000156926         | YES |
| PGS000364_hmPOS_GRCh37 | 13 | 45283021  | A | C | 0.001323191         | YES |
| PGS000364_hmPOS_GRCh37 | 13 | 45283387  | C | T | 0.001563176         | YES |
| PGS000364_hmPOS_GRCh37 | 13 | 45290219  | A | G | 0.000673085         | YES |
| PGS000364_hmPOS_GRCh37 | 13 | 45290220  | A | C | 0.000673085         | YES |
| PGS000364_hmPOS_GRCh37 | 13 | 45290248  | C | A | 0.000458859         | YES |
| PGS000364_hmPOS_GRCh37 | 13 | 47358540  | C | T | -0.000106101        | YES |
| PGS000364_hmPOS_GRCh37 | 13 | 47366033  | A | G | -0.000126135        | YES |
| PGS000364_hmPOS_GRCh37 | 13 | 47388527  | T | C | -0.000387992        | YES |
| PGS000364_hmPOS_GRCh37 | 13 | 50945705  | C | T | 0.004599067         | YES |
| PGS000364_hmPOS_GRCh37 | 13 | 51036012  | G | A | 0.003793568         | YES |
| PGS000364_hmPOS_GRCh37 | 13 | 54862440  | C | T | 0.002974922         | YES |
| PGS000364_hmPOS_GRCh37 | 13 | 66230992  | C | T | 0.005802564         | YES |
| PGS000364_hmPOS_GRCh37 | 13 | 66271716  | A | G | 0.009659613         | YES |
| PGS000364_hmPOS_GRCh37 | 13 | 66278609  | G | A | 0.009839628         | YES |
| PGS000364_hmPOS_GRCh37 | 13 | 66282880  | G | C | 0.005561777         | NO  |
| PGS000364_hmPOS_GRCh37 | 13 | 66303531  | T | C | 0.005742591         | YES |
| PGS000364_hmPOS_GRCh37 | 13 | 66326352  | G | A | 0.005567126         | YES |
| PGS000364_hmPOS_GRCh37 | 13 | 66338384  | G | A | 0.000482008         | YES |
| PGS000364_hmPOS_GRCh37 | 13 | 67189769  | A | C | 0.00379078          | YES |
| PGS000364_hmPOS_GRCh37 | 13 | 74438910  | G | A | 0.006694225         | YES |
| PGS000364_hmPOS_GRCh37 | 13 | 74440131  | A | G | 0.008780631         | YES |
| PGS000364_hmPOS_GRCh37 | 13 | 74441736  | G | A | 0.004806782         | YES |
| PGS000364_hmPOS_GRCh37 | 13 | 84597229  | A | C | 0.001761835         | YES |
| PGS000364_hmPOS_GRCh37 | 13 | 85604370  | C | T | 0.002920811         | YES |
| PGS000364_hmPOS_GRCh37 | 13 | 96741468  | A | G | 0.005566999         | YES |
| PGS000364_hmPOS_GRCh37 | 13 | 96812343  | G | A | 0.005885899         | YES |
| PGS000364_hmPOS_GRCh37 | 13 | 97229113  | A | G | 0.01157628          | YES |
| PGS000364_hmPOS_GRCh37 | 13 | 104428829 | C | T | 0.004844436         | YES |
| PGS000364_hmPOS_GRCh37 | 13 | 104428900 | G | T | 0.004884695         | YES |
| PGS000364_hmPOS_GRCh37 | 13 | 104430136 | G | A | 0.004928515         | YES |
| PGS000364_hmPOS_GRCh37 | 13 | 104436201 | G | A | 0.004999741         | YES |
| PGS000364_hmPOS_GRCh37 | 13 | 104519202 | C | G | 0.009026399         | NO  |
| PGS000364_hmPOS_GRCh37 | 13 | 109721968 | G | A | -0.000573096        | YES |
| PGS000364_hmPOS_GRCh37 | 14 | 21050409  | G | T | 0.006676162         | YES |
| PGS000364_hmPOS_GRCh37 | 14 | 21051027  | T | A | 0.000257945         | NO  |
| PGS000364_hmPOS_GRCh37 | 14 | 23774161  | T | C | 0.001603206         | YES |
| PGS000364_hmPOS_GRCh37 | 14 | 23775111  | A | G | 0.000692392         | YES |

|                        |    |          |   |   |              |     |
|------------------------|----|----------|---|---|--------------|-----|
| PGS000364_hmPOS_GRCh37 | 14 | 26184001 | A | G | 0.004801433  | YES |
| PGS000364_hmPOS_GRCh37 | 14 | 26185349 | A | T | 0.002120163  | NO  |
| PGS000364_hmPOS_GRCh37 | 14 | 26186599 | C | T | 0.001424939  | YES |
| PGS000364_hmPOS_GRCh37 | 14 | 26189124 | A | G | 0.000992735  | YES |
| PGS000364_hmPOS_GRCh37 | 14 | 26189729 | C | A | 0.000847757  | YES |
| PGS000364_hmPOS_GRCh37 | 14 | 26190548 | T | G | 0.000723751  | YES |
| PGS000364_hmPOS_GRCh37 | 14 | 26191258 | G | A | 0.000446213  | YES |
| PGS000364_hmPOS_GRCh37 | 14 | 26191931 | T | C | 0.000500199  | YES |
| PGS000364_hmPOS_GRCh37 | 14 | 29386736 | G | C | 0.006770499  | NO  |
| PGS000364_hmPOS_GRCh37 | 14 | 29405932 | C | T | 0.028113662  | YES |
| PGS000364_hmPOS_GRCh37 | 14 | 29429110 | G | A | 0.026892601  | YES |
| PGS000364_hmPOS_GRCh37 | 14 | 29450699 | A | G | 0.029154439  | YES |
| PGS000364_hmPOS_GRCh37 | 14 | 33499208 | C | G | 0.005105269  | NO  |
| PGS000364_hmPOS_GRCh37 | 14 | 33501778 | G | A | 0.004067879  | YES |
| PGS000364_hmPOS_GRCh37 | 14 | 33503533 | G | C | 0.00387316   | NO  |
| PGS000364_hmPOS_GRCh37 | 14 | 33505728 | G | T | 0.00084138   | YES |
| PGS000364_hmPOS_GRCh37 | 14 | 33506256 | T | A | 0.000912719  | NO  |
| PGS000364_hmPOS_GRCh37 | 14 | 33507902 | T | A | 0.001286114  | NO  |
| PGS000364_hmPOS_GRCh37 | 14 | 33513041 | G | A | 0.002329511  | YES |
| PGS000364_hmPOS_GRCh37 | 14 | 34262647 | A | G | 0.000235989  | YES |
| PGS000364_hmPOS_GRCh37 | 14 | 62081087 | G | A | 0.023296441  | YES |
| PGS000364_hmPOS_GRCh37 | 14 | 65356268 | A | G | 0.001006381  | YES |
| PGS000364_hmPOS_GRCh37 | 14 | 65369329 | T | C | 0.000983133  | YES |
| PGS000364_hmPOS_GRCh37 | 14 | 65370321 | G | T | 0.000972449  | YES |
| PGS000364_hmPOS_GRCh37 | 14 | 65372829 | C | T | 0.00107651   | YES |
| PGS000364_hmPOS_GRCh37 | 14 | 65378856 | C | T | 0.000957917  | YES |
| PGS000364_hmPOS_GRCh37 | 14 | 65380579 | T | C | 0.001092056  | YES |
| PGS000364_hmPOS_GRCh37 | 14 | 65381464 | G | C | 0.001129062  | NO  |
| PGS000364_hmPOS_GRCh37 | 14 | 65388641 | C | T | 0.000628845  | YES |
| PGS000364_hmPOS_GRCh37 | 14 | 65396648 | G | C | 0.00144435   | NO  |
| PGS000364_hmPOS_GRCh37 | 14 | 65403525 | A | T | 0.001440913  | NO  |
| PGS000364_hmPOS_GRCh37 | 14 | 65403891 | G | C | 0.000623985  | NO  |
| PGS000364_hmPOS_GRCh37 | 14 | 65404059 | A | G | 0.000627079  | YES |
| PGS000364_hmPOS_GRCh37 | 14 | 66292820 | T | C | 0.003802127  | YES |
| PGS000364_hmPOS_GRCh37 | 14 | 72799119 | G | T | 0.011985692  | YES |
| PGS000364_hmPOS_GRCh37 | 14 | 75676634 | A | G | 0.00184262   | YES |
| PGS000364_hmPOS_GRCh37 | 14 | 75677105 | G | T | 0.001306487  | YES |
| PGS000364_hmPOS_GRCh37 | 14 | 75679642 | G | C | 0.000541175  | NO  |
| PGS000364_hmPOS_GRCh37 | 14 | 76031506 | A | G | -0.001932329 | YES |
| PGS000364_hmPOS_GRCh37 | 14 | 76031623 | A | G | -0.000132426 | YES |
| PGS000364_hmPOS_GRCh37 | 14 | 77788838 | A | G | -0.009537091 | YES |
| PGS000364_hmPOS_GRCh37 | 14 | 77792824 | C | G | -0.011818284 | NO  |
| PGS000364_hmPOS_GRCh37 | 14 | 77799841 | A | G | -0.015068169 | YES |
| PGS000364_hmPOS_GRCh37 | 14 | 77801282 | G | T | -0.012968818 | YES |
| PGS000364_hmPOS_GRCh37 | 14 | 77801431 | C | T | -0.013833465 | YES |
| PGS000364_hmPOS_GRCh37 | 14 | 77801654 | C | G | -0.0142032   | NO  |
| PGS000364_hmPOS_GRCh37 | 14 | 77809939 | T | C | -0.002638762 | YES |
| PGS000364_hmPOS_GRCh37 | 14 | 77810713 | C | G | -0.002675257 | NO  |
| PGS000364_hmPOS_GRCh37 | 14 | 77836113 | A | G | -0.001735854 | YES |
| PGS000364_hmPOS_GRCh37 | 14 | 77841167 | A | G | -0.001130308 | YES |
| PGS000364_hmPOS_GRCh37 | 14 | 78369285 | T | G | 0.004377864  | YES |
| PGS000364_hmPOS_GRCh37 | 14 | 78371403 | G | A | 0.002156225  | YES |
| PGS000364_hmPOS_GRCh37 | 14 | 88978364 | A | T | 0.000632943  | NO  |
| PGS000364_hmPOS_GRCh37 | 14 | 97955062 | G | A | 0.000861893  | YES |
| PGS000364_hmPOS_GRCh37 | 14 | 97958182 | A | G | 0.001120308  | YES |
| PGS000364_hmPOS_GRCh37 | 14 | 97962078 | A | G | 0.000800805  | YES |
| PGS000364_hmPOS_GRCh37 | 15 | 33978034 | G | T | 0.000389445  | YES |
| PGS000364_hmPOS_GRCh37 | 15 | 57971825 | G | A | 0.000348204  | YES |
| PGS000364_hmPOS_GRCh37 | 15 | 57973554 | G | A | 0.000351456  | YES |
| PGS000364_hmPOS_GRCh37 | 15 | 57975031 | T | C | 0.000486862  | YES |
| PGS000364_hmPOS_GRCh37 | 15 | 61614338 | T | C | -0.001485146 | YES |
| PGS000364_hmPOS_GRCh37 | 15 | 63219735 | A | G | -0.000268233 | YES |
| PGS000364_hmPOS_GRCh37 | 15 | 63220061 | T | C | -0.000317525 | YES |

|                        |    |          |   |   |              |     |
|------------------------|----|----------|---|---|--------------|-----|
| PGS000364_hmPOS_GRCh37 | 15 | 72081280 | T | G | 0.002565888  | YES |
| PGS000364_hmPOS_GRCh37 | 15 | 76474749 | A | G | 0.003008002  | YES |
| PGS000364_hmPOS_GRCh37 | 15 | 76478925 | T | C | 0.003255966  | YES |
| PGS000364_hmPOS_GRCh37 | 15 | 76484947 | T | A | 0.006168636  | NO  |
| PGS000364_hmPOS_GRCh37 | 15 | 76485536 | G | A | 0.006223414  | YES |
| PGS000364_hmPOS_GRCh37 | 15 | 76487507 | C | G | 0.00624991   | NO  |
| PGS000364_hmPOS_GRCh37 | 15 | 76503295 | C | A | 0.002803993  | YES |
| PGS000364_hmPOS_GRCh37 | 15 | 76507206 | A | G | 0.006183455  | YES |
| PGS000364_hmPOS_GRCh37 | 15 | 76545844 | G | A | 0.004765596  | YES |
| PGS000364_hmPOS_GRCh37 | 15 | 76546933 | A | G | 0.007282979  | YES |
| PGS000364_hmPOS_GRCh37 | 15 | 76554755 | T | C | 0.004998787  | YES |
| PGS000364_hmPOS_GRCh37 | 15 | 76555986 | T | C | 0.005482475  | YES |
| PGS000364_hmPOS_GRCh37 | 15 | 76558870 | C | T | 0.004639579  | YES |
| PGS000364_hmPOS_GRCh37 | 15 | 76568209 | A | G | 0.002494346  | YES |
| PGS000364_hmPOS_GRCh37 | 15 | 80657732 | T | C | 0.000558608  | YES |
| PGS000364_hmPOS_GRCh37 | 15 | 80710748 | T | C | 0.009977249  | YES |
| PGS000364_hmPOS_GRCh37 | 15 | 89147342 | A | G | -0.007683361 | YES |
| PGS000364_hmPOS_GRCh37 | 15 | 89637418 | A | C | 0.000861799  | YES |
| PGS000364_hmPOS_GRCh37 | 15 | 89638091 | T | C | 0.00094344   | YES |
| PGS000364_hmPOS_GRCh37 | 15 | 89638440 | A | G | 0.000621548  | YES |
| PGS000364_hmPOS_GRCh37 | 15 | 89644938 | A | G | 0.004235712  | YES |
| PGS000364_hmPOS_GRCh37 | 15 | 89645230 | G | A | 0.006150634  | YES |
| PGS000364_hmPOS_GRCh37 | 15 | 89645942 | T | C | 0.004586053  | YES |
| PGS000364_hmPOS_GRCh37 | 15 | 89648943 | T | C | 0.017339192  | YES |
| PGS000364_hmPOS_GRCh37 | 15 | 89649276 | G | A | 0.016957928  | YES |
| PGS000364_hmPOS_GRCh37 | 15 | 89649508 | A | G | 0.017053926  | YES |
| PGS000364_hmPOS_GRCh37 | 15 | 89649704 | T | C | 0.00789207   | YES |
| PGS000364_hmPOS_GRCh37 | 15 | 89650795 | T | C | 0.009217704  | YES |
| PGS000364_hmPOS_GRCh37 | 15 | 89651254 | C | G | 0.017424969  | NO  |
| PGS000364_hmPOS_GRCh37 | 15 | 89652138 | A | G | 0.017411686  | YES |
| PGS000364_hmPOS_GRCh37 | 15 | 89652552 | A | G | 0.017721359  | YES |
| PGS000364_hmPOS_GRCh37 | 15 | 89652572 | G | A | 0.007940088  | YES |
| PGS000364_hmPOS_GRCh37 | 15 | 89653262 | G | A | 0.00672086   | YES |
| PGS000364_hmPOS_GRCh37 | 15 | 89653764 | G | A | 0.006309179  | YES |
| PGS000364_hmPOS_GRCh37 | 15 | 89654197 | A | T | 0.017114707  | NO  |
| PGS000364_hmPOS_GRCh37 | 15 | 89654764 | G | A | 0.006425936  | YES |
| PGS000364_hmPOS_GRCh37 | 15 | 89654976 | C | T | 0.016364508  | YES |
| PGS000364_hmPOS_GRCh37 | 15 | 89655405 | G | C | 0.00801344   | NO  |
| PGS000364_hmPOS_GRCh37 | 15 | 89658421 | A | G | 0.004789794  | YES |
| PGS000364_hmPOS_GRCh37 | 15 | 89659425 | T | C | 0.014714998  | YES |
| PGS000364_hmPOS_GRCh37 | 15 | 89659451 | A | G | 0.005553364  | YES |
| PGS000364_hmPOS_GRCh37 | 15 | 89659467 | G | C | 0.005562703  | NO  |
| PGS000364_hmPOS_GRCh37 | 15 | 89660319 | C | T | 0.005607125  | YES |
| PGS000364_hmPOS_GRCh37 | 15 | 89660476 | C | T | 0.0050143    | YES |
| PGS000364_hmPOS_GRCh37 | 15 | 89660915 | A | G | 0.014541967  | YES |
| PGS000364_hmPOS_GRCh37 | 15 | 89660987 | A | G | 0.004815387  | YES |
| PGS000364_hmPOS_GRCh37 | 15 | 89661039 | T | C | 0.003879761  | YES |
| PGS000364_hmPOS_GRCh37 | 15 | 89661746 | G | T | 0.015082482  | YES |
| PGS000364_hmPOS_GRCh37 | 15 | 89663644 | A | G | 0.01460769   | YES |
| PGS000364_hmPOS_GRCh37 | 15 | 89665802 | T | G | 0.007519449  | YES |
| PGS000364_hmPOS_GRCh37 | 15 | 89665823 | T | G | 0.007390938  | YES |
| PGS000364_hmPOS_GRCh37 | 15 | 89666056 | C | G | 0.008115838  | NO  |
| PGS000364_hmPOS_GRCh37 | 15 | 89666734 | A | G | 0.017027519  | YES |
| PGS000364_hmPOS_GRCh37 | 15 | 89670504 | T | C | 0.005521341  | YES |
| PGS000364_hmPOS_GRCh37 | 15 | 90325061 | T | C | 0.005700167  | YES |
| PGS000364_hmPOS_GRCh37 | 15 | 90326422 | C | A | 0.006171353  | YES |
| PGS000364_hmPOS_GRCh37 | 15 | 90367960 | A | C | -0.00473111  | YES |
| PGS000364_hmPOS_GRCh37 | 15 | 93758050 | T | C | 0.009044824  | YES |
| PGS000364_hmPOS_GRCh37 | 15 | 95100958 | T | A | 0.000256387  | NO  |
| PGS000364_hmPOS_GRCh37 | 15 | 95110896 | A | C | -0.011793801 | YES |
| PGS000364_hmPOS_GRCh37 | 15 | 95125867 | A | G | 0.001682646  | YES |
| PGS000364_hmPOS_GRCh37 | 15 | 96092442 | A | C | 0.002863858  | YES |
| PGS000364_hmPOS_GRCh37 | 15 | 96092607 | A | G | 0.003351325  | YES |

|                        |    |          |   |   |              |     |
|------------------------|----|----------|---|---|--------------|-----|
| PGS000364_hmPOS_GRCh37 | 15 | 96093765 | A | G | 0.003352274  | YES |
| PGS000364_hmPOS_GRCh37 | 15 | 96094552 | T | G | 0.002365142  | YES |
| PGS000364_hmPOS_GRCh37 | 15 | 96094553 | A | T | 0.002342478  | NO  |
| PGS000364_hmPOS_GRCh37 | 15 | 96095240 | G | A | 0.002307945  | YES |
| PGS000364_hmPOS_GRCh37 | 15 | 98020603 | T | C | 0.006992336  | YES |
| PGS000364_hmPOS_GRCh37 | 15 | 98202210 | A | G | 0.003721747  | YES |
| PGS000364_hmPOS_GRCh37 | 15 | 98215184 | A | G | 0.000601976  | YES |
| PGS000364_hmPOS_GRCh37 | 16 | 6451325  | A | G | -0.001292349 | YES |
| PGS000364_hmPOS_GRCh37 | 16 | 6452267  | A | G | -0.000435956 | YES |
| PGS000364_hmPOS_GRCh37 | 16 | 6452536  | G | A | -0.000445806 | YES |
| PGS000364_hmPOS_GRCh37 | 16 | 6452861  | C | G | -0.005798569 | NO  |
| PGS000364_hmPOS_GRCh37 | 16 | 6453057  | C | G | -0.001631798 | NO  |
| PGS000364_hmPOS_GRCh37 | 16 | 6456970  | G | C | -0.001386881 | NO  |
| PGS000364_hmPOS_GRCh37 | 16 | 6457020  | C | T | -0.001777345 | YES |
| PGS000364_hmPOS_GRCh37 | 16 | 6457312  | G | A | -0.000482719 | YES |
| PGS000364_hmPOS_GRCh37 | 16 | 6457453  | G | A | -0.000528196 | YES |
| PGS000364_hmPOS_GRCh37 | 16 | 6460948  | G | C | -0.005361136 | NO  |
| PGS000364_hmPOS_GRCh37 | 16 | 6462964  | T | C | -0.004707048 | YES |
| PGS000364_hmPOS_GRCh37 | 16 | 6462970  | T | C | -0.004486955 | YES |
| PGS000364_hmPOS_GRCh37 | 16 | 6463298  | G | C | -0.003126431 | NO  |
| PGS000364_hmPOS_GRCh37 | 16 | 6463599  | A | G | -0.003295335 | YES |
| PGS000364_hmPOS_GRCh37 | 16 | 6464203  | C | A | -0.002040302 | YES |
| PGS000364_hmPOS_GRCh37 | 16 | 6464448  | G | A | -0.003367841 | YES |
| PGS000364_hmPOS_GRCh37 | 16 | 6464894  | G | C | -0.002737087 | NO  |
| PGS000364_hmPOS_GRCh37 | 16 | 8857096  | A | G | 0.000709914  | YES |
| PGS000364_hmPOS_GRCh37 | 16 | 8901081  | C | A | 0.000734821  | YES |
| PGS000364_hmPOS_GRCh37 | 16 | 10856535 | A | G | 0.000161359  | YES |
| PGS000364_hmPOS_GRCh37 | 16 | 11225876 | T | C | 0.002546454  | YES |
| PGS000364_hmPOS_GRCh37 | 16 | 19413295 | G | A | -0.002624826 | YES |
| PGS000364_hmPOS_GRCh37 | 16 | 24953913 | T | C | 0.004243541  | YES |
| PGS000364_hmPOS_GRCh37 | 16 | 48654334 | C | T | 0.000349387  | YES |
| PGS000364_hmPOS_GRCh37 | 16 | 49253077 | T | C | 0.006364565  | YES |
| PGS000364_hmPOS_GRCh37 | 16 | 49268473 | A | G | 0.006336659  | YES |
| PGS000364_hmPOS_GRCh37 | 16 | 50813997 | A | G | -0.007009303 | YES |
| PGS000364_hmPOS_GRCh37 | 16 | 50815432 | T | C | -0.00555307  | YES |
| PGS000364_hmPOS_GRCh37 | 16 | 50817489 | A | G | -0.005603944 | YES |
| PGS000364_hmPOS_GRCh37 | 16 | 66933184 | G | A | 0.002988007  | YES |
| PGS000364_hmPOS_GRCh37 | 16 | 67489313 | A | G | 0.012071283  | YES |
| PGS000364_hmPOS_GRCh37 | 16 | 84656502 | C | T | 0.001488734  | YES |
| PGS000364_hmPOS_GRCh37 | 16 | 84662704 | G | T | 0.014877544  | YES |
| PGS000364_hmPOS_GRCh37 | 16 | 84664322 | A | G | -0.003115408 | YES |
| PGS000364_hmPOS_GRCh37 | 16 | 84668807 | G | C | -0.002974868 | NO  |
| PGS000364_hmPOS_GRCh37 | 16 | 84671009 | A | G | 0.0005347    | YES |
| PGS000364_hmPOS_GRCh37 | 16 | 84683281 | T | G | -0.004551913 | YES |
| PGS000364_hmPOS_GRCh37 | 16 | 84683484 | A | G | -0.010740539 | YES |
| PGS000364_hmPOS_GRCh37 | 16 | 84685509 | T | A | -0.005102433 | NO  |
| PGS000364_hmPOS_GRCh37 | 16 | 85617849 | C | T | 0.006897432  | YES |
| PGS000364_hmPOS_GRCh37 | 17 | 4706356  | T | C | 0.01035995   | YES |
| PGS000364_hmPOS_GRCh37 | 17 | 4710591  | A | G | 0.006405486  | YES |
| PGS000364_hmPOS_GRCh37 | 17 | 4710733  | C | T | 0.006476545  | YES |
| PGS000364_hmPOS_GRCh37 | 17 | 4712230  | T | C | 0.001904046  | YES |
| PGS000364_hmPOS_GRCh37 | 17 | 4712617  | T | C | 0.00211839   | YES |
| PGS000364_hmPOS_GRCh37 | 17 | 4725211  | C | T | 0.008264815  | YES |
| PGS000364_hmPOS_GRCh37 | 17 | 4732302  | G | C | 0.000239096  | NO  |
| PGS000364_hmPOS_GRCh37 | 17 | 4732535  | C | T | 0.001302191  | YES |
| PGS000364_hmPOS_GRCh37 | 17 | 4943176  | G | A | 0.001751144  | YES |
| PGS000364_hmPOS_GRCh37 | 17 | 4949078  | A | T | 0.003675891  | NO  |
| PGS000364_hmPOS_GRCh37 | 17 | 5765025  | A | G | -0.000476163 | YES |
| PGS000364_hmPOS_GRCh37 | 17 | 6327771  | C | T | -0.002855718 | YES |
| PGS000364_hmPOS_GRCh37 | 17 | 25597712 | A | G | -0.000771711 | YES |
| PGS000364_hmPOS_GRCh37 | 17 | 25599090 | G | C | -0.000439573 | NO  |
| PGS000364_hmPOS_GRCh37 | 17 | 43972176 | G | C | -0.007500319 | NO  |
| PGS000364_hmPOS_GRCh37 | 17 | 48124582 | G | T | 0.00212754   | YES |

|                        |    |          |   |   |                     |     |
|------------------------|----|----------|---|---|---------------------|-----|
| PGS000364_hmPOS_GRCh37 | 17 | 53667178 | G | A | 0.001559372         | YES |
| PGS000364_hmPOS_GRCh37 | 17 | 53713610 | A | G | 0.010924765         | YES |
| PGS000364_hmPOS_GRCh37 | 17 | 53727616 | T | C | 0.004508573         | YES |
| PGS000364_hmPOS_GRCh37 | 17 | 53789045 | C | T | 0.00543526          | YES |
| PGS000364_hmPOS_GRCh37 | 17 | 53795175 | A | T | 0.003421244         | NO  |
| PGS000364_hmPOS_GRCh37 | 17 | 76699587 | T | C | 0.013842488         | YES |
| PGS000364_hmPOS_GRCh37 | 17 | 76802098 | T | C | 0.006593668         | YES |
| PGS000364_hmPOS_GRCh37 | 17 | 76836414 | A | G | 0.001497243         | YES |
| PGS000364_hmPOS_GRCh37 | 17 | 77310798 | C | T | 0.012236998         | YES |
| PGS000364_hmPOS_GRCh37 | 17 | 78879613 | C | G | 0.008939302         | NO  |
| PGS000364_hmPOS_GRCh37 | 17 | 78881927 | A | G | 0.000555891         | YES |
| PGS000364_hmPOS_GRCh37 | 17 | 78882840 | G | A | 0.004159515         | YES |
| PGS000364_hmPOS_GRCh37 | 17 | 78890238 | T | C | 0.004056748         | YES |
| PGS000364_hmPOS_GRCh37 | 17 | 78890955 | A | C | 0.003651071         | YES |
| PGS000364_hmPOS_GRCh37 | 17 | 78890975 | T | C | 0.00367978          | YES |
| PGS000364_hmPOS_GRCh37 | 17 | 78891030 | C | G | 0.003304991         | NO  |
| PGS000364_hmPOS_GRCh37 | 17 | 78891741 | T | C | 0.006444394         | YES |
| PGS000364_hmPOS_GRCh37 | 17 | 78895301 | T | G | 0.000261784         | YES |
| PGS000364_hmPOS_GRCh37 | 17 | 78896488 | T | C | 0.000475737         | YES |
| PGS000364_hmPOS_GRCh37 | 17 | 78897056 | G | C | 0.000763458         | NO  |
| PGS000364_hmPOS_GRCh37 | 17 | 78901443 | G | T | 0.000973817         | YES |
| PGS000364_hmPOS_GRCh37 | 17 | 78903681 | C | T | 0.000754083         | YES |
| PGS000364_hmPOS_GRCh37 | 17 | 78907809 | A | C | 0.000815714         | YES |
| PGS000364_hmPOS_GRCh37 | 17 | 78914245 | T | G | 0.001434127         | YES |
| PGS000364_hmPOS_GRCh37 | 17 | 78915387 | T | A | 0.003762539         | NO  |
| PGS000364_hmPOS_GRCh37 | 17 | 78916379 | A | G | 0.00128652          | YES |
| PGS000364_hmPOS_GRCh37 | 17 | 78919162 | A | G | 0.000382464         | YES |
| PGS000364_hmPOS_GRCh37 | 18 | 1330559  | A | G | 0.007291319         | YES |
| PGS000364_hmPOS_GRCh37 | 18 | 1378362  | A | G | 0.006318356         | YES |
| PGS000364_hmPOS_GRCh37 | 18 | 9262101  | C | T | 0.001785656         | YES |
| PGS000364_hmPOS_GRCh37 | 18 | 9278178  | G | T | 0.001941084         | YES |
| PGS000364_hmPOS_GRCh37 | 18 | 9289676  | G | T | 0.000737118         | YES |
| PGS000364_hmPOS_GRCh37 | 18 | 9338344  | T | C | 0.001993433         | YES |
| PGS000364_hmPOS_GRCh37 | 18 | 9339276  | G | A | 0.002088517         | YES |
| PGS000364_hmPOS_GRCh37 | 18 | 9376108  | A | T | 0.003726923         | NO  |
| PGS000364_hmPOS_GRCh37 | 18 | 9379877  | G | A | 0.002850622         | YES |
| PGS000364_hmPOS_GRCh37 | 18 | 9390227  | T | C | 0.003390706         | YES |
| PGS000364_hmPOS_GRCh37 | 18 | 9390878  | A | G | 0.003384866         | YES |
| PGS000364_hmPOS_GRCh37 | 18 | 9396597  | G | A | 0.003331276         | YES |
| PGS000364_hmPOS_GRCh37 | 18 | 21743391 | T | A | 0.001212498         | NO  |
| PGS000364_hmPOS_GRCh37 | 18 | 34010470 | A | G | 0.000412753         | YES |
| PGS000364_hmPOS_GRCh37 | 18 | 57171281 | T | C | -0.000114562        | YES |
| PGS000364_hmPOS_GRCh37 | 18 | 57318902 | A | G | 0.005743808         | YES |
| PGS000364_hmPOS_GRCh37 | 18 | 63657268 | C | G | 0.001616723         | NO  |
| PGS000364_hmPOS_GRCh37 | 18 | 63658175 | T | C | 0.001412633         | YES |
| PGS000364_hmPOS_GRCh37 | 18 | 66637488 | A | G | 0.009559737         | YES |
| PGS000364_hmPOS_GRCh37 | 18 | 67471154 | A | C | -0.001742552        | YES |
| PGS000364_hmPOS_GRCh37 | 18 | 67471483 | A | G | -0.014341836        | YES |
| PGS000364_hmPOS_GRCh37 | 18 | 71654492 | C | T | -0.005625996        | YES |
| PGS000364_hmPOS_GRCh37 | 19 | 3753874  | A | G | -0.001093354        | YES |
| PGS000364_hmPOS_GRCh37 | 19 | 3813013  | G | A | -0.000481795        | YES |
| PGS000364_hmPOS_GRCh37 | 19 | 3813684  | G | A | 0.008954201         | YES |
| PGS000364_hmPOS_GRCh37 | 19 | 3843896  | T | C | 0.000563974         | YES |
| PGS000364_hmPOS_GRCh37 | 19 | 6732852  | C | T | -0.01307661         | YES |
| PGS000364_hmPOS_GRCh37 | 19 | 6733545  | C | G | -0.013395931        | NO  |
| PGS000364_hmPOS_GRCh37 | 19 | 6734712  | C | T | -0.012856357        | YES |
| PGS000364_hmPOS_GRCh37 | 19 | 6737644  | A | G | -0.009808265        | YES |
| PGS000364_hmPOS_GRCh37 | 19 | 11124470 | G | C | 0.00010834          | NO  |
| PGS000364_hmPOS_GRCh37 | 19 | 11148934 | G | C | 0.000695539         | NO  |
| PGS000364_hmPOS_GRCh37 | 19 | 11148948 | G | A | 0.000690626         | YES |
| PGS000364_hmPOS_GRCh37 | 19 | 11153543 | C | T | 0.002836705         | YES |
| PGS000364_hmPOS_GRCh37 | 19 | 11153574 | T | C | 0.002867483         | YES |
| PGS000364_hmPOS_GRCh37 | 19 | 12423818 | C | G | 7.65609920956589e-6 | NO  |

|                        |    |          |   |   |              |     |
|------------------------|----|----------|---|---|--------------|-----|
| PGS000364_hmPOS_GRCh37 | 19 | 22710737 | T | C | 0.001630508  | YES |
| PGS000364_hmPOS_GRCh37 | 19 | 29904906 | G | A | 0.005344496  | YES |
| PGS000364_hmPOS_GRCh37 | 19 | 32477283 | T | C | -0.00284337  | YES |
| PGS000364_hmPOS_GRCh37 | 19 | 32481907 | A | G | -0.001915735 | YES |
| PGS000364_hmPOS_GRCh37 | 19 | 32482727 | C | T | -0.002088053 | YES |
| PGS000364_hmPOS_GRCh37 | 19 | 32483917 | A | C | -0.002117038 | YES |
| PGS000364_hmPOS_GRCh37 | 19 | 32485263 | A | C | -0.002115336 | YES |
| PGS000364_hmPOS_GRCh37 | 19 | 32489168 | A | G | -0.002123407 | YES |
| PGS000364_hmPOS_GRCh37 | 19 | 32489272 | G | C | -0.002150055 | NO  |
| PGS000364_hmPOS_GRCh37 | 19 | 32489923 | T | C | -0.002150618 | YES |
| PGS000364_hmPOS_GRCh37 | 19 | 32490507 | C | T | -0.002152072 | YES |
| PGS000364_hmPOS_GRCh37 | 19 | 32497463 | T | G | -0.002237191 | YES |
| PGS000364_hmPOS_GRCh37 | 19 | 34362298 | A | G | 0.015087517  | YES |
| PGS000364_hmPOS_GRCh37 | 19 | 34398808 | T | C | 0.011877746  | YES |
| PGS000364_hmPOS_GRCh37 | 19 | 34431555 | G | T | 0.012256034  | YES |
| PGS000364_hmPOS_GRCh37 | 19 | 34446444 | T | C | 0.008505154  | YES |
| PGS000364_hmPOS_GRCh37 | 19 | 44750883 | G | T | 0.015870341  | YES |
| PGS000364_hmPOS_GRCh37 | 19 | 44789598 | T | A | 0.015325737  | NO  |
| PGS000364_hmPOS_GRCh37 | 19 | 44820995 | A | G | 0.013272492  | YES |
| PGS000364_hmPOS_GRCh37 | 19 | 48170545 | G | T | -0.001286459 | YES |
| PGS000364_hmPOS_GRCh37 | 19 | 48200803 | T | C | -0.001397768 | YES |
| PGS000364_hmPOS_GRCh37 | 19 | 48201652 | C | G | -0.001097385 | NO  |
| PGS000364_hmPOS_GRCh37 | 19 | 51250181 | C | G | -0.002243428 | NO  |
| PGS000364_hmPOS_GRCh37 | 19 | 51420756 | T | G | 0.006278393  | YES |
| PGS000364_hmPOS_GRCh37 | 19 | 51588884 | C | T | 0.001419665  | YES |
| PGS000364_hmPOS_GRCh37 | 19 | 51590173 | T | C | 0.005042874  | YES |
| PGS000364_hmPOS_GRCh37 | 19 | 53124451 | A | G | 0.001999831  | YES |
| PGS000364_hmPOS_GRCh37 | 19 | 53153196 | A | C | 0.009408568  | YES |
| PGS000364_hmPOS_GRCh37 | 20 | 1997672  | C | T | 0.000352152  | YES |
| PGS000364_hmPOS_GRCh37 | 20 | 2000819  | C | T | 0.00087301   | YES |
| PGS000364_hmPOS_GRCh37 | 20 | 2001015  | G | A | 0.000265127  | YES |
| PGS000364_hmPOS_GRCh37 | 20 | 6727734  | G | C | -0.001083611 | NO  |
| PGS000364_hmPOS_GRCh37 | 20 | 6728586  | C | T | 0.006199537  | YES |
| PGS000364_hmPOS_GRCh37 | 20 | 6728704  | G | T | 0.006328897  | YES |
| PGS000364_hmPOS_GRCh37 | 20 | 6728762  | C | T | 0.006491301  | YES |
| PGS000364_hmPOS_GRCh37 | 20 | 6728807  | A | G | 0.005306528  | YES |
| PGS000364_hmPOS_GRCh37 | 20 | 6728966  | T | G | 0.002314402  | YES |
| PGS000364_hmPOS_GRCh37 | 20 | 6729461  | C | T | 0.001854681  | YES |
| PGS000364_hmPOS_GRCh37 | 20 | 6729499  | A | G | 0.001813161  | YES |
| PGS000364_hmPOS_GRCh37 | 20 | 6729560  | C | T | 0.001771664  | YES |
| PGS000364_hmPOS_GRCh37 | 20 | 6729571  | A | G | 0.001771356  | YES |
| PGS000364_hmPOS_GRCh37 | 20 | 6729734  | G | C | 0.001525671  | NO  |
| PGS000364_hmPOS_GRCh37 | 20 | 6729789  | C | T | 0.001532815  | YES |
| PGS000364_hmPOS_GRCh37 | 20 | 6730079  | T | C | 0.000872157  | YES |
| PGS000364_hmPOS_GRCh37 | 20 | 6730405  | A | G | 0.000859983  | YES |
| PGS000364_hmPOS_GRCh37 | 20 | 6730911  | T | A | 0.000702243  | NO  |
| PGS000364_hmPOS_GRCh37 | 20 | 18096932 | A | G | 0.002051616  | YES |
| PGS000364_hmPOS_GRCh37 | 20 | 18111708 | C | T | 0.003300859  | YES |
| PGS000364_hmPOS_GRCh37 | 20 | 20593272 | T | G | 0.000460807  | YES |
| PGS000364_hmPOS_GRCh37 | 20 | 24878525 | T | C | 0.017264221  | NO  |
| PGS000364_hmPOS_GRCh37 | 20 | 24892552 | A | G | 0.006817007  | YES |
| PGS000364_hmPOS_GRCh37 | 20 | 24893707 | G | A | 0.005649159  | YES |
| PGS000364_hmPOS_GRCh37 | 20 | 24894067 | T | C | 0.005656302  | YES |
| PGS000364_hmPOS_GRCh37 | 20 | 24894448 | G | C | 0.00566937   | NO  |
| PGS000364_hmPOS_GRCh37 | 20 | 24896365 | A | G | 0.00696608   | YES |
| PGS000364_hmPOS_GRCh37 | 20 | 24897406 | C | T | 0.004323774  | YES |
| PGS000364_hmPOS_GRCh37 | 20 | 44223600 | C | G | 0.007082033  | NO  |
| PGS000364_hmPOS_GRCh37 | 20 | 44224978 | A | G | 0.00832963   | YES |
| PGS000364_hmPOS_GRCh37 | 20 | 44231598 | T | G | 0.008114658  | YES |
| PGS000364_hmPOS_GRCh37 | 20 | 44232288 | T | C | 0.008114784  | YES |
| PGS000364_hmPOS_GRCh37 | 20 | 44234781 | T | G | 0.00811491   | YES |
| PGS000364_hmPOS_GRCh37 | 20 | 44235043 | T | C | 0.008062202  | YES |
| PGS000364_hmPOS_GRCh37 | 20 | 44235865 | G | T | 0.008067378  | YES |



|                        |    |          |   |   |              |     |
|------------------------|----|----------|---|---|--------------|-----|
| PGS000364_hmPOS_GRCh37 | 20 | 44238429 | T | G | 0.008044962  | YES |
| PGS000364_hmPOS_GRCh37 | 20 | 44238741 | G | T | 0.00480752   | YES |
| PGS000364_hmPOS_GRCh37 | 20 | 44242565 | G | T | 0.007854946  | YES |
| PGS000364_hmPOS_GRCh37 | 20 | 44242581 | C | T | 0.007855174  | YES |
| PGS000364_hmPOS_GRCh37 | 20 | 44242789 | C | T | 0.004981452  | YES |
| PGS000364_hmPOS_GRCh37 | 20 | 44243429 | A | G | 0.008035931  | YES |
| PGS000364_hmPOS_GRCh37 | 20 | 44244511 | C | T | 0.008059091  | YES |
| PGS000364_hmPOS_GRCh37 | 20 | 44245927 | G | C | 0.008059249  | NO  |
| PGS000364_hmPOS_GRCh37 | 20 | 44247546 | G | A | 0.006953514  | YES |
| PGS000364_hmPOS_GRCh37 | 20 | 44247693 | G | T | 0.003979487  | YES |
| PGS000364_hmPOS_GRCh37 | 20 | 44248435 | A | G | 0.006872379  | YES |
| PGS000364_hmPOS_GRCh37 | 20 | 44248596 | T | C | 0.006813593  | YES |
| PGS000364_hmPOS_GRCh37 | 20 | 44248711 | A | G | 0.006840063  | YES |
| PGS000364_hmPOS_GRCh37 | 20 | 44249253 | A | T | 0.006822946  | NO  |
| PGS000364_hmPOS_GRCh37 | 20 | 44250199 | G | A | 0.00678427   | YES |
| PGS000364_hmPOS_GRCh37 | 20 | 44251629 | A | G | 0.006863902  | YES |
| PGS000364_hmPOS_GRCh37 | 20 | 44253195 | A | C | 0.006885423  | YES |
| PGS000364_hmPOS_GRCh37 | 20 | 44256591 | C | T | 0.003905448  | YES |
| PGS000364_hmPOS_GRCh37 | 20 | 44257650 | C | T | 0.004699073  | YES |
| PGS000364_hmPOS_GRCh37 | 20 | 44257652 | C | T | 0.004639149  | YES |
| PGS000364_hmPOS_GRCh37 | 20 | 44258743 | G | A | 0.003896516  | YES |
| PGS000364_hmPOS_GRCh37 | 20 | 44258932 | C | T | 0.003896547  | YES |
| PGS000364_hmPOS_GRCh37 | 20 | 44259490 | A | G | 0.003910094  | YES |
| PGS000364_hmPOS_GRCh37 | 20 | 44259673 | T | G | 0.006790646  | YES |
| PGS000364_hmPOS_GRCh37 | 20 | 44261397 | T | C | 0.003916072  | YES |
| PGS000364_hmPOS_GRCh37 | 20 | 44261643 | T | C | 0.003917591  | YES |
| PGS000364_hmPOS_GRCh37 | 20 | 44262911 | C | A | 0.006805043  | YES |
| PGS000364_hmPOS_GRCh37 | 20 | 44268065 | G | A | 0.003700878  | YES |
| PGS000364_hmPOS_GRCh37 | 20 | 44268779 | C | G | 0.006648614  | NO  |
| PGS000364_hmPOS_GRCh37 | 20 | 44269042 | G | A | 0.003712633  | YES |
| PGS000364_hmPOS_GRCh37 | 20 | 44269982 | C | T | 0.003746501  | YES |
| PGS000364_hmPOS_GRCh37 | 20 | 44270415 | G | A | 0.003773862  | YES |
| PGS000364_hmPOS_GRCh37 | 20 | 44271254 | A | G | 0.003741217  | YES |
| PGS000364_hmPOS_GRCh37 | 20 | 44272936 | A | C | 0.003993645  | YES |
| PGS000364_hmPOS_GRCh37 | 20 | 44272944 | T | C | 0.004009091  | YES |
| PGS000364_hmPOS_GRCh37 | 20 | 44277111 | A | G | 0.003799149  | YES |
| PGS000364_hmPOS_GRCh37 | 20 | 44278346 | C | T | 0.006427847  | YES |
| PGS000364_hmPOS_GRCh37 | 20 | 44279768 | G | A | 0.007119451  | YES |
| PGS000364_hmPOS_GRCh37 | 20 | 44288068 | C | T | 0.007116125  | YES |
| PGS000364_hmPOS_GRCh37 | 20 | 44311598 | G | A | 0.00705187   | YES |
| PGS000364_hmPOS_GRCh37 | 20 | 44312991 | T | C | 0.007027614  | YES |
| PGS000364_hmPOS_GRCh37 | 20 | 44322500 | T | C | 0.007346221  | YES |
| PGS000364_hmPOS_GRCh37 | 20 | 44324215 | G | A | 0.007107301  | YES |
| PGS000364_hmPOS_GRCh37 | 20 | 44326104 | G | A | 0.007143468  | YES |
| PGS000364_hmPOS_GRCh37 | 20 | 44327802 | A | G | 0.002645131  | YES |
| PGS000364_hmPOS_GRCh37 | 20 | 44330128 | T | C | 0.002754404  | YES |
| PGS000364_hmPOS_GRCh37 | 20 | 54547988 | T | C | 0.002778417  | YES |
| PGS000364_hmPOS_GRCh37 | 21 | 19772457 | G | A | 0.002866212  | YES |
| PGS000364_hmPOS_GRCh37 | 21 | 27414936 | A | G | -0.000345527 | YES |
| PGS000364_hmPOS_GRCh37 | 21 | 27417001 | C | A | -0.000305238 | YES |
| PGS000364_hmPOS_GRCh37 | 21 | 27422395 | T | A | -0.002106274 | NO  |
| PGS000364_hmPOS_GRCh37 | 21 | 27425859 | C | G | -0.004306725 | NO  |
| PGS000364_hmPOS_GRCh37 | 21 | 32217621 | C | T | 0.000801404  | YES |
| PGS000364_hmPOS_GRCh37 | 21 | 32219380 | C | T | 0.000362774  | YES |
| PGS000364_hmPOS_GRCh37 | 21 | 32219570 | G | A | 0.000364953  | YES |
| PGS000364_hmPOS_GRCh37 | 21 | 32219923 | C | T | 0.000239045  | YES |
| PGS000364_hmPOS_GRCh37 | 21 | 32221534 | A | T | 0.000313859  | NO  |
| PGS000364_hmPOS_GRCh37 | 21 | 32223082 | C | T | 0.000241642  | YES |
| PGS000364_hmPOS_GRCh37 | 21 | 32225713 | T | A | 0.000308485  | NO  |
| PGS000364_hmPOS_GRCh37 | 21 | 32225824 | C | A | 0.000224154  | YES |
| PGS000364_hmPOS_GRCh37 | 21 | 32227016 | C | G | 0.00030567   | NO  |
| PGS000364_hmPOS_GRCh37 | 21 | 32228253 | A | G | 0.000342035  | YES |
| PGS000364_hmPOS_GRCh37 | 21 | 32228556 | A | G | 0.000311819  | YES |

|                        |    |          |   |   |              |     |
|------------------------|----|----------|---|---|--------------|-----|
| PGS000364_hmPOS_GRCh37 | 21 | 32229736 | T | G | 0.000293355  | YES |
| PGS000364_hmPOS_GRCh37 | 21 | 32233838 | T | A | 0.000487662  | NO  |
| PGS000364_hmPOS_GRCh37 | 21 | 32235779 | T | C | 0.000570481  | YES |
| PGS000364_hmPOS_GRCh37 | 21 | 32237062 | T | C | 0.000545466  | YES |
| PGS000364_hmPOS_GRCh37 | 21 | 32237708 | T | C | 0.000491435  | YES |
| PGS000364_hmPOS_GRCh37 | 21 | 32237833 | A | T | 0.000567019  | NO  |
| PGS000364_hmPOS_GRCh37 | 21 | 32239665 | C | A | 0.002027585  | YES |
| PGS000364_hmPOS_GRCh37 | 21 | 32242221 | A | C | 0.000392369  | YES |
| PGS000364_hmPOS_GRCh37 | 21 | 32242431 | T | A | 0.00025601   | NO  |
| PGS000364_hmPOS_GRCh37 | 21 | 32242774 | G | A | 0.000409485  | YES |
| PGS000364_hmPOS_GRCh37 | 21 | 32243319 | C | T | 0.000268644  | YES |
| PGS000364_hmPOS_GRCh37 | 21 | 32243997 | A | G | 0.000487342  | YES |
| PGS000364_hmPOS_GRCh37 | 21 | 32244060 | A | T | 0.000502017  | NO  |
| PGS000364_hmPOS_GRCh37 | 21 | 32245247 | T | C | 0.000762118  | YES |
| PGS000364_hmPOS_GRCh37 | 21 | 32245923 | C | T | 0.000579143  | YES |
| PGS000364_hmPOS_GRCh37 | 21 | 32246233 | C | G | 0.000473927  | NO  |
| PGS000364_hmPOS_GRCh37 | 21 | 32246912 | C | T | 0.000589246  | YES |
| PGS000364_hmPOS_GRCh37 | 21 | 32248452 | A | G | 0.001058911  | YES |
| PGS000364_hmPOS_GRCh37 | 21 | 32248498 | G | A | 0.000852894  | YES |
| PGS000364_hmPOS_GRCh37 | 21 | 32250952 | C | T | 0.000886218  | YES |
| PGS000364_hmPOS_GRCh37 | 21 | 32252110 | A | T | 0.001007583  | NO  |
| PGS000364_hmPOS_GRCh37 | 21 | 32252137 | T | G | 0.001275042  | YES |
| PGS000364_hmPOS_GRCh37 | 21 | 32252565 | T | G | 0.001166356  | YES |
| PGS000364_hmPOS_GRCh37 | 21 | 32253629 | T | C | 0.001884524  | YES |
| PGS000364_hmPOS_GRCh37 | 21 | 32253966 | C | T | 0.001434148  | YES |
| PGS000364_hmPOS_GRCh37 | 21 | 35042415 | C | A | -0.00151282  | YES |
| PGS000364_hmPOS_GRCh37 | 21 | 37601762 | G | C | 0.003605164  | NO  |
| PGS000364_hmPOS_GRCh37 | 21 | 39955226 | A | C | 0.001809284  | YES |
| PGS000364_hmPOS_GRCh37 | 21 | 40318829 | A | G | 0.009711648  | YES |
| PGS000364_hmPOS_GRCh37 | 21 | 40324223 | C | T | -0.001837455 | YES |
| PGS000364_hmPOS_GRCh37 | 21 | 40325715 | A | T | -0.004114253 | NO  |
| PGS000364_hmPOS_GRCh37 | 21 | 40328320 | G | T | -0.001677184 | YES |
| PGS000364_hmPOS_GRCh37 | 21 | 40330208 | T | C | -0.006960639 | YES |
| PGS000364_hmPOS_GRCh37 | 21 | 42027045 | T | C | 0.0057356    | YES |
| PGS000364_hmPOS_GRCh37 | 21 | 47973610 | A | G | 0.005652494  | YES |
| PGS000364_hmPOS_GRCh37 | 21 | 47974388 | G | C | 0.006734096  | NO  |
| PGS000364_hmPOS_GRCh37 | 21 | 47980913 | T | G | -0.005407249 | YES |
| PGS000364_hmPOS_GRCh37 | 21 | 47980948 | C | G | 0.009179307  | NO  |
| PGS000364_hmPOS_GRCh37 | 21 | 47982040 | T | C | 0.007310141  | YES |
| PGS000364_hmPOS_GRCh37 | 21 | 47982363 | A | G | 6.61274E-05  | YES |
| PGS000364_hmPOS_GRCh37 | 21 | 47982738 | A | G | 0.005016136  | YES |
| PGS000364_hmPOS_GRCh37 | 21 | 47983543 | T | C | 0.006936028  | YES |
| PGS000364_hmPOS_GRCh37 | 21 | 47988364 | T | C | 0.007507896  | YES |
| PGS000364_hmPOS_GRCh37 | 22 | 17675324 | T | C | -0.013531696 | YES |
| PGS000364_hmPOS_GRCh37 | 22 | 25217890 | T | G | 0.004517201  | YES |
| PGS000364_hmPOS_GRCh37 | 22 | 27297757 | T | C | 0.00093769   | YES |
| PGS000364_hmPOS_GRCh37 | 22 | 36065885 | A | G | 0.004887987  | YES |
| PGS000364_hmPOS_GRCh37 | 22 | 39575221 | G | A | -0.008383493 | YES |
| PGS000364_hmPOS_GRCh37 | 22 | 39629609 | A | G | -0.005544208 | YES |
| PGS000364_hmPOS_GRCh37 | 22 | 47221990 | G | T | 0.004763435  | YES |
| PGS000364_hmPOS_GRCh37 | 22 | 49599953 | T | G | 0.003587219  | YES |

Abbreviations: SNP, Single nucleotide polymorphism; PRS, polygenic risk score.

Total number of variants: 2001

Matched, n (%): 1682 (84.06%)

Exclusions due to ambiguously matched, n (%): 312 (15.59%)

Exclusions due to unmatched, n (%): 7 (0.35%)
