# Supplementary material for: Genetic Risk, Health-Associated Lifestyle, and Risk of Early-onset Total Cancer and Breast Cancer
Source: PubMed Central journal article supplement — medRxiv. 2024 Apr 6:2024.04.04.24305361. Preprint. [Version 1] doi: 10.1101/2024.04.04.24305361 (PMC11023660; doi:10.1101/2024.04.04.24305361), 2024-04-06
Supplement: NIHPP2024.04.04.24305361V1-supplement-1.pdf [file NIHPP2024.04.04.24305361V1-supplement-1.pdf]

## Supplement 1

### (Major Supplementary Tables)

#### Genetic Risk, Health-Associated Lifestyle, and Risk of Early-onset Total Cancer and Breast Cancer

Yin Zhang, Sara Lindström, Peter Kraft, Yuxi Liu

##### **eTable 1**

List of published cancer site-specific PRSs included in the lasso regression in females, and list of cancer site-specific PRSs selected from the lasso regression for the development of the female-specific composite total cancer PRS

##### **eTable 2**

List of published cancer site-specific PRSs included in the lasso regression in males, and list of cancer site-specific PRSs selected from the lasso regression for the development of the male-specific composite total cancer PRS

##### **eTable 3**

Summary of early-onset cancer spectrum in females and males, showcasing cancers with published site-specific PRSs qualified for inclusion in the lasso regression.

##### **eTable 4**

Components of female-specific HLS and male-specific HLS

##### **eTable 5**

Characteristics of female participants (N=34383) at baseline according to breast cancer PRS

##### **eTable 6**

Characteristics of female participants (N=34383) at baseline according to female-specific HLS

##### **eTable 7**

Characteristics of male participants (N=31925) at baseline according to male-specific HLS

**eTable 1. List of published cancer site-specific PRSs included in the lasso regression in females, and list of cancer site-specific PRSs selected from the lasso regression for the development of the female-specific composite total cancer PRS**

| Cancer Types         | Polygenic Score ID & Name (PGS catalog) included in the lasso regression <sup>a</sup>       | Number of SNPs | Publication                                                                                        | PMID                 | Selected from the lasso regression |
|----------------------|---------------------------------------------------------------------------------------------|----------------|----------------------------------------------------------------------------------------------------|----------------------|------------------------------------|
| Breast               | <u>PGS000004 (PRS313_BC)</u> <sup>b</sup>                                                   | 313            | <u>Mavaddat N et al. Am J Hum Genet (2018)</u>                                                     | 30554720             | Yes                                |
| Melanoma             | <u>PGS000790 (CC_Melanoma_IV)</u>                                                           | 24             | <u>Kachuri L et al. Nat Commun (2020)</u>                                                          | 33247094             | No                                 |
| Colorectum *         | <u>PGS002252 (PRS_CRC)</u>                                                                  | 141            | <u>Archambault AN et al. J Natl Cancer Inst (2022)</u><br><u>Huyghe JR et al. Nat Genet (2019)</u> | 35026030<br>30510241 | No                                 |
| Non-Hodgkin lymphoma | <u>PGS000791 (CC_NHL_IV)</u>                                                                | 19             | <u>Kachuri L et al. Nat Commun (2020)</u>                                                          | 33247094             | No                                 |
| Ovary                | <u>PGS003394 (PRS_Stepwise)</u>                                                             | 36             | <u>Dareng EO et al. Eur J Hum Genet (2022)</u>                                                     | 35027648             | No                                 |
| Brain *              | <u>PGS000624 (PRSWEB_PHECODE191.11_GWAS-Catalog-r2019-05-03-X191.11_PT_UKB_20200608)</u>    | 5              | <u>Fritsche LG et al. Am J Hum Genet (2020)</u>                                                    | 32991828             | No                                 |
| Head and neck        | <u>PGS000792 (CC_Oral_IV)</u>                                                               | 14             | <u>Kachuri L et al. Nat Commun (2020)</u>                                                          | 33247094             | No                                 |
| Lung                 | <u>PGS000740 (PRS128_LC)</u>                                                                | 128            | <u>Hung RJ et al. Cancer Res (2021)</u>                                                            | 33472890             | Yes                                |
| Endometrium          | <u>PGS000786 (CC_Endo_IV)</u>                                                               | 9              | <u>Kachuri L et al. Nat Commun (2020)</u>                                                          | 33247094             | No                                 |
| Thyroid              | <u>PGS000797 (CC_Thyroid_IV)</u>                                                            | 12             | <u>Kachuri L et al. Nat Commun (2020)</u>                                                          | 33247094             | No                                 |
| Kidney               | <u>PGS000787 (CC_Kidney_IV)</u>                                                             | 19             | <u>Kachuri L et al. Nat Commun (2020)</u>                                                          | 33247094             | No                                 |
| Multiple myeloma *   | <u>PGS000653 (PRSWEB_PHECODE204.4_GWAS-Catalog-r2019-05-03-X204.4_P_5e-08_UKB_20200608)</u> | 22             | <u>Fritsche LG et al. Am J Hum Genet (2020)</u>                                                    | 32991828             | Yes                                |
| Cervix               | <u>PGS000784 (CC_Cervix_IV)</u>                                                             | 10             | <u>Kachuri L et al. Nat Commun (2020)</u>                                                          | 33247094             | No                                 |

|                    |                                                                                        |      |                                                                                     |                      |     |
|--------------------|----------------------------------------------------------------------------------------|------|-------------------------------------------------------------------------------------|----------------------|-----|
| Pancreas           | <u>PGS000794 (CC_Pancreas_IV)</u>                                                      | 22   | <u>Kachuri L et al. Nat Commun (2020)</u>                                           | 33247094             | No  |
| Stomach            | <u>PGS002299 (PRS3_gastric)</u>                                                        | 3    | <u>Choi J et al. Int J Cancer (2020)</u><br><u>Helgason et al. Nat Genet (2015)</u> | 32588423<br>26098866 | Yes |
| Lymphoid leukemia  | <u>PGS000788 (CC_LL_IV)</u>                                                            | 75   | <u>Kachuri L et al. Nat Commun (2020)</u>                                           | 33247094             | No  |
| Esophagus          | <u>PGS000364 (PRSWEB_PHECODE150_C15_LASSOSUM_MGI_20200608)</u>                         | 2001 | <u>Fritsche LG et al. Am J Hum Genet (2020)</u>                                     | 32991828             | No  |
| Hodgkin's lymphoma | <u>PGS000639 (PRSWEB_PHECODE201_GWAS-Catalog-r2019-05-03-X201_PT_MGI_20200608)</u>     | 20   | <u>Fritsche LG et al. Am J Hum Genet (2020)</u>                                     | 32991828             | No  |
| Trachea *          | <u>PGS000392 (PRSWEB_PHECODE165.1_GWAS-Catalog-r2019-05-03-X165.1_PT_UKB_20200608)</u> | 19   | <u>Fritsche LG et al. Am J Hum Genet (2020)</u>                                     | 32991828             | No  |

Abbreviations: PRS, polygenic risk score; GRCh37, Genome Reference Consortium Human Build 37.

<sup>a</sup> Published cancer site-specific PRSs included in the lasso regression were selected based on their training sample size, developing methods, test-set performance, possibility of overfit (i.e. training sample should not include UK Biobank), and the availability of SNPs and weights.

<sup>b</sup> PGS000004 (PRS313\_BC) was used specifically in analyses of breast cancer PRS and early-onset breast cancer among females.

\* UK Biobank was included in the training set.

**eTable 2. List of published cancer site-specific PRSs included in the lasso regression in males, and list of cancer site-specific PRSs selected from the lasso regression for the development of the male-specific composite total cancer PRS**

| Cancer Types         | Polygenic Score ID & Name (PGS catalog) included in the lasso regression <sup>a</sup>       | Number of SNPs | Publication                                                                                        | PMID                 | Selected from the lasso regression |
|----------------------|---------------------------------------------------------------------------------------------|----------------|----------------------------------------------------------------------------------------------------|----------------------|------------------------------------|
| Breast               | <u>PGS000004 (PRS313_BC)</u> <sup>b</sup>                                                   | 313            | <u>Mavaddat N et al. Am J Hum Genet (2018)</u>                                                     | 30554720             | No                                 |
| Melanoma             | <u>PGS000790 (CC_Melanoma_IV)</u>                                                           | 24             | <u>Kachuri L et al. Nat Commun (2020)</u>                                                          | 33247094             | Yes                                |
| Colorectum *         | <u>PGS002252 (PRS_CRC)</u>                                                                  | 141            | <u>Archambault AN et al. J Natl Cancer Inst (2022)</u><br><u>Huyghe JR et al. Nat Genet (2019)</u> | 35026030<br>30510241 | No                                 |
| Non-Hodgkin lymphoma | <u>PGS000791 (CC_NHL_IV)</u>                                                                | 19             | <u>Kachuri L et al. Nat Commun (2020)</u>                                                          | 33247094             | No                                 |
| Prostate             | <u>PGS000662 (GRS.PCa.269)</u>                                                              | 269            | <u>Conti DV et al. Nat Genet (2021)</u>                                                            | 33398198             | No                                 |
| Brain *              | <u>PGS000624 (PRSWEB_PHECODE191.11_GWAS-Catalog-r2019-05-03-X191.11_PT_UKB_20200608)</u>    | 5              | <u>Fritsche LG et al. Am J Hum Genet (2020)</u>                                                    | 32991828             | No                                 |
| Head and neck        | <u>PGS000792 (CC_Oral_IV)</u>                                                               | 14             | <u>Kachuri L et al. Nat Commun (2020)</u>                                                          | 33247094             | No                                 |
| Lung                 | <u>PGS000740 (PRS128_LC)</u>                                                                | 128            | <u>Hung RJ et al. Cancer Res (2021)</u>                                                            | 33472890             | Yes                                |
| Testis               | <u>PGS000796 (CC_Testis_IV)</u>                                                             | 52             | <u>Kachuri L et al. Nat Commun (2020)</u>                                                          | 33247094             | No                                 |
| Thyroid              | <u>PGS000797 (CC_Thyroid_IV)</u>                                                            | 12             | <u>Kachuri L et al. Nat Commun (2020)</u>                                                          | 33247094             | No                                 |
| Kidney               | <u>PGS000787 (CC_Kidney_IV)</u>                                                             | 19             | <u>Kachuri L et al. Nat Commun (2020)</u>                                                          | 33247094             | Yes                                |
| Multiple myeloma *   | <u>PGS000653 (PRSWEB_PHECODE204.4_GWAS-Catalog-r2019-05-03-X204.4_P_5e-08_UKB_20200608)</u> | 22             | <u>Fritsche LG et al. Am J Hum Genet (2020)</u>                                                    | 32991828             | No                                 |
| Pancreas             | <u>PGS000794 (CC_Pancreas_IV)</u>                                                           | 22             | <u>Kachuri L et al. Nat Commun (2020)</u>                                                          | 33247094             | Yes                                |
| Stomach              | <u>PGS002299 (PRS3_gastric)</u>                                                             | 3              | <u>Choi J et al. Int J Cancer (2020)</u>                                                           | 32588423<br>26098866 | No                                 |

|                    |                                                                                    |      |                                                 |          |    |
|--------------------|------------------------------------------------------------------------------------|------|-------------------------------------------------|----------|----|
|                    |                                                                                    |      | <u>Helgason et al. Nat Genet (2015)</u>         |          |    |
| Lymphoid leukemia  | <u>PGS000788 (CC LL IV)</u>                                                        | 75   | <u>Kachuri L et al. Nat Commun (2020)</u>       | 33247094 | No |
| Bladder            | <u>PGS000782 (CC Bladder IV)</u>                                                   | 15   | <u>Kachuri L et al. Nat Commun (2020)</u>       | 33247094 | No |
| Esophagus          | <u>PGS000364 (PRSWEB_PHECODE150_C15_LASSOSUM_MGI_20200608)</u>                     | 2001 | <u>Fritsche LG et al. Am J Hum Genet (2020)</u> | 32991828 | No |
| Hodgkin's lymphoma | <u>PGS000639 (PRSWEB_PHECODE201_GWAS-Catalog-r2019-05-03-X201_PT_MGI_20200608)</u> | 20   | <u>Fritsche LG et al. Am J Hum Genet (2020)</u> | 32991828 | No |
| Larynx             | <u>PGS000362 (PRSWEB_PHECODE149.4_UKBB-SAIGE-HRC-X149.4_PT_MGI_20200608)</u>       | 53   | <u>Fritsche LG et al. Am J Hum Genet (2020)</u> | 32991828 | No |

Abbreviations: PRS, polygenic risk score; GRCh37, Genome Reference Consortium Human Build 37.

<sup>a</sup> Published cancer site-specific PRSs included in the lasso regression were selected based on their training sample size, developing methods, test-set performance, possibility of overfit (i.e. training sample should not include UK Biobank), and the availability of SNPs and weights.

<sup>b</sup> Breast cancer PRS was included in the lasso regression in males because there was one case of early-onset breast cancer documented in males.

\* UK Biobank was included in the training set.

**eTable 3. Summary of early-onset cancer spectrum in females and males, showcasing cancers with published site-specific PRSs qualified for inclusion in the lasso regression**

| <b>Cancer Types with Published Site-specific PRSs qualified for inclusion in the lasso regression</b> | <b>Number of Cases (jn females)</b> | <b>Number of Cases (in males)</b> | <b>Number of Cases (in the total study population)</b> |
|-------------------------------------------------------------------------------------------------------|-------------------------------------|-----------------------------------|--------------------------------------------------------|
| Breast                                                                                                | 386                                 | 1                                 | 387                                                    |
| Melanoma                                                                                              | 60                                  | 36                                | 96                                                     |
| Colorectum                                                                                            | 23                                  | 28                                | 51                                                     |
| Brain                                                                                                 | 11                                  | 19                                | 30                                                     |
| Non-Hodgkin lymphoma                                                                                  | 7                                   | 22                                | 29                                                     |
| Prostate                                                                                              | 0                                   | 28                                | 28                                                     |
| Ovary                                                                                                 | 27                                  | 0                                 | 27                                                     |
| Testis                                                                                                | 0                                   | 22                                | 22                                                     |
| Kidney                                                                                                | 7                                   | 9                                 | 16                                                     |
| Head and neck                                                                                         | 7                                   | 9                                 | 16                                                     |
| Lung                                                                                                  | 8                                   | 7                                 | 15                                                     |
| Endometrium                                                                                           | 12                                  | 0                                 | 12                                                     |
| Thyroid                                                                                               | 9                                   | 3                                 | 12                                                     |
| Multiple myeloma                                                                                      | 4                                   | 8                                 | 12                                                     |
| Lymphoid leukemia                                                                                     | 4                                   | 5                                 | 9                                                      |
| Cervix                                                                                                | 8                                   | 0                                 | 8                                                      |
| Pancreas                                                                                              | 5                                   | 3                                 | 8                                                      |
| Stomach                                                                                               | 2                                   | 5                                 | 7                                                      |
| Bladder                                                                                               | 0                                   | 6                                 | 6                                                      |
| Esophagus                                                                                             | 1                                   | 2                                 | 3                                                      |
| Hodgkin's lymphoma                                                                                    | 2                                   | 1                                 | 3                                                      |
| Larynx                                                                                                | 0                                   | 3                                 | 3                                                      |
| Trachea                                                                                               | 1                                   | 0                                 | 1                                                      |
|                                                                                                       |                                     |                                   |                                                        |
| <b>Sum</b>                                                                                            | <b>584</b>                          | <b>217</b>                        | <b>801</b>                                             |
| Others                                                                                                | 236                                 | 210                               | 446                                                    |
|                                                                                                       |                                     |                                   |                                                        |
| <b>Total</b>                                                                                          | <b>820</b>                          | <b>427</b>                        | <b>1,247</b>                                           |

**eTable 4. Components of female-specific HLS and male-specific HLS**

| <b>Components</b>                    | <b>Categories</b>                                                                                                                                                                                                                                                                                                                                                                                                                                                                                                                                                                                                                                                                                                                                                                                                  | <b>Score assignments</b>                                                                                                                                                                                                                                                                                                                                                                                                                                                                                                                                                                                                                                                                                                                                                                                                                             |
|--------------------------------------|--------------------------------------------------------------------------------------------------------------------------------------------------------------------------------------------------------------------------------------------------------------------------------------------------------------------------------------------------------------------------------------------------------------------------------------------------------------------------------------------------------------------------------------------------------------------------------------------------------------------------------------------------------------------------------------------------------------------------------------------------------------------------------------------------------------------|------------------------------------------------------------------------------------------------------------------------------------------------------------------------------------------------------------------------------------------------------------------------------------------------------------------------------------------------------------------------------------------------------------------------------------------------------------------------------------------------------------------------------------------------------------------------------------------------------------------------------------------------------------------------------------------------------------------------------------------------------------------------------------------------------------------------------------------------------|
| <b>Smoking status</b>                | Current smoker<br>Others                                                                                                                                                                                                                                                                                                                                                                                                                                                                                                                                                                                                                                                                                                                                                                                           | <b>Smoking score</b><br>1 for current smoker<br>0 for others                                                                                                                                                                                                                                                                                                                                                                                                                                                                                                                                                                                                                                                                                                                                                                                         |
| <b>BMI (males only) <sup>a</sup></b> | 18.5≤ to <25 kg/m <sup>2</sup><br>Others                                                                                                                                                                                                                                                                                                                                                                                                                                                                                                                                                                                                                                                                                                                                                                           | <b>BMI score</b><br>0 for 18.5≤ to <25 kg/m <sup>2</sup><br>1 for others                                                                                                                                                                                                                                                                                                                                                                                                                                                                                                                                                                                                                                                                                                                                                                             |
| <b>Physical activity</b>             | Met the guidelines <sup>b</sup><br>Didn't meet the guidelines <sup>b</sup>                                                                                                                                                                                                                                                                                                                                                                                                                                                                                                                                                                                                                                                                                                                                         | <b>Physical activity score</b><br>0 for met the guidelines <sup>b</sup><br>1 for didn't meet the guidelines <sup>b</sup>                                                                                                                                                                                                                                                                                                                                                                                                                                                                                                                                                                                                                                                                                                                             |
| <b>Alcohol consumption</b>           | Never<br>Others                                                                                                                                                                                                                                                                                                                                                                                                                                                                                                                                                                                                                                                                                                                                                                                                    | <b>Alcohol intake score</b><br>0 for never<br>1 for others                                                                                                                                                                                                                                                                                                                                                                                                                                                                                                                                                                                                                                                                                                                                                                                           |
| <b>Diet</b>                          | <p><b>Fruit and vegetable intake</b><br/>                     &lt;3 servings/day<br/>                     ≥3 to &lt;5 servings/day<br/>                     ≥5 servings/day</p> <p><i>*Amount per serving:</i><br/>                     Fresh fruit: 1 piece<br/>                     Dried fruit: 5 pieces<br/>                     Cooked vegetables: 3 heaped tablespoons<br/>                     Salad/raw vegetables: 3 heaped tablespoons</p> <p><b>Whole grain intake</b><br/>                     &lt;2 servings/day<br/>                     ≥2 to &lt;5.5 servings/day<br/>                     ≥5.5 servings/day</p> <p><i>*Amount per serving:</i><br/>                     Cereal: 1 bowl<br/>                     Whole-meal bread: 1 slice<br/>                     Whole-grain bread: 1 slice</p> | <p><b>Fruit and vegetable intake</b><br/>                     1 for &lt;3 servings/day<br/>                     0.5 for ≥3 to &lt;5 servings/day<br/>                     0 for ≥5 servings/day</p> <p><b>Whole grain intake</b><br/>                     1 for &lt;2 servings/day<br/>                     0.5 for ≥2 to &lt;5.5 servings/day<br/>                     0 for ≥5.5 servings/day</p> <p><b>Red and processed meat intake</b><br/>                     1 for ≥4 times/week<br/>                     0.5 for ≥2 to &lt;4 times/week<br/>                     0 for &lt;2 times/week</p> <p><b>Diet score</b><br/>                     (Fruit and vegetable intake score +<br/>                     Whole grain intake score +<br/>                     Red and processed meat intake score) / 3<br/>                     1 for ≥0.5</p> |

|                                                                                                                                                                                                                                                                                                      |                                                                                                                                                                                                                                                                                                                            |               |
|------------------------------------------------------------------------------------------------------------------------------------------------------------------------------------------------------------------------------------------------------------------------------------------------------|----------------------------------------------------------------------------------------------------------------------------------------------------------------------------------------------------------------------------------------------------------------------------------------------------------------------------|---------------|
|                                                                                                                                                                                                                                                                                                      | <i>Brown bread: 1 slice</i><br><br><b><i>Red and processed meat intake</i></b><br>$\geq 4$ times/week<br>$\geq 2$ to $< 4$ times/week<br>$< 2$ times/week                                                                                                                                                                  | 0 for $< 0.5$ |
| <b>Total Score</b>                                                                                                                                                                                                                                                                                   |                                                                                                                                                                                                                                                                                                                            |               |
| <u><b>Female-specific HLS</b></u><br>= <i>Smoking score</i> + <i>Physical activity score</i><br>+ <i>Alcohol intake score</i> + <i>Diet score</i><br><br>Ranging from 0 to 4, with higher scores indicating an unhealthier lifestyle.<br><br>Healthy: 0 to 1<br>Intermediate: 2 to 3<br>Unhealthy: 4 | <u><b>Male-specific HLS</b></u><br>= <i>Smoking score</i> + <i>BMI score</i> + <i>Physical activity score</i><br>+ <i>Alcohol intake score</i> + <i>Diet score</i><br><br>Ranging from 0 to 5, with higher scores indicating an unhealthier lifestyle.<br><br>Healthy: 0 to 1<br>Intermediate: 2 to 3<br>Unhealthy: 4 to 5 |               |

Abbreviations: HLS, health-associated lifestyle score; BMI, body mass index.

<sup>a</sup> BMI was not included as a component of female-specific HLS due to the widely recognized inverse association of BMI with the risk of early-onset/premenopausal breast cancer and the fact that early-onset total cancer in females was predominantly driven by early-onset breast cancer.

<sup>b</sup> Met the guidelines of 150 minutes of moderate activity per week or 75 minutes of vigorous activity (or an equivalent combination).



**eTable 5. Characteristics of female participants (N=34383) at baseline according to breast cancer PRS**

| Characteristics <sup>a,b</sup>                | Breast Cancer PRS |                           |                   |
|-----------------------------------------------|-------------------|---------------------------|-------------------|
|                                               | Low<br>(N=11428)  | Intermediate<br>(N=11481) | High<br>(N=11474) |
| <b>Age, mean (SD)</b>                         | 45.0 (2.72)       | 45.0 (2.73)               | 45.0 (2.72)       |
| <b>Female-specific HLS, n (%)</b>             |                   |                           |                   |
| Healthy                                       | 2557 (22.4%)      | 2504 (21.8%)              | 2527 (22.0%)      |
| Intermediate                                  | 8468 (74.1%)      | 8524 (74.2%)              | 8474 (73.9%)      |
| Unhealthy                                     | 403 (3.5%)        | 453 (3.9%)                | 473 (4.1%)        |
| <b>Smoking, n (%)</b>                         |                   |                           |                   |
| Current smoker                                | 1201 (10.5%)      | 1214 (10.6%)              | 1230 (10.7%)      |
| Others                                        | 10227 (89.5%)     | 10267 (89.4%)             | 10244 (89.3%)     |
| <b>BMI, n (%)</b>                             |                   |                           |                   |
| 18.5≤ to <25 kg/m <sup>2</sup>                | 5424 (47.5%)      | 5503 (47.9%)              | 5535 (48.2%)      |
| Others                                        | 6004 (52.5%)      | 5978 (52.1%)              | 5939 (51.8%)      |
| <b>Physical activity, n (%)</b>               |                   |                           |                   |
| Met the guidelines <sup>c</sup>               | 5875 (51.4%)      | 5930 (51.7%)              | 5811 (50.6%)      |
| Didn't meet the guidelines                    | 5553 (48.6%)      | 5551 (48.3%)              | 5663 (49.4%)      |
| <b>Alcohol intake, n (%)</b>                  |                   |                           |                   |
| Never                                         | 633 (5.5%)        | 591 (5.1%)                | 555 (4.8%)        |
| Special occasions only                        | 1253 (11.0%)      | 1322 (11.5%)              | 1232 (10.7%)      |
| One to three times a month                    | 1725 (15.1%)      | 1687 (14.7%)              | 1769 (15.4%)      |
| Once or twice a week                          | 3418 (29.9%)      | 3431 (29.9%)              | 3519 (30.7%)      |
| Three or four times a week                    | 2831 (24.8%)      | 2793 (24.3%)              | 2749 (24.0%)      |
| Daily or almost daily                         | 1568 (13.7%)      | 1657 (14.4%)              | 1650 (14.4%)      |
| <b>Fruit and vegetable intake, n (%)</b>      |                   |                           |                   |
| <3 servings/day                               | 3933 (34.4%)      | 4157 (36.2%)              | 3987 (34.7%)      |
| ≥3 to <5 servings/day                         | 4959 (43.4%)      | 4892 (42.6%)              | 5046 (44.0%)      |
| ≥5 servings/day                               | 2536 (22.2%)      | 2432 (21.2%)              | 2441 (21.3%)      |
| <b>Whole grain intake, n (%)</b>              |                   |                           |                   |
| <2 servings/day                               | 7273 (63.6%)      | 7343 (64.0%)              | 7277 (63.4%)      |
| ≥2 to <5.5 servings/day                       | 4114 (36.0%)      | 4099 (35.7%)              | 4156 (36.2%)      |
| ≥5.5 servings/day                             | 41 (0.4%)         | 39 (0.3%)                 | 41 (0.4%)         |
| <b>Red and processed meat intake, n (%)</b>   |                   |                           |                   |
| <2 times/week                                 | 2344 (20.5%)      | 2310 (20.1%)              | 2312 (20.2%)      |
| ≥2 to <4 times/week                           | 5463 (47.8%)      | 5437 (47.4%)              | 5394 (47.0%)      |
| ≥4 times/week                                 | 3621 (31.7%)      | 3734 (32.5%)              | 3768 (32.8%)      |
| <b>Average total household income, n (%)</b>  |                   |                           |                   |
| Less than 18,000                              | 1177 (10.3%)      | 1172 (10.2%)              | 1239 (10.8%)      |
| 18,000 to 30,999                              | 1888 (16.5%)      | 1922 (16.7%)              | 1923 (16.8%)      |
| 31,000 to 51,999                              | 3361 (29.4%)      | 3303 (28.8%)              | 3339 (29.1%)      |
| 52,000 to 100,000                             | 3311 (29.0%)      | 3361 (29.3%)              | 3284 (28.6%)      |
| Greater than 100,000                          | 926 (8.1%)        | 923 (8.0%)                | 900 (7.8%)        |
| Prefer not to answer or do not know           | 765 (6.7%)        | 800 (7.0%)                | 789 (6.9%)        |
| <b>Family history of breast cancer, n (%)</b> |                   |                           |                   |
| No                                            | 10583 (92.6%)     | 10315 (89.8%)             | 10092 (88.0%)     |
| Yes                                           | 845 (7.4%)        | 1166 (10.2%)              | 1382 (12.0%)      |
| <b>Education, n (%)</b>                       |                   |                           |                   |
| College or University degree                  | 4649 (40.7%)      | 4702 (41.0%)              | 4660 (40.6%)      |

|                                                                     |               |               |               |
|---------------------------------------------------------------------|---------------|---------------|---------------|
| Some professional qualifications                                    | 293 (2.6%)    | 305 (2.7%)    | 309 (2.7%)    |
| Secondary education                                                 | 6124 (53.6%)  | 6148 (53.5%)  | 6193 (54.0%)  |
| Others                                                              | 336 (2.9%)    | 302 (2.6%)    | 283 (2.5%)    |
| Prefer not to answer                                                | 26 (0.2%)     | 24 (0.2%)     | 29 (0.3%)     |
| <b>Age at menarche, n (%)</b>                                       |               |               |               |
| <12 years of age                                                    | 1937 (16.9%)  | 1983 (17.3%)  | 1986 (17.3%)  |
| 12 to 13 years of age                                               | 5050 (44.2%)  | 5060 (44.1%)  | 5047 (44.0%)  |
| ≥14 years of age                                                    | 4180 (36.6%)  | 4172 (36.3%)  | 4167 (36.3%)  |
| Prefer not to answer or do not know                                 | 261 (2.3%)    | 266 (2.3%)    | 274 (2.4%)    |
| <b>Parity, n (%)</b>                                                |               |               |               |
| Nulliparous                                                         | 3059 (26.8%)  | 3026 (26.4%)  | 3111 (27.1%)  |
| Parous                                                              | 8366 (73.2%)  | 8453 (73.6%)  | 8359 (72.9%)  |
| Prefer not to answer or do not know                                 | 3 (0.0%)      | 2 (0.0%)      | 4 (0.0%)      |
| <b>Age at first live birth, n (%)</b>                               |               |               |               |
| <25 years of age                                                    | 2004 (17.5%)  | 2027 (17.7%)  | 1959 (17.1%)  |
| 25 to 29 years of age                                               | 2508 (21.9%)  | 2564 (22.3%)  | 2526 (22.0%)  |
| ≥30 years of age                                                    | 2048 (17.9%)  | 2068 (18.0%)  | 2104 (18.3%)  |
| Prefer not to answer or do not know                                 | 4868 (42.6%)  | 4822 (42.0%)  | 4885 (42.6%)  |
| <b>Oral contraceptive use, n (%)</b>                                |               |               |               |
| Yes                                                                 | 10473 (91.6%) | 10595 (92.3%) | 10569 (92.1%) |
| No                                                                  | 939 (8.2%)    | 878 (7.6%)    | 897 (7.8%)    |
| Prefer not to answer or do not know                                 | 16 (0.1%)     | 8 (0.1%)      | 8 (0.1%)      |
| <b>Menopausal status and hormone replacement therapy use, n (%)</b> |               |               |               |
| Postmenopausal (with hormone replacement therapy)                   | 266 (2.3%)    | 264 (2.3%)    | 254 (2.2%)    |
| Postmenopausal (without hormone replacement therapy)                | 504 (4.4%)    | 512 (4.5%)    | 482 (4.2%)    |
| Premenopausal                                                       | 10641 (93.1%) | 10687 (93.1%) | 10723 (93.5%) |
| Prefer not to answer or do not know                                 | 17 (0.1%)     | 18 (0.2%)     | 15 (0.1%)     |
| <b>History of mammograms, n (%)</b>                                 |               |               |               |
| Yes                                                                 | 2799 (24.5%)  | 2954 (25.7%)  | 3132 (27.3%)  |
| No                                                                  | 8592 (75.2%)  | 8490 (73.9%)  | 8303 (72.4%)  |
| Prefer not to answer or do not know                                 | 37 (0.3%)     | 37 (0.3%)     | 39 (0.3%)     |

Abbreviations: PRS, polygenic risk score; HLS, health-associated lifestyle score; SD, standard deviation.

<sup>a</sup> Characteristics of eligible female participants.

<sup>b</sup> Mean (SD) for continuous variables and n (%) for categorical variables.

<sup>c</sup> Met the guidelines of 150 minutes of moderate activity per week or 75 minutes of vigorous activity (or an equivalent combination).

**eTable 6. Characteristics of female participants (N=34383) at baseline according to female-specific HLS**

| Characteristics <sup>a,b</sup>                 | Female-specific HLS |                           |                       |
|------------------------------------------------|---------------------|---------------------------|-----------------------|
|                                                | Healthy<br>(N=7588) | Intermediate<br>(N=25466) | Unhealthy<br>(N=1329) |
| <b>Age, mean (SD)</b>                          | 45.0 (2.72)         | 45.0 (2.72)               | 45.0 (2.70)           |
| <b>Female-specific Total Cancer PRS, n (%)</b> |                     |                           |                       |
| Low                                            | 2566 (33.8%)        | 8462 (33.2%)              | 416 (31.3%)           |
| Intermediate                                   | 2515 (33.1%)        | 8527 (33.5%)              | 434 (32.7%)           |
| High                                           | 2507 (33.0%)        | 8477 (33.3%)              | 479 (36.0%)           |
| <b>Smoking, n (%)</b>                          |                     |                           |                       |
| Current smoker                                 | 36 (0.5%)           | 2280 (9.0%)               | 1329 (100%)           |
| Others                                         | 7552 (99.5%)        | 23186 (91.0%)             | 0 (0%)                |
| <b>BMI, n (%)</b>                              |                     |                           |                       |
| 18.5≤ to <25 kg/m <sup>2</sup>                 | 4204 (55.4%)        | 11712 (46.0%)             | 546 (41.1%)           |
| Others                                         | 3384 (44.6%)        | 13754 (54.0%)             | 783 (58.9%)           |
| <b>Physical activity, n (%)</b>                |                     |                           |                       |
| Met the guidelines <sup>c</sup>                | 7279 (95.9%)        | 10337 (40.6%)             | 0 (0%)                |
| Didn't meet the guidelines                     | 309 (4.1%)          | 15129 (59.4%)             | 1329 (100%)           |
| <b>Alcohol intake, n (%)</b>                   |                     |                           |                       |
| Never                                          | 1132 (14.9%)        | 647 (2.5%)                | 0 (0%)                |
| Special occasions only                         | 701 (9.2%)          | 2906 (11.4%)              | 200 (15.0%)           |
| One to three times a month                     | 1008 (13.3%)        | 3974 (15.6%)              | 199 (15.0%)           |
| Once or twice a week                           | 2211 (29.1%)        | 7822 (30.7%)              | 335 (25.2%)           |
| Three or four times a week                     | 1772 (23.4%)        | 6307 (24.8%)              | 294 (22.1%)           |
| Daily or almost daily                          | 764 (10.1%)         | 3810 (15.0%)              | 301 (22.6%)           |
| <b>Fruit and vegetable intake, n (%)</b>       |                     |                           |                       |
| <3 servings/day                                | 510 (6.7%)          | 10689 (42.0%)             | 878 (66.1%)           |
| ≥3 to <5 servings/day                          | 3252 (42.9%)        | 11240 (44.1%)             | 405 (30.5%)           |
| ≥5 servings/day                                | 3826 (50.4%)        | 3537 (13.9%)              | 46 (3.5%)             |
| <b>Whole grain intake, n (%)</b>               |                     |                           |                       |
| <2 servings/day                                | 3413 (45.0%)        | 17364 (68.2%)             | 1116 (84.0%)          |
| ≥2 to <5.5 servings/day                        | 4114 (54.2%)        | 8042 (31.6%)              | 213 (16.0%)           |
| ≥5.5 servings/day                              | 61 (0.8%)           | 60 (0.2%)                 | 0 (0%)                |
| <b>Red and processed meat intake, n (%)</b>    |                     |                           |                       |
| <2 times/week                                  | 3294 (43.4%)        | 3572 (14.0%)              | 100 (7.5%)            |
| ≥2 to <4 times/week                            | 3723 (49.1%)        | 11961 (47.0%)             | 610 (45.9%)           |
| ≥4 times/week                                  | 571 (7.5%)          | 9933 (39.0%)              | 619 (46.6%)           |
| <b>Average total household income, n (%)</b>   |                     |                           |                       |
| Less than 18,000                               | 771 (10.2%)         | 2576 (10.1%)              | 241 (18.1%)           |
| 18,000 to 30,999                               | 1183 (15.6%)        | 4274 (16.8%)              | 276 (20.8%)           |
| 31,000 to 51,999                               | 2131 (28.1%)        | 7489 (29.4%)              | 383 (28.8%)           |
| 52,000 to 100,000                              | 2317 (30.5%)        | 7362 (28.9%)              | 277 (20.8%)           |
| Greater than 100,000                           | 625 (8.2%)          | 2072 (8.1%)               | 52 (3.9%)             |
| Prefer not to answer or do not know            | 561 (7.4%)          | 1693 (6.6%)               | 100 (7.5%)            |
| <b>Family history of cancer, n (%)</b>         |                     |                           |                       |
| No                                             | 5536 (73.0%)        | 18226 (71.6%)             | 915 (68.8%)           |
| Yes                                            | 2052 (27.0%)        | 7240 (28.4%)              | 414 (31.2%)           |
| <b>Education, n (%)</b>                        |                     |                           |                       |
| College or University degree                   | 3496 (46.1%)        | 10129 (39.8%)             | 386 (29.0%)           |

|                                                                     |              |               |              |
|---------------------------------------------------------------------|--------------|---------------|--------------|
| Some professional qualifications                                    | 208 (2.7%)   | 647 (2.5%)    | 52 (3.9%)    |
| Secondary education                                                 | 3674 (48.4%) | 13993 (54.9%) | 798 (60.0%)  |
| Others                                                              | 186 (2.5%)   | 645 (2.5%)    | 90 (6.8%)    |
| Prefer not to answer                                                | 24 (0.3%)    | 52 (0.2%)     | 3 (0.2%)     |
| <b>Age at menarche, n (%)</b>                                       |              |               |              |
| <12 years of age                                                    | 1313 (17.3%) | 4352 (17.1%)  | 241 (18.1%)  |
| 12 to 13 years of age                                               | 3376 (44.5%) | 11233 (44.1%) | 548 (41.2%)  |
| ≥14 years of age                                                    | 2741 (36.1%) | 9261 (36.4%)  | 517 (38.9%)  |
| Prefer not to answer or do not know                                 | 158 (2.1%)   | 620 (2.4%)    | 23 (1.7%)    |
| <b>Parity, n (%)</b>                                                |              |               |              |
| Nulliparous                                                         | 2267 (29.9%) | 6531 (25.6%)  | 398 (29.9%)  |
| Parous                                                              | 5317 (70.1%) | 18933 (74.3%) | 928 (69.8%)  |
| Prefer not to answer or do not know                                 | 4 (0.1%)     | 2 (0.0%)      | 3 (0.2%)     |
| <b>Age at first live birth, n (%)</b>                               |              |               |              |
| <25 years of age                                                    | 1202 (15.8%) | 4450 (17.5%)  | 338 (25.4%)  |
| 25 to 29 years of age                                               | 1656 (21.8%) | 5731 (22.5%)  | 211 (15.9%)  |
| ≥30 years of age                                                    | 1340 (17.7%) | 4756 (18.7%)  | 124 (9.3%)   |
| Prefer not to answer or do not know                                 | 3390 (44.7%) | 10529 (41.3%) | 656 (49.4%)  |
| <b>Oral contraceptive use, n (%)</b>                                |              |               |              |
| Yes                                                                 | 6877 (90.6%) | 23510 (92.3%) | 1250 (94.1%) |
| No                                                                  | 702 (9.3%)   | 1933 (7.6%)   | 79 (5.9%)    |
| Prefer not to answer or do not know                                 | 9 (0.1%)     | 23 (0.1%)     | 0 (0%)       |
| <b>Menopausal status and hormone replacement therapy use, n (%)</b> |              |               |              |
| Postmenopausal (with hormone replacement therapy)                   | 168 (2.2%)   | 565 (2.2%)    | 51 (3.8%)    |
| Postmenopausal (without hormone replacement therapy)                | 339 (4.5%)   | 1069 (4.2%)   | 90 (6.8%)    |
| Premenopausal                                                       | 7070 (93.2%) | 23796 (93.4%) | 1185 (89.2%) |
| Prefer not to answer or do not know                                 | 11 (0.1%)    | 36 (0.1%)     | 3 (0.2%)     |
| <b>History of mammograms, n (%)</b>                                 |              |               |              |
| Yes                                                                 | 1982 (26.1%) | 6562 (25.8%)  | 341 (25.7%)  |
| No                                                                  | 5580 (73.5%) | 18821 (73.9%) | 984 (74.0%)  |
| Prefer not to answer or do not know                                 | 26 (0.3%)    | 83 (0.3%)     | 4 (0.3%)     |

Abbreviations: PRS, polygenic risk score; HLS, health-associated lifestyle score; SD, standard deviation.

<sup>a</sup> Characteristics of eligible female participants.

<sup>b</sup> Mean (SD) for continuous variables and n (%) for categorical variables.

<sup>c</sup> Met the guidelines of 150 minutes of moderate activity per week or 75 minutes of vigorous activity (or an equivalent combination).

**eTable 7. Characteristics of male participants (N=31925) at baseline according to male-specific HLS**

| Characteristics <sup>a,b</sup>               | Male-specific HLS   |                           |                       |
|----------------------------------------------|---------------------|---------------------------|-----------------------|
|                                              | Healthy<br>(N=2277) | Intermediate<br>(N=19821) | Unhealthy<br>(N=9827) |
| <b>Age, mean (SD)</b>                        | 44.9 (2.76)         | 44.9 (2.74)               | 45.0 (2.74)           |
| <b>Male-specific Total Cancer PRS, n (%)</b> |                     |                           |                       |
| Low                                          | 792 (34.8%)         | 6625 (33.4%)              | 3184 (32.4%)          |
| Intermediate                                 | 740 (32.5%)         | 6560 (33.1%)              | 3307 (33.7%)          |
| High                                         | 745 (32.7%)         | 6636 (33.5%)              | 3336 (33.9%)          |
| <b>Smoking, n (%)</b>                        |                     |                           |                       |
| Current smoker                               | 13 (0.6%)           | 1356 (6.8%)               | 3297 (33.6%)          |
| Others                                       | 2264 (99.4%)        | 18465 (93.2%)             | 6530 (66.4%)          |
| <b>BMI, n (%)</b>                            |                     |                           |                       |
| 18.5≤ to <25 kg/m <sup>2</sup>               | 2116 (92.9%)        | 6246 (31.5%)              | 428 (4.4%)            |
| Others                                       | 161 (7.1%)          | 13575 (68.5%)             | 9399 (95.6%)          |
| <b>Physical activity, n (%)</b>              |                     |                           |                       |
| Met the guidelines <sup>c</sup>              | 2235 (98.2%)        | 14948 (75.4%)             | 1351 (13.7%)          |
| Didn't meet the guidelines                   | 42 (1.8%)           | 4873 (24.6%)              | 8476 (86.3%)          |
| <b>Alcohol intake, n (%)</b>                 |                     |                           |                       |
| Never                                        | 407 (17.9%)         | 791 (4.0%)                | 44 (0.4%)             |
| Special occasions only                       | 101 (4.4%)          | 1118 (5.6%)               | 631 (6.4%)            |
| One to three times a month                   | 223 (9.8%)          | 2258 (11.4%)              | 1146 (11.7%)          |
| Once or twice a week                         | 680 (29.9%)         | 6249 (31.5%)              | 2911 (29.6%)          |
| Three or four times a week                   | 587 (25.8%)         | 5747 (29.0%)              | 2715 (27.6%)          |
| Daily or almost daily                        | 279 (12.3%)         | 3658 (18.5%)              | 2380 (24.2%)          |
| <b>Fruit and vegetable intake, n (%)</b>     |                     |                           |                       |
| <3 servings/day                              | 184 (8.1%)          | 7968 (40.2%)              | 6330 (64.4%)          |
| ≥3 to <5 servings/day                        | 959 (42.1%)         | 7676 (38.7%)              | 2967 (30.2%)          |
| ≥5 servings/day                              | 1134 (49.8%)        | 4177 (21.1%)              | 530 (5.4%)            |
| <b>Whole grain intake, n (%)</b>             |                     |                           |                       |
| <2 servings/day                              | 479 (21.0%)         | 10211 (51.5%)             | 6809 (69.3%)          |
| ≥2 to <5.5 servings/day                      | 1530 (67.2%)        | 9050 (45.7%)              | 2941 (29.9%)          |
| ≥5.5 servings/day                            | 268 (11.8%)         | 560 (2.8%)                | 77 (0.8%)             |
| <b>Red and processed meat intake, n (%)</b>  |                     |                           |                       |
| <2 times/week                                | 738 (32.4%)         | 1993 (10.1%)              | 254 (2.6%)            |
| ≥2 to <4 times/week                          | 1150 (50.5%)        | 7426 (37.5%)              | 2926 (29.8%)          |
| ≥4 times/week                                | 389 (17.1%)         | 10402 (52.5%)             | 6647 (67.6%)          |
| <b>Average total household income, n (%)</b> |                     |                           |                       |
| Less than 18,000                             | 182 (8.0%)          | 1378 (7.0%)               | 881 (9.0%)            |
| 18,000 to 30,999                             | 344 (15.1%)         | 2949 (14.9%)              | 1365 (13.9%)          |
| 31,000 to 51,999                             | 658 (28.9%)         | 6140 (31.0%)              | 2936 (29.9%)          |
| 52,000 to 100,000                            | 720 (31.6%)         | 6408 (32.3%)              | 3255 (33.1%)          |
| Greater than 100,000                         | 248 (10.9%)         | 1840 (9.3%)               | 875 (8.9%)            |
| Prefer not to answer or do not know          | 125 (5.5%)          | 1106 (5.6%)               | 515 (5.2%)            |
| <b>Family history of cancer, n (%)</b>       |                     |                           |                       |
| No                                           | 1659 (72.9%)        | 14243 (71.9%)             | 6995 (71.2%)          |
| Yes                                          | 618 (27.1%)         | 5578 (28.1%)              | 2832 (28.8%)          |
| <b>Education, n (%)</b>                      |                     |                           |                       |
| College or University degree                 | 1216 (53.4%)        | 7960 (40.2%)              | 3445 (35.1%)          |

|                                  |             |               |              |
|----------------------------------|-------------|---------------|--------------|
| Some professional qualifications | 28 (1.2%)   | 332 (1.7%)    | 184 (1.9%)   |
| Secondary education              | 970 (42.6%) | 10666 (53.8%) | 5656 (57.6%) |
| Others                           | 58 (2.5%)   | 779 (3.9%)    | 523 (5.3%)   |
| Prefer not to answer             | 5 (0.2%)    | 84 (0.4%)     | 19 (0.2%)    |

Abbreviations: PRS, polygenic risk score; HLS, health-associated lifestyle score; SD, standard deviation.

<sup>a</sup> Characteristics of eligible male participants.

<sup>b</sup> Mean (SD) for continuous variables and n (%) for categorical variables.

<sup>c</sup> Met the guidelines of 150 minutes of moderate activity per week or 75 minutes of vigorous activity (or an equivalent combination).
